# Supplementary material for: Identification and validation of the biomarkers related to ferroptosis in calcium oxalate nephrolithiasis
Source: publisher site journal article supplement (doi:10.18632/aging.205684), 2024-03-25
Supplement: Supplementary file [file aging-v16i7-205684-supplementary-material-SD3.pdf]

## SUPPLEMENTARY TABLES

**Supplementary Table 3. The antibodies and primers used in this article.**

| Reagents       | Vendor                | Catalogue number | Information                                                                     |
|----------------|-----------------------|------------------|---------------------------------------------------------------------------------|
| Antibody-GPX4  | ProteinTech           | 67763-1-Ig       | IHC: 1:2000                                                                     |
| Antibody-LAMP2 | ProteinTech           | 66301-1-Ig       | IHC: 1:1000, IF: 1:250                                                          |
| Antibody-MDM4  | ProteinTech           | 17914-1-AP       | IHC: 1:500, IF: 1:150                                                           |
| Primer-GPX4    | Tsingke Biotechnology | /                | Forward: 5'-GAGGCAAGACCGAAGTAAACTAC-3'<br>Reverse: 5'-CCGAACTGGTTACACGGGAA-3    |
| Primer-LAMP2   | Tsingke Biotechnology | /                | Forward: 5'-GCACAGTGAGCACAAATGAGT -3'<br>Reverse: 5'-CAGTGGTGTGTATGGTGGGT -3    |
| Primer-MDM4    | Tsingke Biotechnology | /                | Forward: 5'-TGATTGTCGAAGAACCATTTCGG-3'<br>Reverse: 5'-TGCAGGGATCAAAAAGTTTGGAG-3 |

**Supplementary Table 4. The adjacent nodes of DEFERGs.**

| #node     | Identifier           | Node_degree |
|-----------|----------------------|-------------|
| PTEN      | 9606.ENSP00000361021 | 17          |
| IFNG      | 9606.ENSP00000229135 | 10          |
| SQSTM1    | 9606.ENSP00000374455 | 9           |
| CAV1      | 9606.ENSP00000339191 | 8           |
| MAPK1     | 9606.ENSP00000215832 | 8           |
| PIK3CA    | 9606.ENSP00000263967 | 8           |
| ADIPOQ    | 9606.ENSP00000389814 | 6           |
| MDM4      | 9606.ENSP00000356150 | 6           |
| NOX4      | 9606.ENSP00000263317 | 6           |
| PRKAA1    | 9606.ENSP00000346148 | 6           |
| ULK1      | 9606.ENSP00000324560 | 6           |
| IDO1      | 9606.ENSP00000430950 | 5           |
| TSC1      | 9606.ENSP00000298552 | 5           |
| USP7      | 9606.ENSP00000343535 | 5           |
| DLD       | 9606.ENSP00000205402 | 4           |
| GABARAPL1 | 9606.ENSP00000411256 | 4           |
| IFNA2     | 9606.ENSP00000369554 | 4           |
| LAMP2     | 9606.ENSP00000408411 | 4           |
| NOS2      | 9606.ENSP00000327251 | 4           |
| NOX1      | 9606.ENSP00000362057 | 4           |
| HMGB1     | 9606.ENSP00000345347 | 3           |
| PLIN2     | 9606.ENSP00000276914 | 3           |
| TERT      | 9606.ENSP00000309572 | 3           |
| ZEB1      | 9606.ENSP00000354487 | 3           |
| CA9       | 9606.ENSP00000367608 | 2           |
| CDC25A    | 9606.ENSP00000303706 | 2           |
| CS        | 9606.ENSP00000342056 | 2           |
| FGF21     | 9606.ENSP00000471477 | 2           |
| IFNA21    | 9606.ENSP00000369574 | 2           |
| NOX5      | 9606.ENSP00000373518 | 2           |
| ALOX12    | 9606.ENSP00000251535 | 1           |
| ALOX15B   | 9606.ENSP00000369530 | 1           |
| AQP5      | 9606.ENSP00000293599 | 1           |
| AQP8      | 9606.ENSP00000219660 | 1           |
| ASAH2     | 9606.ENSP00000378897 | 1           |

|           |                      |   |
|-----------|----------------------|---|
| BRD2      | 9606.ENSP00000378702 | 1 |
| BRPF1     | 9606.ENSP00000373340 | 1 |
| DPEP1     | 9606.ENSP00000376807 | 1 |
| FZD7      | 9606.ENSP00000286201 | 1 |
| GLS2      | 9606.ENSP00000310447 | 1 |
| MIB2      | 9606.ENSP00000426103 | 1 |
| MTDH      | 9606.ENSP00000338235 | 1 |
| RBMS1     | 9606.ENSP00000294904 | 1 |
| SIAH2     | 9606.ENSP00000322457 | 1 |
| SMPD1     | 9606.ENSP00000340409 | 1 |
| SUV39H1   | 9606.ENSP00000337976 | 1 |
| TIMM9     | 9606.ENSP00000378588 | 1 |
| ALOXE3    | 9606.ENSP00000314879 | 0 |
| AMN       | 9606.ENSP00000299155 | 0 |
| CHAC1     | 9606.ENSP00000484644 | 0 |
| ETV4      | 9606.ENSP00000321835 | 0 |
| HCAR1     | 9606.ENSP00000389255 | 0 |
| MIOX      | 9606.ENSP00000216075 | 0 |
| MS4A15    | 9606.ENSP00000386022 | 0 |
| OSBPL9    | 9606.ENSP00000412733 | 0 |
| PANX2     | 9606.ENSP00000379183 | 0 |
| POM121L12 | 9606.ENSP00000386133 | 0 |
| TFR2      | 9606.ENSP00000420525 | 0 |
| YTHDC2    | 9606.ENSP00000161863 | 0 |
| YY1AP1    | 9606.ENSP00000357323 | 0 |

---
