# Supplementary material for: Identification and validation of the biomarkers related to ferroptosis in calcium oxalate nephrolithiasis
Source: publisher site journal article supplement (doi:10.18632/aging.205684), 2024-03-25
Supplement: Supplementary file [file aging-v16i7-205684-supplementary-material-SD5.pdf]

**Supplementary Table 6. Two clusters in Plaque group based on the hub DEFERGs.**

| <b>ID</b>         | <b>Cluster</b> |
|-------------------|----------------|
| GSM1900676_Plaque | C1             |
| GSM1900678_Plaque | C1             |
| GSM1900680_Plaque | C1             |
| GSM1900681_Plaque | C1             |
| GSM1900683_Plaque | C2             |
| GSM1900687_Plaque | C1             |
| GSM1900689_Plaque | C2             |
| GSM1900691_Plaque | C2             |
| GSM1900693_Plaque | C2             |
| GSM1900695_Plaque | C2             |
| GSM1900697_Plaque | C2             |
| GSM1900699_Plaque | C2             |
| GSM1900701_Plaque | C2             |
| GSM1900704_Plaque | C2             |
| GSM1900706_Plaque | C1             |
| GSM1900708_Plaque | C1             |
| GSM1900709_Plaque | C2             |
| GSM1900711_Plaque | C2             |
| GSM1900712_Plaque | C2             |
| GSM1900715_Plaque | C2             |
| GSM1900717_Plaque | C2             |
| GSM1900719_Plaque | C1             |
| GSM1900721_Plaque | C1             |
| GSM1900723_Plaque | C2             |
| GSM1900725_Plaque | C2             |
| GSM1900727_Plaque | C1             |
| GSM1900729_Plaque | C2             |
| GSM1900731_Plaque | C2             |
| GSM1900734_Plaque | C2             |
