# Supplementary material for: Identification and validation of the biomarkers related to ferroptosis in calcium oxalate nephrolithiasis
Source: Aging (Albany NY). 2024 Mar 25;16(7):5987–6007. doi: 10.18632/aging.205684 (PMC11042938; doi:10.18632/aging.205684)
Supplement: Supplementary Table 1 [file aging-16-205684-s001.xls]

## Sheet: Supplementary Table 1
Supplementary Table 1. Ferroptosis-related genes in FerrDb database.
ID	Type
RPL8	Driver
IREB2	Driver
ATP5MC3	Driver
CS	Driver
EMC2	Driver
ACSF2	Driver
NOX1	Driver
CYBB	Driver
NOX3	Driver
NOX4	Driver
NOX5	Driver
DUOX1	Driver
DUOX2	Driver
G6PD	Driver
PGD	Driver
VDAC2	Driver
PIK3CA	Driver
FLT3	Driver
SCP2	Driver
TP53	Driver
ACSL4	Driver
LPCAT3	Driver
NRAS	Driver
KRAS	Driver
HRAS	Driver
TF	Driver
TFRC	Driver
TFR2	Driver
SLC38A1	Driver
SLC1A5	Driver
GLS2	Driver
GOT1	Driver
CARS1	Driver
ALOX5	Driver
KEAP1	Driver
HMOX1	Driver
ATG5	Driver
ATG7	Driver
NCOA4	Driver
ALOX12	Driver
ALOX12B	Driver
ALOX15	Driver
ALOX15B	Driver
ALOXE3	Driver
PHKG2	Driver
ACO1	Driver
G6PDX	Driver
ULK1	Driver
ATG3	Driver
ATG4D	Driver
BECN1	Driver
MAP1LC3A	Driver
GABARAPL2	Driver
GABARAPL1	Driver
ATG16L1	Driver
WIPI1	Driver
WIPI2	Driver
SNX4	Driver
ATG13	Driver
ULK2	Driver
SAT1	Driver
EGFR	Driver
MAPK3	Driver
MAPK1	Driver
BID	Driver
ZEB1	Driver
DPP4	Driver
CDKN2A	Driver
PEBP1	Driver
SOCS1	Driver
CDO1	Driver
MYB	Driver
MAPK8	Driver
MAPK9	Driver
CHAC1	Driver
MAPK14	Driver
LINC00472	Driver
PRKAA2	Driver
PRKAA1	Driver
ELAVL1	Driver
BAP1	Driver
ABCC1	Driver
MIR6852	Driver
ACVR1B	Driver
TGFBR1	Driver
EPAS1	Driver
HILPDA	Driver
HIF1A	Driver
IFNG	Driver
ANO6	Driver
LPIN1	Driver
HMGB1	Driver
TNFAIP3	Driver
TLR4	Driver
ATF3	Driver
ATM	Driver
YY1AP1	Driver
EGLN2	Driver
MIOX	Driver
TAFAZZIN	Driver
MTDH	Driver
IDH1	Driver
SIRT1	Driver
FBXW7	Driver
PANX1	Driver
DNAJB6	Driver
BACH1	Driver
LONP1	Driver
CD82	Driver
IL1B	Driver
CTSB	Driver
POR	Driver
CYB5R1	Driver
ELOVL5	Driver
FADS1	Driver
PTEN	Driver
NR1D1	Driver
NR1D2	Driver
TBK1	Driver
IL6	Driver
USP7	Driver
miR-182-5p	Driver
miR-378a-3p	Driver
ATF4	Driver
AQP3	Driver
AQP5	Driver
AQP8	Driver
LINC00618	Driver
MT1DP	Driver
PEX10	Driver
AGPAT3	Driver
PEX12	Driver
CHP1	Driver
GPAT4	Driver
BRPF1	Driver
OSBPL9	Driver
INTS2	Driver
MMD	Driver
CYP4F8	Driver
MLLT1	Driver
TTPA	Driver
GRIA3	Driver
EPT1	Driver
POM121L12	Driver
LIG3	Driver
AEBP2	Driver
AGPS	Driver
CDCA3	Driver
PEX2	Driver
PEX6	Driver
TIMM9	Driver
DCAF7	Driver
LCE2C	Driver
FAR1	Driver
PHF21A	Driver
SMAD7	Driver
LYRM1	Driver
AMN	Driver
PEX3	Driver
MTCH1	Driver
ACADSB	Driver
PVT1	Driver
hsa_circ_0008367	Driver
SLC39A14	Driver
MAP3K11	Driver
GSK3B	Driver
BRD7	Driver
SLC25A28	Driver
MFN2	Driver
SLC11A2	Driver
ZFAS1	Driver
TSC1	Driver
TGFB1	Driver
SNCA	Driver
SIRT3	Driver
CGAS	Driver
STING1	Driver
HDDC3	Driver
MIR761	Driver
MDM2	Driver
MDM4	Driver
MIR214	Driver
DLD	Driver
WWTR1	Driver
PRKCA	Driver
LGMN	Driver
SMPD1	Driver
MYCN	Driver
IFNA1	Driver
IFNA2	Driver
IFNA4	Driver
IFNA5	Driver
IFNA6	Driver
IFNA7	Driver
IFNA8	Driver
IFNA10	Driver
IFNA13	Driver
IFNA14	Driver
IFNA16	Driver
IFNA17	Driver
IFNA21	Driver
SMG9	Driver
PPARG	Driver
MIR335	Driver
SNX5	Driver
PAQR3	Driver
MICU1	Driver
TOR2A	Driver
MIR375	Driver
MAP3K14	Driver
CircKDM4C	Driver
MIR324	Driver
QSOX1	Driver
MIB2	Driver
CLTRN	Driver
KLF2	Driver
MIR5096	Driver
HOTAIR	Driver
H19	Driver
FOXO4	Driver
YTHDC2	Driver
DDR2	Driver
SLC39A7	Driver
TRIM46	Driver
ACSL1	Driver
KDM5A	Driver
TRIM21	Driver
DPEP1	Driver
CYGB	Driver
IDO1	Driver
GSTZ1	Driver
GJA1	Driver
SLC7A11	Driver
PGRMC1	Driver
CIRBP	Driver
circPSEN1	Driver
USP11	Driver
YAP1	Driver
MIR135B	Driver
TRIM26	Driver
NDRG1	Driver
MIR302A	Driver
ASMTL-AS1	Driver
FADS2	Driver
PIEZO1	Driver
LIFR	Driver
PTPN6	Driver
MIR15A	Driver
EGR1	Driver
ADAM23	Driver
ARHGEF26-AS1	Driver
CPEB1	Driver
COX4I2	Driver
lncRNA AABR07017145.1	Driver
TIMP1	Driver
KDM6B	Driver
METTL14	Driver
MIB1	Driver
KDM5C	Driver
MEG3	Driver
CCDC6	Driver
CFL1	Driver
MIR539	Driver
KMT2D	Driver
PTGS2	Marker
SLC40A1	Marker
FTH1	Marker
GPX4	Marker
HSPB1	Marker
NFE2L2	Marker
AKR1C1	Suppressor
AKR1C2	Suppressor
AKR1C3	Suppressor
RB1	Suppressor
HSF1	Suppressor
GCLC	Suppressor
SQSTM1	Suppressor
NQO1	Suppressor
MUC1	Suppressor
SLC3A2	Suppressor
MT1G	Suppressor
CISD1	Suppressor
FANCD2	Suppressor
FTMT	Suppressor
HSPA5	Suppressor
HELLS	Suppressor
SCD	Suppressor
SRC	Suppressor
STAT3	Suppressor
PML	Suppressor
MTOR	Suppressor
NFS1	Suppressor
TP63	Suppressor
CDKN1A	Suppressor
MIR137	Suppressor
ENPP2	Suppressor
FH	Suppressor
CISD2	Suppressor
MIR9-1	Suppressor
MIR9-2	Suppressor
MIR9-3	Suppressor
CBS	Suppressor
ISCU	Suppressor
ACSL3	Suppressor
OTUB1	Suppressor
CD44	Suppressor
LINC00336	Suppressor
BRD4	Suppressor
PRDX6	Suppressor
MIR17	Suppressor
SESN2	Suppressor
NF2	Suppressor
ARNTL	Suppressor
JUN	Suppressor
CA9	Suppressor
TMBIM4	Suppressor
PLIN2	Suppressor
MIR212	Suppressor
Fer1HCH	Suppressor
AIFM2	Suppressor
LAMP2	Suppressor
ZFP36	Suppressor
PROM2	Suppressor
CHMP5	Suppressor
CHMP6	Suppressor
CAV1	Suppressor
GCH1	Suppressor
DAZAP1	Suppressor
PIR	Suppressor
FTL	Suppressor
HCAR1	Suppressor
SLC16A1	Suppressor
RRM2	Suppressor
NR4A1	Suppressor
RPTOR	Suppressor
SREBF1	Suppressor
SREBF2	Suppressor
FZD7	Suppressor
P4HB	Suppressor
NT5DC2	Suppressor
BCAT2	Suppressor
PLA2G6	Suppressor
MIR424	Suppressor
PARK7	Suppressor
FXN	Suppressor
SUV39H1	Suppressor
ATF2	Suppressor
ACOT1	Suppressor
ALDH3A2	Suppressor
STK11	Suppressor
FNDC5	Suppressor
CircIL4R	Suppressor
CDH1	Suppressor
NEDD4L	Suppressor
BRD2	Suppressor
BRD3	Suppressor
BRDT	Suppressor
DECR1	Suppressor
GLRX5	Suppressor
NCOA3	Suppressor
NR5A2	Suppressor
PANX2	Suppressor
RHEBP1	Suppressor
TFAP2A	Suppressor
CP	Suppressor
ARF6	Suppressor
GDF15	Suppressor
ABHD12	Suppressor
PPP1R13L	Suppressor
TFAM	Suppressor
KDM3B	Suppressor
RNF113A	Suppressor
AHCY	Suppressor
circ-TTBK2	Suppressor
MIR522	Suppressor
IDH2	Suppressor
PPARA	Suppressor
NOS2	Suppressor
SIAH2	Suppressor
RELA	Suppressor
VDR	Suppressor
NEDD4	Suppressor
PRDX1	Suppressor
AR	Suppressor
MTF1	Suppressor
COPZ1	Suppressor
NUPR1	Suppressor
USP35	Suppressor
NEAT1	Suppressor
PARP1	Suppressor
PARP2	Suppressor
PARP3	Suppressor
PARP4	Suppressor
PARP6	Suppressor
PARP8	Suppressor
PARP9	Suppressor
PARP10	Suppressor
PARP11	Suppressor
PARP12	Suppressor
PARP14	Suppressor
PARP15	Suppressor
PARP16	Suppressor
PDSS2	Suppressor
TXN	Suppressor
SENP1	Suppressor
OIP5-AS1	Suppressor
MIR190A	Suppressor
FGF21	Suppressor
CREB1	Suppressor
CREB3	Suppressor
CREB5	Suppressor
MIR130B	Suppressor
BEX1	Suppressor
ASAH2	Suppressor
FABP4	Suppressor
AKT1S1	Suppressor
MLST8	Suppressor
TYRO3	Suppressor
SIRT6	Suppressor
TMSB4X	Suppressor
TMSB4Y	Suppressor
KIF20A	Suppressor
ECH1	Suppressor
circRHOT1	Suppressor
ETV4	Suppressor
MEG8	Suppressor
VCP	Suppressor
circ_0007142	Suppressor
RBMS1	Suppressor
KDM4A	Suppressor
MGST1	Suppressor
circKIF4A	Suppressor
miR-7-5p	Suppressor
circ_0067934	Suppressor
MPC1	Suppressor
CHMP1A	Suppressor
CAMKK2	Suppressor
SOX2	Suppressor
SRSF9	Suppressor
PROK2	Suppressor
MIR4443	Suppressor
SIRT2	Suppressor
circRNA1615	Suppressor
MIR27A	Suppressor
MIR670	Suppressor
MEF2C	Suppressor
EZH2	Suppressor
PEDS1	Suppressor
ADAMTS13	Suppressor
CDC25A	Suppressor
CircFNDC3B	Suppressor
PPARD	Suppressor
ENO3	Suppressor
LCN2	Suppressor
MARCHF5	Suppressor
TRIB2	Suppressor
DHODH	Suppressor
MIR545	Suppressor
PDK4	Suppressor
CircPVT1	Suppressor
MIR9-3HG	Suppressor
ADIPOQ	Suppressor
circDTL	Suppressor
mmu_circRNA_0000309	Suppressor
PTPN18	Suppressor
ABCC5	Suppressor
CISD3	Suppressor
MS4A15	Suppressor
FURIN	Suppressor
circRHBG	Suppressor
GALNT14	Suppressor
KLHDC3	Suppressor
LINC01833	Suppressor
circGFRA1	Suppressor
MAPKAP1	Suppressor
PRR5	Suppressor
RICTOR	Suppressor
GSTM1	Suppressor
TERT	Suppressor
circ0097009	Suppressor
TMEM161B-DT	Suppressor
circEPSTI1	Suppressor
MIR18A	Suppressor
RARRES2	Suppressor
