# Supplementary material for: Identification and validation of the biomarkers related to ferroptosis in calcium oxalate nephrolithiasis
Source: Aging (Albany NY). 2024 Mar 25;16(7):5987–6007. doi: 10.18632/aging.205684 (PMC11042938; doi:10.18632/aging.205684)
Supplement: Supplementary Table 2 [file aging-16-205684-s002.xls]

## Sheet: Supplementary Table 2
Supplementary Table 2. Differentially expressed genes between normal group and plaque group.
gene	Normal-Mean	Plaque-Mean	logFC	pValue	fdr
CS	3.26614	1.60516	-1.02487	0.0311245	0.206044
NOX1	0.500401	1.55366	1.63452	0.0212524	0.190123
NOX4	0.62776	2.76383	2.13838	0.0496612	0.228303
NOX5	0.247079	2.97701	3.59082	0.0212524	0.190123
PIK3CA	3.88762	1.39993	-1.47353	0.0274908	0.206044
TFR2	0.367482	2.26834	2.6259	0.00151679	0.183065
GLS2	0.562896	3.26615	2.53665	0.0496612	0.228303
ALOX12	0.141402	9.90652	6.1305	0.00186426	0.183065
ALOX15B	0.308669	1.99936	2.6954	0.00659578	0.183065
ALOXE3	0.586967	394.015	9.39075	0.00774292	0.183065
ULK1	8.40232	1.73189	-2.27844	0.0242133	0.200365
GABARAPL1	17.4333	4.50486	-1.95229	0.0162177	0.190123
MAPK1	4.03907	1.68417	-1.26199	0.0443665	0.219184
ZEB1	7.99754	2.96572	-1.43117	0.0242133	0.200365
CHAC1	0.382458	3.79845	3.31204	0.00331329	0.183065
PRKAA1	4.795	1.82383	-1.39456	0.0395365	0.219184
IFNG	0.188466	3.15628	4.06585	0.00227211	0.183065
HMGB1	2.84233	1.29594	-1.13307	0.0274908	0.206044
YY1AP1	3.49843	1.49117	-1.23026	0.0185995	0.190123
MIOX	0.547259	2.54429	2.21697	0.0311245	0.206044
MTDH	5.22365	2.46837	-1.0815	0.0395365	0.219184
PTEN	18.5285	2.80849	-2.72188	0.0395365	0.219184
USP7	7.61482	1.94889	-1.96616	0.00472289	0.183065
AQP5	0.696255	11.262	4.0157	0.0122034	0.190123
AQP8	0.677743	2.16009	1.67228	0.0395365	0.219184
BRPF1	0.435539	1.77392	2.02607	0.0185995	0.190123
OSBPL9	4.15824	1.67474	-1.31204	0.0162177	0.190123
POM121L12	0.816257	6.06846	2.89424	0.0274908	0.206044
TIMM9	7.56961	2.17689	-1.79795	0.0443665	0.219184
AMN	0.573056	3.49331	2.60784	0.00904532	0.190123
TSC1	5.19747	1.75956	-1.5626	0.014096	0.190123
MDM4	3.64252	1.14761	-1.6663	0.0185995	0.190123
DLD	5.58905	1.53548	-1.86392	0.0443665	0.219184
SMPD1	5.07339	2.18573	-1.21484	0.0443665	0.219184
IFNA2	0.124032	8.84869	6.15668	0.00559649	0.183065
IFNA21	0.415974	9.60701	4.52952	0.0311245	0.206044
MIB2	0.406371	3.09985	2.93133	0.0162177	0.190123
YTHDC2	3.93681	1.71968	-1.19488	0.0351265	0.219184
DPEP1	0.763384	2.64544	1.79303	0.0185995	0.190123
IDO1	0.662999	270.193	8.67077	0.00659578	0.183065
SQSTM1	39.9726	4.15115	-3.26743	0.0443665	0.219184
CA9	0.365496	3.66788	3.32702	0.0162177	0.190123
PLIN2	11.4399	4.54076	-1.33307	0.0311245	0.206044
LAMP2	3.66751	1.75937	-1.05974	0.0242133	0.200365
CAV1	85.2767	35.3641	-1.26987	0.0122034	0.190123
HCAR1	0.372958	2.10994	2.50011	0.0443665	0.219184
FZD7	80.4058	5.38796	-3.89949	0.0185995	0.190123
SUV39H1	0.601702	2.29471	1.93119	0.0105301	0.190123
BRD2	5.31227	1.52733	-1.79832	0.0311245	0.206044
PANX2	0.446795	3.52809	2.9812	0.0122034	0.190123
NOS2	8.11699	983.578	6.92095	0.0351265	0.219184
SIAH2	9.4049	2.96067	-1.66749	0.00227211	0.183065
NEAT1	9.93972	1.42691	-2.80031	0.0105301	0.190123
FGF21	0.282876	13.3873	5.56455	0.00774292	0.183065
ASAH2	0.564387	1.2292	1.12297	0.0212524	0.190123
ETV4	0.257798	3.07269	3.57519	0.014096	0.190123
RBMS1	4.48248	1.61857	-1.46958	0.0105301	0.190123
CDC25A	0.217053	25.5802	6.88084	0.00472289	0.183065
ADIPOQ	0.433011	1.95987	2.17828	0.00472289	0.183065
MS4A15	0.163485	20.3007	6.95622	0.0212524	0.190123
TERT	0.78524	159.677	7.66781	0.0443665	0.219184
