# Supplementary material for: Identification and validation of the biomarkers related to ferroptosis in calcium oxalate nephrolithiasis
Source: Aging (Albany NY). 2024 Mar 25;16(7):5987–6007. doi: 10.18632/aging.205684 (PMC11042938; doi:10.18632/aging.205684)
Supplement: Supplementary Table 5 [file aging-16-205684-s004.xls]

## Sheet: Supplementary Table 5
Supplementary Table 5. Gene expression matrix of turquoise module in WGCNA analysis.
ID	GSM1900673_Normal	GSM1900674_Normal	GSM1900684_Normal	GSM1900685_Normal	GSM1900702_Normal	GSM1900732_Normal	GSM1900676_CaOx	GSM1900678_CaOx	GSM1900680_CaOx	GSM1900681_CaOx	GSM1900683_CaOx	GSM1900687_CaOx	GSM1900689_CaOx	GSM1900691_CaOx	GSM1900693_CaOx	GSM1900695_CaOx	GSM1900697_CaOx	GSM1900699_CaOx	GSM1900701_CaOx	GSM1900704_CaOx	GSM1900706_CaOx	GSM1900708_CaOx	GSM1900709_CaOx	GSM1900711_CaOx	GSM1900712_CaOx	GSM1900715_CaOx	GSM1900717_CaOx	GSM1900719_CaOx	GSM1900721_CaOx	GSM1900723_CaOx	GSM1900725_CaOx	GSM1900727_CaOx	GSM1900729_CaOx	GSM1900731_CaOx	GSM1900734_CaOx
IREB2	0.736176	2.63873	2.70991	1.67289	7.0978	1.11864	0.399707	3.85191	0.841656	0.258084	0.435726	1.74264	1.5629	0.0765239	3.33551	0.103644	0.226972	0.0405853	0.0305005	1.45521	7.82174	5.99823	0.065541	1.69177	1.45809	2.53548	0.822989	1.8603	0.464205	0.161002	0.246615	0.482725	1.38718	1.0511	3.49387
TFR2	0.234942	0.179616	0.153586	0.086462	0.350147	1.20014	1.68631	0.760609	0.117323	3.57206	1.73942	0.519383	0.402221	8.35854	2.66498	3.62838	1.32347	10.3593	5.68099	0.884914	0.415248	0.487951	3.88296	0.923487	0.96778	0.614009	4.88842	0.428544	1.1429	1.9566	4.36079	0.798687	1.38631	0.885733	0.944667
GOT1	0.452977	0.693148	0.635949	2.70673	0.850942	0.812576	0.445724	0.137835	2.14301	1.30312	0.69012	2.59212	0.71692	2.27114	1.79566	2.06805	1.08322	12.7837	0.816627	4.75337	1.99807	2.04925	0.267329	0.663082	0.729564	3.0623	1.48384	3.35429	2.49914	1.72216	0.546575	1.30973	0.871944	0.384827	0.416219
ATG5	1.00681	2.81873	1.56368	2.37806	5.48916	0.54084	0.913818	1.25213	0.826996	0.493592	0.641668	1.01945	1.51171	0.307812	0.205385	0.273018	0.0690414	0.08391	0.168138	2.8971	2.99297	4.04592	0.655608	2.53271	4.4453	2.41243	0.665785	4.5886	1.30594	0.326252	0.693071	0.531582	0.234287	0.669591	1.21145
ALOX15	0.373258	0.177663	0.535102	0.357565	0.103102	0.871544	0.90149	0.171489	0.193576	0.110875	0.584259	0.347227	0.46903	24.8425	9.91116	23.9053	37.2632	641.097	14.5333	0.170353	0.0357038	0.0233986	6.07808	0.766474	0.682179	0.198536	1.16267	0.120494	0.221974	9.24504	53.4602	0.850501	3.61949	0.578611	0.393041
ALOX15B	0.136823	0.0770306	0.167034	0.0609862	0.0752406	1.3349	0.0983745	0.159173	1.57481	0.36557	0.128382	0.122684	0.270118	3.40498	0.633245	1.1638	1.11274	10.9458	3.36431	2.40832	0.188408	0.0780963	0.731037	0.19204	0.499955	0.341683	9.04744	0.924505	2.12608	8.71114	2.2144	0.760745	2.96627	2.36561	1.08166
ATG3	2.20428	4.69079	6.75183	0.80283	3.01167	0.248594	1.18324	1.0107	1.26158	0.262174	1.46283	3.16039	0.770066	0.0731766	0.0830397	0.233705	0.101766	0.0111004	0.192255	3.72065	3.32234	2.79752	1.96729	11.1157	1.8689	3.98329	0.852214	3.46876	1.02779	0.54254	0.066835	1.54306	0.0840701	0.872842	1.30601
ATG4D	1.12734	0.794269	0.468197	0.52669	0.534148	0.913222	0.588175	0.667092	1.17303	0.98916	2.29672	0.536544	1.37515	2.1662	1.33678	2.5609	2.3409	4.17748	3.25528	0.411031	0.14671	0.281938	1.08057	0.696222	1.37106	0.400706	0.894684	0.507794	0.521756	1.20672	1.41462	1.49516	1.32063	0.335987	0.425524
ATG16L1	0.881291	1.03275	2.28456	0.410756	0.458869	0.476397	0.590426	0.882217	1.35489	0.748985	3.2702	1.62686	1.53378	2.37474	1.39522	1.17094	1.56665	2.35701	1.53236	1.31533	0.974892	0.292581	1.62171	0.212299	0.53149	1.29869	1.65235	0.77649	1.4538	0.942364	1.55436	0.65153	0.598339	1.06276	1.03841
SNX4	3.59015	7.52882	3.32319	2.52846	6.4295	0.617328	0.861729	2.35237	3.95237	3.56818	0.997321	2.32481	4.8329	0.181341	0.326934	0.305922	0.00586231	0.109775	0.0462713	3.37155	11.5493	6.43671	0.135275	1.77361	2.28342	7.83379	0.378939	7.87812	1.98089	0.924795	1.00269	0.410262	0.191752	0.449979	0.972417
ULK2	0.0551653	0.376122	0.172812	2.71709	0.530273	14.9783	0.0665434	1.18615	0.198312	1.24458	0.0843241	1.05275	0.590285	0.226322	6.95215	1.99149	0.935849	14.046	0.622624	0.292005	0.10768	0.252183	0.539217	0.309327	0.65133	0.425913	3.08655	0.323632	1.48223	4.90943	0.0869641	0.723287	20.2938	3.65796	1.73483
CDKN2A	0.110302	0.0489083	1.43859	0.108527	2.95919	1.05717	0.991767	0.85931	0.582523	2.092	0.495512	4.47945	0.728157	8.97768	1.59672	2.69731	4.8227	8.559	1.07252	0.653328	0.411704	0.311051	0.950511	0.104162	0.200302	0.155149	2.24191	0.269917	1.37553	3.68672	1.84982	0.975334	2.21028	0.460428	0.68235
CHAC1	0.0236784	0.0148878	0.0772976	0.0798675	0.0707969	2.02822	0.657905	0.263438	0.698592	0.862737	1.03927	0.265416	0.108806	6.92127	5.58471	8.03572	1.91035	47.9009	7.51207	0.179409	0.0144491	0.254173	3.84565	0.235737	1.72867	4.44149	2.5459	0.314199	0.381549	2.30776	3.02618	1.70422	1.61844	0.824993	4.97107
PRKAA1	1.93606	2.86475	8.82203	4.25716	10.4473	0.442662	1.12234	1.97982	1.03605	0.990799	0.858487	1.88156	3.25618	0.0791394	0.685106	0.136759	0.290382	0.0210375	0.158489	2.02287	11.2815	9.15117	0.560626	2.02341	1.46846	3.1384	0.68716	4.54389	0.915085	0.244053	1.65318	0.220145	0.372078	0.579512	1.53344
MIOX	0.621744	0.114333	0.428822	0.102323	0.0924089	1.92392	1.1017	1.69968	0.137102	0.917505	8.25887	0.407971	0.567911	8.26063	2.25711	2.09821	4.78266	18.668	4.75882	0.29804	0.174287	0.151084	1.6967	0.33281	0.399344	0.188943	2.75181	0.378683	1.28497	1.69344	2.39835	0.628875	5.17283	1.11995	1.19811
AQP5	0.0439892	0.00979684	0.0711793	0.174543	0.140759	3.73726	0.313366	0.0365758	0.319742	0.0622748	0.467967	1.15409	2.18329	47.4724	5.3413	38.5275	43.6025	100.566	32.3146	0.203106	0.280098	0.171648	6.35275	0.82191	0.19109	0.127816	2.78886	0.119707	0.298597	8.7538	14.3872	0.365903	17.183	1.05255	1.1377
AQP8	0.0627554	0.0299845	0.0557389	0.3494	0.314028	3.25455	0.0606796	0.0265667	2.538	0.138049	0.125834	0.393224	1.08133	2.48404	1.68362	7.71449	4.38196	6.88909	2.84891	0.590557	0.501	0.914929	2.85309	1.41379	0.556608	0.728518	1.51223	0.306855	0.531142	6.38202	2.57612	0.286674	9.1811	1.80098	2.1413
AGPAT3	0.2382	2.02914	1.25195	4.61489	3.4399	0.392166	4.23247	0.574661	7.20878	2.59882	0.988366	1.04463	0.217723	0.0325545	0.318151	0.0244284	0.0100493	0.0396391	3.08571	3.13937	5.13983	5.2148	0.2375	3.30933	1.01177	1.20231	2.36994	2.42576	1.06906	0.330864	0.107799	1.87756	0.380673	1.78426	0.418982
POM121L12	0.126716	0.278777	0.158605	0.135806	0.191915	4.00572	0.0452222	0.0380553	4.19689	0.793817	0.115785	0.264181	0.473637	23.9753	3.36681	9.30946	17.7559	52.2516	24.8302	0.665583	0.323986	0.350729	4.48363	0.902909	0.275055	0.260124	0.750298	0.473362	0.663938	4.97172	9.24243	0.4893	9.8831	2.72941	2.10289
AGPS	1.81272	7.98637	6.12717	1.79621	3.75961	0.316628	1.52121	1.87863	1.42471	1.68123	2.29763	4.19882	1.00284	0.411693	0.0889196	0.144829	0.164821	0.0205824	0.0585161	4.0905	3.8722	2.00371	0.699031	3.75716	1.40545	1.55523	0.597053	5.49988	1.00445	0.419268	0.276131	2.78995	0.113989	0.487864	1.29418
CDCA3	0.0926609	3.45359	0.441635	0.00490928	0.0669863	1.75814	3.13634	3.51816	0.115757	8.19495	9.64636	0.0637834	0.891413	1.66083	0.236828	4.80398	1.61946	9.95003	3.63219	2.91341	0.0993907	0.0457433	5.13484	0.530124	0.919426	0.649377	2.3577	0.282425	1.14778	0.610352	1.89367	0.639841	1.05289	0.519493	0.114524
PHF21A	0.117912	0.0520152	0.114982	0.15781	0.204997	16.3649	0.0559307	0.158285	0.133441	0.0986459	0.145479	0.245099	1.27926	0.910602	0.403979	7.33425	9.96866	10.38	1.16653	1.09817	0.567283	0.645185	6.59864	1.27119	0.437332	0.170477	0.722574	0.11474	0.529331	4.92896	2.45434	0.120118	29.0562	2.08976	3.39623
AMN	0.208992	0.0488659	0.0839998	0.123257	0.215458	2.75777	0.0900065	0.0965049	1.84234	0.27847	0.0887487	0.315164	0.942964	10.7659	2.41943	6.00302	10.2301	31.3803	9.37505	0.592378	0.223437	0.424636	3.2526	2.15822	0.44147	0.21613	1.05085	0.228573	0.320327	2.84914	4.10449	0.323449	7.64248	2.15613	1.4936
ACADSB	5.27792	8.94255	0.487392	6.08766	8.14225	0.171229	0.915384	4.47961	1.79528	0.41692	4.24815	0.573972	7.92393	0.00560649	0.221438	0.161656	0.387066	0.152242	0.118544	1.19111	9.36056	2.24177	0.264069	2.71631	3.25879	1.3574	1.05329	1.49692	1.08649	0.136906	0.385582	0.415521	0.311983	2.80759	1.30375
TSC1	5.13115	7.82843	1.94013	1.73884	13.1614	1.38493	0.922977	1.29286	1.9136	5.50199	0.415088	1.46771	0.15591	0.0309537	0.744128	0.452454	0.0286669	0.02557	0.0824571	1.26835	0.990874	6.61756	0.106229	6.82885	4.54759	2.41605	0.300306	7.99687	2.21756	0.498555	0.0502526	0.85383	0.0911819	0.37229	2.83647
MDM4	2.51905	6.72999	1.93549	3.18814	7.2419	0.240541	0.775572	3.64815	1.18513	0.77114	2.59574	2.27415	1.05007	0.0227118	0.122452	0.188394	0.0465972	0.0302243	0.0692637	1.77442	2.61804	2.7824	0.650143	3.62182	1.56491	0.805374	0.524337	1.59355	1.26983	0.0369366	0.246819	1.10808	0.0475766	0.383567	1.47337
IFNA4	0.143734	0.12671	0.358911	0.544223	0.107823	2.34804	0.827146	1.64777	0.19924	0.636766	3.12053	0.628954	2.50343	1.11876	1.65572	3.00183	17.1521	3.34307	0.673861	0.177254	0.0529129	0.0957531	7.26427	0.361569	2.45441	0.107392	1.82955	0.129142	1.00157	8.52273	23.1428	0.0966683	6.41759	0.231947	0.429676
SNX5	1.64714	3.47589	1.05337	2.10039	1.89592	1.48374	0.788903	0.760706	0.876554	1.2681	1.19682	1.24345	0.666759	0.0624318	0.627058	0.101513	0.0445099	0.00210243	0.0965133	2.52105	4.27147	3.03331	0.191157	1.10976	1.34783	6.79233	0.601645	2.57177	1.22476	0.152253	0.813297	1.66126	0.132758	1.83376	1.7086
TOR2A	0.138097	0.114497	0.515479	0.312825	0.354368	2.08891	0.685275	0.307857	0.45806	1.1765	0.497231	0.333581	0.913636	11.8308	3.8037	5.64772	8.5263	24.8012	8.68394	0.44145	0.294473	0.448075	3.26643	1.28552	0.799475	0.280971	1.23463	0.160071	0.379524	2.03364	1.42751	0.297087	4.7866	1.25103	0.9123
MIB2	0.333113	0.102959	0.16847	0.395123	0.173942	1.26462	0.235749	0.145838	3.32971	1.6932	0.142117	0.893476	1.93377	7.64679	3.36888	3.79056	10.2022	21.6789	14.4395	0.388195	0.180901	0.194899	1.48054	0.388181	0.755426	0.425198	2.25414	0.208872	0.788937	3.04223	4.17794	1.12885	3.49456	0.838474	0.647614
HOTAIR	2.9855	6.41027	0.200358	0.135955	0.0373436	1.06312	0.533714	1.28833	0.148609	1.37358	1.83682	0.442711	0.310218	3.8852	0.946841	3.85948	3.49454	3.67932	1.70143	0.575234	0.195208	0.210044	1.81582	0.426665	0.809001	0.682769	0.261983	0.13822	1.26405	1.36678	1.77587	2.51114	2.41438	0.18262	0.761385
TRIM46	1.02801	0.103747	0.267596	1.2233	0.138567	1.59478	1.10939	0.465367	1.10286	1.47611	1.50028	0.418953	1.2048	4.11628	0.89434	0.909569	1.17054	5.08558	4.33133	0.403172	0.475611	0.952718	1.05458	0.3876	0.25394	0.615916	5.63177	0.485306	0.839096	1.6856	2.35382	0.584162	1.32552	1.49773	0.792254
TRIM21	0.383218	0.482969	1.75486	1.23379	0.465647	0.434801	6.35194	0.743352	0.35355	1.07642	0.548238	1.05747	0.49959	2.2779	2.06273	1.80982	2.42031	3.81554	19.2866	0.588181	0.993568	0.974211	0.360281	0.439383	2.13359	0.720344	1.52657	1.91203	5.47476	1.89911	0.665137	0.365811	0.988282	1.41067	0.847928
DPEP1	0.0486778	0.174709	0.0655955	0.0161806	0.0932232	4.18192	1.01459	0.24162	17.23	2.94017	0.368442	0.210936	0.387305	2.60709	0.108306	4.04227	1.34351	9.8565	0.244734	0.0745276	0.0136801	0.0744998	11.0016	0.628535	4.54903	0.680356	3.66879	0.656663	1.38515	1.85535	1.4961	0.690945	6.84738	1.49245	1.00716
GSTZ1	0.359181	0.696038	1.26769	0.489698	1.83751	0.419367	2.76256	0.804317	1.15312	1.14686	1.44557	0.289188	1.1827	1.42553	0.629598	1.25327	1.65233	5.40536	1.70739	1.05001	0.674952	0.609047	0.654036	3.32429	0.62164	1.02272	0.947527	1.11872	0.325767	0.629942	0.972089	0.629826	0.961686	1.85801	0.518116
YAP1	2.80793	4.5682	0.371563	3.55614	3.56684	0.515932	2.17858	0.957436	0.851545	0.721267	3.16237	0.719853	3.72735	0.0471323	0.234983	0.0326209	0.0474711	0.0150053	0.562088	2.33888	3.84241	2.5675	0.0648734	1.53978	3.04125	4.19198	1.1566	3.62703	2.36114	0.11127	1.85347	3.35273	0.216327	0.947426	0.604958
FADS2	0.679015	0.680602	2.34059	0.45506	0.414231	1.38453	3.2446	3.1131	0.307019	0.259633	0.404626	2.51044	0.192058	9.52205	7.43386	2.11006	4.23558	1.39214	3.53147	1.00828	0.503731	1.00477	3.30961	1.64967	2.17587	1.03305	2.02725	0.805001	0.749885	1.00546	1.56713	1.49905	9.10938	1.35053	2.21847
PIEZO1	0.846946	0.878545	1.37372	1.47542	0.582864	0.508197	1.34739	0.847683	1.78809	0.865269	0.778305	0.317514	0.531033	1.39786	0.570474	0.172631	0.278079	0.243411	0.217352	2.11889	1.99418	2.08193	1.03846	1.47294	2.08163	3.20147	3.08407	2.85361	1.50591	0.545069	0.743262	1.26079	1.12622	1.22419	0.810731
ARHGEF26_AS1	0.484419	0.334675	3.95145	0.0126081	0.00286647	1.74531	0.340984	1.17067	0.503502	0.890397	2.16709	0.0244176	0.789541	0.0291088	0.746735	17.448	14.4667	47.3576	0.0910463	0.105172	0.0049179	0.0162851	15.3068	4.11676	14.5521	3.69662	0.407913	0.153593	5.05026	19.6717	0.490842	0.0396639	0.705218	0.0157257	0.132528
GPX4	1.49798	3.18354	3.76059	2.63038	3.50198	0.324119	5.7215	1.71786	1.57705	3.66389	1.01591	2.73421	0.842012	0.57817	0.567208	0.0663818	0.00857414	0.00295283	0.370808	12.2928	6.78776	6.21069	1.08108	1.68993	2.11376	10.7429	3.46198	9.94535	2.76091	0.367124	0.157178	0.984337	0.092255	1.33844	0.769443
RB1	2.03112	1.8557	5.29481	5.09022	4.24103	1.5746	1.89382	1.65197	1.08614	1.76748	0.414784	6.5906	0.648197	0.179177	0.720051	0.0923555	0.0627385	0.00180753	0.210767	7.06321	11.1247	10.1882	0.417409	0.377978	0.427734	0.899343	0.630377	2.96253	0.984772	0.549476	1.07415	3.03613	0.631539	5.42388	4.12275
NFS1	0.554007	2.47712	0.531775	2.1359	4.46699	1.73219	2.56151	1.33781	1.44559	6.17999	1.78411	0.681009	2.50495	0.0433129	1.58133	0.0353593	0.00903647	0.00419059	0.392953	0.867209	4.63653	1.77744	0.299037	4.51289	1.35225	4.64866	1.53382	1.79829	2.29063	0.067817	0.0971018	0.914128	0.149421	1.50889	0.689402
CISD2	0.75718	0.937179	4.25776	5.72215	9.98335	2.22545	2.56218	0.950951	1.63305	2.69672	0.335464	8.23522	1.26122	0.308941	1.11965	0.0603929	0.0432021	0.00416115	0.109574	3.98702	2.78261	6.96823	0.213981	1.27392	1.44937	2.8636	1.05158	13.9083	1.31768	0.535996	0.518607	1.72749	0.258466	1.31966	4.30588
ISCU	1.09916	1.24126	0.511012	2.57926	3.12821	3.03316	1.20319	0.486919	0.554247	2.2853	0.140005	3.78949	1.16288	0.190262	3.19805	0.0692177	0.0228954	0.00332113	0.960506	1.86873	7.95193	6.64562	0.333952	0.366975	0.32693	2.1027	0.274548	1.59075	1.01636	0.162458	0.418189	1.92728	0.276903	3.21257	1.76156
TMBIM4	0.646809	1.47876	3.33653	3.84822	4.4488	1.11768	3.62954	0.828383	1.15621	1.5023	1.30195	2.62833	0.987179	0.494798	0.721305	0.230601	0.0479202	0.0194777	0.772411	2.22934	4.28986	6.36012	0.662698	0.683842	2.28484	0.832663	0.444091	1.70452	0.923767	0.30495	0.179361	0.282667	0.215782	1.63299	1.31523
LAMP2	4.76536	1.80084	5.547	4.8824	3.31692	1.69254	3.53645	2.95209	3.83093	2.93699	0.357588	4.71076	0.362939	0.224325	1.0875	0.114869	0.00600491	0.0532272	0.401933	1.04001	5.68739	5.52593	0.455503	0.39446	0.83634	1.95151	0.957547	3.22428	2.46626	0.331454	0.148507	3.31045	0.199212	2.0209	1.89642
CHMP6	0.38112	0.422799	0.441023	0.126692	0.310063	2.1678	1.15684	1.30915	0.204649	1.69792	1.4226	0.205304	0.234287	2.25517	0.502702	2.6934	2.58956	7.19948	2.36221	0.534756	0.273263	0.291205	0.930652	0.507263	0.292338	0.340667	1.26784	0.620419	1.47462	2.9471	3.21566	0.612624	4.74314	1.69411	2.04346
HCAR1	0.245352	0.789171	0.150463	0.0393774	0.279527	0.73386	4.44045	0.311439	1.72796	0.195028	0.532071	0.0216367	2.57062	0.416345	0.815352	8.88123	5.12351	3.41779	2.50588	0.631938	0.444612	0.276761	1.82511	3.60011	4.53995	0.519758	0.290738	0.196023	1.53467	5.78872	2.88707	0.00371942	6.85766	0.47143	0.360646
SLC16A1	0.452384	0.0538774	0.706195	0.136892	1.28009	2.44097	0.314703	0.268852	0.00204605	0.189706	0.0687322	0.887078	2.03664	8.81932	1.89508	3.13612	18.1265	0.560246	2.9463	1.14444	0.014148	0.0184927	14.1458	0.48885	4.06631	0.633587	2.43931	0.458298	2.00875	6.72673	1.83657	0.933952	8.68258	0.321242	0.553372
PLA2G6	0.672114	0.586108	0.850602	0.446942	0.201796	1.25942	2.124	0.58281	2.60986	1.85807	3.46429	0.21537	0.870256	2.88939	0.716389	0.302727	0.169836	7.22631	4.17108	0.421102	0.312452	0.137997	2.18344	0.818053	3.08724	1.55269	1.0603	0.222286	1.10314	1.00402	3.49992	0.51605	2.89356	0.682108	0.574718
PARK7	3.71139	5.74009	3.02977	0.639481	8.75349	0.466217	5.29781	1.878	1.96671	2.21408	3.91424	1.73134	2.74348	0.0642863	0.380647	0.0465024	0.00940256	0.00600453	0.71079	3.09185	3.43105	3.07157	0.267915	5.24851	1.02446	5.13872	0.273952	7.93089	1.06766	0.205966	0.202472	0.916968	0.175266	0.976122	1.07864
ATF2	3.38632	2.01843	1.72282	2.99601	2.21308	0.711385	2.07909	1.44064	1.05681	2.01212	0.995783	0.983173	0.154464	0.0988999	0.703883	0.0438692	0.0198374	0.0131212	0.555357	1.72632	1.27524	2.29113	1.15509	1.57317	0.967306	2.6673	4.23125	1.82831	1.00854	0.0641792	0.123117	0.942106	0.119014	0.773198	1.35109
ACOT1	0.125141	0.0809185	0.105561	0.259864	0.403294	8.39992	0.0941526	0.0602736	0.182811	0.0919235	0.0431761	0.695535	1.78303	2.15335	1.56556	20.9279	13.9768	24.1178	1.04226	0.95945	0.551496	0.450079	0.717695	0.234343	0.363566	0.209406	5.17492	0.224307	3.20953	6.30102	3.90093	0.274657	23.5631	0.920932	2.01079
STK11	0.614232	0.338786	0.72737	0.188524	0.250258	10.1128	0.609763	0.527455	0.601748	0.782497	0.332874	0.363182	0.198125	0.492121	0.382231	4.64843	1.04695	1.81545	0.885386	0.954109	0.161182	0.686817	6.56126	0.955159	0.942407	0.47357	0.481115	0.614574	0.950498	4.51698	2.22179	1.09951	17.6024	2.32982	3.10388
NCOA3	2.08102	3.21484	1.10711	1.0561	1.10326	0.570782	0.718748	3.88372	1.92682	0.763255	0.673955	0.168354	3.86327	0.168936	1.69452	0.0609607	0.126238	0.00906085	0.28211	0.457273	0.464438	0.477741	0.0748567	3.6032	2.81763	1.41004	1.87911	1.63516	1.33756	0.272796	1.83354	3.03271	0.507044	1.21714	3.1683
PANX2	0.243473	0.568697	0.118954	0.0807489	0.136798	1.5321	0.166885	0.248362	5.58384	1.44643	1.20485	0.412504	0.94861	4.0621	0.78943	4.64503	14.268	12.0712	24.4758	0.76707	0.226141	0.129032	10.6194	5.82444	1.4986	0.286711	0.60505	0.33501	0.176909	1.67287	3.23282	0.50369	3.3345	1.9261	0.853368
KDM3B	1.70722	8.46376	1.23183	2.16781	5.05742	0.336156	2.66016	1.47752	1.49304	0.989958	1.25821	2.47753	0.826834	0.0178266	0.247891	0.173964	0.0651114	0.0335704	0.0566118	2.12473	3.69567	6.50531	0.558781	1.18216	1.13014	1.51143	0.530318	3.60547	1.26994	0.307193	0.259261	1.13078	0.12493	1.03081	1.00534
PRDX1	0.830866	1.87009	9.8146	4.90117	5.93907	1.04842	4.2244	0.757138	4.0592	4.75184	0.578315	2.79576	2.75683	0.830872	0.424318	0.0216602	0.0262659	0.0113049	0.144387	8.16841	17.5115	8.97281	0.129196	0.62872	0.830129	7.29845	2.74445	11.0718	2.83388	6.54399	0.308324	3.27974	0.199118	4.18329	1.0013
PARP4	2.7521	4.21991	1.66365	0.958148	3.92948	0.234489	1.31609	0.656759	2.33899	1.05793	6.06585	5.03184	3.5344	0.284278	0.155016	0.154989	0.146363	0.0791574	0.282	1.69068	5.62912	4.61891	0.10899	6.03725	1.3745	1.06371	1.10901	2.95062	1.21666	1.21659	0.291611	0.0801821	0.543069	1.59836	0.554896
PARP6	0.699127	0.527261	0.518667	0.608914	0.66849	2.15644	0.109475	0.140681	0.165226	0.417849	0.114899	3.39805	1.40241	4.3063	10.4702	3.94013	4.08728	6.08442	1.23957	0.967959	0.343928	0.489645	1.58501	0.674024	1.3128	0.315505	3.78444	0.265522	1.66912	1.68954	1.04924	0.394618	2.61572	0.730005	1.10072
PARP8	1.78808	0.969813	7.58772	1.94268	0.279754	0.890282	3.22315	1.71646	1.67378	1.83447	0.242157	1.84768	0.664539	0.10675	0.434653	0.117057	0.0642563	0.185094	1.16754	1.1877	6.16206	2.67521	0.789575	0.370869	1.43014	4.14769	1.06046	1.8313	4.35692	0.75207	0.482892	1.03909	1.047	2.25207	1.3433
PARP10	0.728611	0.25991	1.13876	0.760218	0.439108	0.899101	2.9985	3.49099	1.0814	10.648	2.06367	1.20562	0.198	3.61988	0.916408	1.30663	1.18852	12.4039	3.08304	0.483807	0.494613	0.478611	1.84262	0.219645	0.233953	0.235653	1.25311	0.254095	1.1426	3.38745	4.67567	0.583291	1.15619	1.47117	1.12675
OIP5_AS1	3.35689	2.49642	1.08443	2.01169	4.16808	1.02615	1.81602	1.06511	1.21599	4.07895	1.21089	0.811232	1.09024	0.0890139	0.664157	0.147517	0.0209551	0.0123551	0.379473	2.87974	2.88855	1.36075	0.626686	3.29181	0.750344	2.07275	0.20603	1.75984	1.65126	0.437723	0.469884	3.20999	0.324276	1.34661	1.16252
FGF21	0.111155	0.0207103	0.00990416	0.284698	0.00398947	1.2668	0.143559	2.30265	4.62747	0.824434	0.725935	0.193185	1.01202	22.9695	5.41652	29.0541	20.641	255.091	25.0079	0.325766	0.0666845	0.00702666	6.23983	1.19143	1.33011	0.149589	3.67916	0.561158	0.425679	3.81674	0.448003	0.0484827	0.807223	0.696733	0.427802
CREB1	0.662094	6.27632	6.02963	3.63807	8.92586	0.238976	0.893285	2.14982	1.30354	1.38479	2.85865	5.1471	0.116399	0.00281748	0.116333	0.00507115	0.0102917	0.048188	0.120962	1.82716	6.5445	11.5867	4.44962	2.31441	4.3809	0.189961	0.857528	1.61427	1.60673	0.155088	0.00164507	0.501171	0.121879	0.267339	1.11946
CREB3	2.66998	2.95917	2.33051	1.39329	2.11303	1.51397	4.19541	1.72582	4.63271	6.17063	4.15218	2.73083	6.82472	0.338113	0.135322	0.0106075	0.00142526	0.000910746	0.384223	0.995208	5.9968	1.93057	0.950542	2.19257	0.518374	4.85939	0.885251	2.86015	2.44494	0.869063	0.283074	0.310918	2.56803	3.2315	0.670326
ASAH2	0.692376	0.727549	0.300084	0.285419	0.307728	1.07316	1.58087	0.444936	1.0772	2.28315	0.492765	0.641946	1.87228	2.35852	0.538237	1.32332	2.76751	1.3842	1.13438	0.355089	1.60985	0.686646	1.88067	1.03052	0.308722	1.99707	2.12484	0.785594	0.566566	0.688567	0.842798	0.370926	2.83309	0.900584	0.76602
MEG8	0.710731	0.0990244	0.0699763	0.473378	0.437144	1.26176	0.261358	3.04304	0.441783	0.238185	0.294714	2.41922	0.901068	2.47016	1.10979	1.99056	3.96928	6.43252	0.774933	0.739671	0.426104	0.486216	1.77372	0.098527	0.118389	0.635264	1.78643	0.624466	1.88549	3.47866	2.22461	3.12813	3.49763	0.2667	0.331772
CHMP1A	0.681737	0.671163	1.20011	0.604751	0.357221	1.8054	1.06279	0.7537	1.2024	1.12979	0.795418	1.42429	2.71678	4.08506	1.93593	2.78601	1.48545	3.60309	3.24391	0.756117	0.321646	0.688168	2.28457	0.778582	0.259446	0.98055	1.21734	0.70919	0.890146	2.95626	2.13597	1.47485	2.25115	1.46935	0.953777
SRSF9	4.34888	3.80899	1.63923	1.89847	4.91763	0.14812	1.75098	1.59179	2.37179	0.527281	2.59544	1.72477	2.73513	0.293547	0.115934	0.0939886	0.141183	0.0270199	0.0582922	1.44935	5.04443	2.1985	0.308241	3.09555	2.80208	3.83594	0.754177	7.56045	0.442867	0.404233	0.258759	1.29794	0.155302	0.519795	0.730408
ADAMTS13	0.280603	0.555904	0.268805	0.377991	0.28195	1.36954	0.619898	0.600914	0.486944	1.69052	4.40358	0.303872	1.4944	3.89376	1.90014	8.05892	5.4265	13.0487	4.09797	0.207446	0.271235	0.0462204	2.98324	0.987105	0.827549	0.246798	1.4317	0.165893	0.74346	2.19775	3.84251	0.392285	5.52689	0.419589	0.499354
CDC25A	0.00168497	0.020634	0.173395	0.0236784	0.328448	0.75448	0.0932353	0.184006	0.679498	0.41223	0.00586842	1.18802	2.15698	1.59905	15.5498	21.0256	161.976	180.673	0.371735	74.1553	0.0057377	0.874097	0.0678497	1.698	2.23111	3.6766	99.4599	1.71838	0.283778	23.6722	138.776	1.14404	5.83922	0.2028	2.10696
ADIPOQ	0.0536182	0.0453429	0.0185637	0.0334177	0.0329841	2.41414	0.259706	0.163208	0.414065	0.391363	0.451101	0.136088	1.02179	3.3606	0.978676	3.35354	4.11946	7.23307	0.676731	0.0516616	0.0615641	0.025067	2.60311	0.689766	2.19885	0.338526	9.35368	0.370924	2.09399	3.64722	7.20729	0.310279	4.38621	0.325489	0.61316
CISD3	0.278407	0.185994	0.523065	0.300335	0.33446	3.4736	0.233899	0.439376	0.45313	0.430877	0.252686	0.247568	0.910335	5.43269	2.45838	3.90803	8.99723	16.4785	0.973549	0.390416	0.274645	0.282719	1.70595	0.393813	0.874545	0.594659	3.18715	0.846032	2.16619	7.10145	8.78166	0.358628	11.6971	1.11311	1.75977
MS4A15	0.00791909	0.633115	0.11953	0.120855	0.0488563	0.050635	0.151943	0.41254	0.126245	0.346689	0.958722	2.48657	0.141712	10.9932	1.38311	0.308897	378.449	114.447	12.6464	0.0958398	0.0284174	0.0925377	28.4738	0.0530002	4.33455	1.46584	5.6145	0.00382812	3.90918	14.7468	0.714345	0.0179987	6.11663	0.124835	0.0756426
KLHDC3	0.674669	0.686446	0.451932	0.00979231	0.677689	1.64599	0.733541	0.771757	0.403218	1.52938	0.301332	0.583484	5.91242	6.19203	1.32272	5.35677	15.568	62.388	2.33504	0.298187	0.386683	0.570927	0.150933	0.0100559	1.00286	0.937017	10.3793	2.07689	0.671183	10.1061	9.96409	0.474677	1.72005	0.442648	0.997153
TERT	0.104849	0.0525948	0.0589509	0.331426	0.223634	3.93999	0.0667989	0.0739289	0.237591	0.200796	0.204298	5.46406	3.46266	669.223	82.702	258.523	123.137	2072.81	1310.55	0.894066	0.210217	0.254098	59.1904	1.00695	0.378689	0.0657894	0.780961	0.0561056	0.229078	9.28486	14.6039	0.229511	14.1922	1.29871	1.30612
