# Supplementary material for: Identification and validation of the biomarkers related to ferroptosis in calcium oxalate nephrolithiasis
Source: Aging (Albany NY). 2024 Mar 25;16(7):5987–6007. doi: 10.18632/aging.205684 (PMC11042938; doi:10.18632/aging.205684)
Supplement: Supplementary Table 7 [file aging-16-205684-s006.xls]

## Sheet: Supplementary Table 7
Supplementary Table 7. Differentially expressed genes between two clusters.
id	C1	C2	logFC	P.Value	adj.P.Val
SLFN14	0.386897	16368421059	35.3002	0.00241368	0.00976436
XLOC_l2_010319	0.410819	1.79629e+07	25.3819	0.000387718	0.00350949
XLOC_l2_008696	0.441704	5.58443e+06	23.5918	0.00241368	0.00976436
DEFA3	0.170597	16007.7	16.5178	8.69e-05	0.00193397
XLOC_003657	0.296861	4635.94	13.9308	0.000485272	0.00391131
XLOC_005182	0.0750846	978.953	13.6704	0.00011353	0.00209946
LOC100144597	0.725547	9216.48	13.6329	0.0016646	0.0078152
XLOC_012630	0.0934599	932.486	13.2844	0.00011353	0.00209946
SLC36A2	0.0403035	309.757	12.9079	6.69e-06	0.00141763
XLOC_007640	0.0883281	558.777	12.6271	3.65e-05	0.00157127
XLOC_003048	0.459756	2830.32	12.5878	0.00137324	0.00698991
PRAMEF20	0.271221	1626.76	12.5502	0.000307539	0.00316712
XLOC_000767	0.393958	1986.55	12.2999	0.000147479	0.00233766
OR51A2	0.116326	573.021	12.2662	1.94e-05	0.00141763
XLOC_011165	0.50413	2471.56	12.2593	0.000604293	0.00441187
DMBT1	0.623739	2535.2	11.9889	0.00200928	0.00872349
XLOC_012537	0.217522	870.075	11.9658	0.00011353	0.00209946
XLOC_003934	0.108123	428.21	11.9514	0.00200928	0.00872349
CYP2A7	0.315108	1134.16	11.8135	0.000307539	0.00316712
LOC286186	0.227839	817.992	11.8099	6.69e-06	0.00141763
FLJ46020	0.165916	571.63	11.7504	0.000147479	0.00233766
ITIH6	0.442041	1420.54	11.65	4.93e-05	0.0016654
XLOC_012120	0.0592999	181.754	11.5817	0.00011353	0.00209946
OR10P1	0.426579	1273.76	11.544	0.000747678	0.00494802
OR9G9	0.182154	533.734	11.5167	0.000485272	0.00391131
C3orf74	0.153474	443.446	11.4966	0.000147479	0.00233766
XLOC_l2_003391	0.130695	373.647	11.4813	6.57e-05	0.00175355
XLOC_005731	0.0931066	258.745	11.4404	4.49e-06	0.00141763
DEFB4A	0.814448	2216.97	11.4105	0.00241368	0.00976436
XLOC_012506	0.730343	1893.4	11.3401	0.000604293	0.00441187
IL25	0.145889	372.079	11.3165	0.00137324	0.00698991
OR2T34	0.164407	391.693	11.2182	0.000747678	0.00494802
OR4D10	0.0819964	191.698	11.191	1.2e-06	0.00141763
XLOC_006448	0.874145	2009.69	11.1668	0.000747678	0.00494802
XLOC_000470	0.174875	383.251	11.0978	0.00112691	0.00624052
XLOC_009363	0.26785	580.383	11.0814	1.39e-05	0.00141763
RGAG1	0.346026	747.906	11.0778	4.93e-05	0.0016654
C19orf20	0.5712	1198.17	11.0345	0.000485272	0.00391131
VRTN	0.222232	449.818	10.9831	0.000747678	0.00494802
LOC100505838	0.235182	460.637	10.9356	0.00137324	0.00698991
LOC100287326	0.986221	1903.64	10.9146	0.000189715	0.00258435
KIR2DS2	0.190463	367.284	10.9132	0.00011353	0.00209946
XLOC_000676	1.19773	2276.25	10.8921	0.000387718	0.00350949
LOC150935	0.128166	241.401	10.8792	0.000147479	0.00233766
TUBB4A	0.355738	664.915	10.8681	0.000147479	0.00233766
XLOC_006818	0.459728	840.519	10.8363	0.000189715	0.00258435
XLOC_013700	0.202528	368.071	10.8276	0.000747678	0.00494802
KIR2DL2	0.26392	473.008	10.8075	0.00011353	0.00209946
LOC100653058	0.54126	965.625	10.8009	0.00200928	0.00872349
XLOC_001814	0.155123	273.877	10.7859	3.65e-05	0.00157127
XLOC_004669	0.571535	1003.47	10.7779	0.000604293	0.00441187
GRIN2D	0.316869	547.525	10.7548	0.00112691	0.00624052
XLOC_010986	0.352244	601.043	10.7367	0.00200928	0.00872349
XLOC_007349	0.155314	258.014	10.698	0.000307539	0.00316712
MIR7-3HG	0.177352	290.514	10.6778	0.000387718	0.00350949
XLOC_009798	0.154192	242.864	10.6212	0.00011353	0.00209946
XLOC_011317	0.13828	216.659	10.6136	3e-06	0.00141763
XLOC_008968	0.322804	497.179	10.5889	0.000485272	0.00391131
XLOC_008667	0.286317	425.446	10.5371	0.000242536	0.00286432
XLOC_l2_016079	1.33727	1889.35	10.4644	0.000920519	0.00556824
OR7E5P	0.187014	260.444	10.4436	6.57e-05	0.00175355
LOC100505570	0.22369	308.669	10.4303	0.000604293	0.00441187
XLOC_l2_006704	0.221277	300.219	10.4059	6.57e-05	0.00175355
XLOC_013943	0.199298	266.474	10.3849	0.000387718	0.00350949
XLOC_003714	0.195996	241.243	10.2654	6.57e-05	0.00175355
XLOC_012395	0.441421	539.96	10.2565	0.00200928	0.00872349
LOC100507058	0.267528	324.083	10.2425	0.00112691	0.00624052
XLOC_007058	0.456708	535.732	10.196	0.000920519	0.00556824
XLOC_008372	0.137141	160.775	10.1952	0.000307539	0.00316712
NFE4	0.397168	459.941	10.1775	0.00011353	0.00209946
MUC3A	0.130025	149.878	10.1708	6.69e-06	0.00141763
XLOC_l2_005403	0.993413	1133.15	10.1557	0.000747678	0.00494802
XLOC_l2_013963	0.38083	431.952	10.1475	0.00137324	0.00698991
XLOC_013778	1.3348	1513.04	10.1466	0.000147479	0.00233766
OR5AU1	0.0933455	105.394	10.1409	0.00011353	0.00209946
XLOC_005524	0.306066	345.481	10.1405	0.000920519	0.00556824
OR5W2	0.74832	844.277	10.1398	0.000920519	0.00556824
XLOC_013773	1.01488	1126.14	10.1159	0.000189715	0.00258435
XLOC_010256	0.0803122	88.6207	10.1078	0.000242536	0.00286432
LOC729815	0.518008	562.859	10.0856	8.69e-05	0.00193397
CEACAM7	0.233827	248.337	10.0526	2.69e-05	0.00147231
XLOC_003833	0.837316	847.648	9.98348	0.0016646	0.0078152
OR7E91P	0.190782	189.23	9.954	0.000387718	0.00350949
OR2T8	0.299048	287.085	9.90688	0.000387718	0.00350949
XLOC_009411	0.271433	258.852	9.89731	0.000920519	0.00556824
XLOC_009566	0.07754	73.0398	9.87953	0.000604293	0.00441187
XLOC_003073	0.123203	113.693	9.84989	1.39e-05	0.00141763
XLOC_005117	0.222283	203.931	9.84147	0.00137324	0.00698991
XLOC_007621	0.146195	131.083	9.80837	0.00112691	0.00624052
XLOC_013779	1.20467	1065.41	9.78856	0.000604293	0.00441187
LOC100506563	0.47656	421.446	9.78847	0.00112691	0.00624052
TMCC2	0.325836	287.471	9.78506	0.0016646	0.0078152
XKR7	0.48867	428.993	9.77788	6.57e-05	0.00175355
XLOC_012249	0.218853	187.157	9.74007	0.00011353	0.00209946
OR10H4	0.098618	84.0124	9.73453	8.69e-05	0.00193397
XLOC_014014	0.27723	234.057	9.72156	1.94e-05	0.00141763
GAGE7	0.479905	391.453	9.67188	4.93e-05	0.0016654
PF4	1.09122	887.227	9.66722	0.00200928	0.00872349
XLOC_l2_000038	0.107354	86.3165	9.65112	0.0016646	0.0078152
XLOC_010043	0.187605	146.916	9.61308	2.69e-05	0.00147231
XLOC_004611	0.220182	167.537	9.57156	0.000189715	0.00258435
XLOC_002087	0.682996	519.558	9.57119	0.00112691	0.00624052
XLOC_011198	0.168942	126.291	9.54601	0.000189715	0.00258435
GABRA3	0.625698	464.125	9.53483	8.69e-05	0.00193397
SSX4B	0.161571	119.126	9.5261	2.69e-05	0.00147231
XLOC_004959	0.550266	404.885	9.52317	0.000189715	0.00258435
LOC100134663	0.574036	420.853	9.51796	0.000747678	0.00494802
XLOC_012147	0.506333	370.712	9.516	0.000307539	0.00316712
LOC100130815	0.379164	276.688	9.51122	0.00241368	0.00976436
XLOC_009294	0.151522	109.785	9.50094	0.00112691	0.00624052
CETP	0.312987	226.634	9.50004	4.93e-05	0.0016654
XLOC_003852	1.27192	917.344	9.49431	0.000387718	0.00350949
LOC100131726	0.244508	176.078	9.49212	0.0016646	0.0078152
PSG5	0.29514	211.852	9.48744	0.000307539	0.00316712
XLOC_014334	0.566262	403.393	9.4765	0.00200928	0.00872349
SLC32A1	0.276314	195.489	9.46657	1.94e-05	0.00141763
LOC100128703	0.455859	318.685	9.44932	8.69e-05	0.00193397
XLOC_007118	1.26385	870.563	9.42799	0.000387718	0.00350949
XLOC_002798	0.282316	193.127	9.41802	0.00137324	0.00698991
XLOC_007323	1.31431	897.869	9.41605	0.000242536	0.00286432
XLOC_l2_012835	0.184563	124.853	9.40189	8.69e-05	0.00193397
XLOC_009550	0.133243	89.9261	9.39854	0.00200928	0.00872349
XLOC_011978	0.41481	274.158	9.36834	6.57e-05	0.00175355
OR8S1	0.177342	116.507	9.35967	0.000189715	0.00258435
GALNT8	0.482203	315.851	9.35539	0.000387718	0.00350949
XLOC_012387	0.188584	123.075	9.35011	0.000307539	0.00316712
HBG1	0.171778	112.079	9.34976	0.000485272	0.00391131
KRTAP6-3	0.201027	131.125	9.34934	0.000189715	0.00258435
LOC284933	0.294603	191.023	9.34076	0.00241368	0.00976436
INHBC	0.295472	190.236	9.33055	0.000485272	0.00391131
DDX11L2	0.349284	224.267	9.3266	0.000307539	0.00316712
DNAJC5G	0.104228	66.7674	9.32326	0.00011353	0.00209946
LOC650293	0.143108	90.5949	9.30619	0.000387718	0.00350949
XLOC_012765	0.3967	250.075	9.3001	0.000920519	0.00556824
LOC100505786	0.178944	111.727	9.28626	0.000307539	0.00316712
LOC729732	0.932521	581.244	9.28379	0.000747678	0.00494802
LOC100509686	0.195083	118.969	9.25229	0.000747678	0.00494802
XLOC_l2_014820	0.257187	155.924	9.2438	0.000920519	0.00556824
KRT79	0.250079	150.032	9.22867	0.000147479	0.00233766
XLOC_013039	0.117229	69.5939	9.21349	0.000747678	0.00494802
XLOC_l2_011102	0.251436	147.043	9.19183	0.00112691	0.00624052
XLOC_008427	0.208264	120.883	9.18098	0.000485272	0.00391131
XLOC_003387	0.276131	158.984	9.16931	0.00112691	0.00624052
USP17L2	0.598268	342.096	9.1594	0.000307539	0.00316712
XLOC_001752	0.154308	87.8478	9.15305	0.00137324	0.00698991
XLOC_013792	0.355878	201.876	9.14787	0.00137324	0.00698991
LYPD4	0.134844	76.2503	9.14331	9.69e-06	0.00141763
LOC100506891	1.31845	729.628	9.11218	0.00241368	0.00976436
XLOC_012811	0.0996589	54.9071	9.10578	0.000920519	0.00556824
XLOC_008184	0.43545	238.844	9.09935	0.000189715	0.00258435
XLOC_013290	1.29463	705.553	9.09007	0.0016646	0.0078152
XLOC_011780	0.111454	60.321	9.08007	4.93e-05	0.0016654
XLOC_006176	0.161448	87.3178	9.07907	3.65e-05	0.00157127
SLC10A2	0.217335	117.509	9.07863	0.00137324	0.00698991
LOC100652755	0.218437	117.926	9.07645	4.93e-05	0.0016654
XLOC_l2_011399	0.643935	347.492	9.07585	0.000747678	0.00494802
FAM75A2	0.27873	150.063	9.07249	0.000189715	0.00258435
PRAMEF19	0.17283	91.9167	9.05483	2.69e-05	0.00147231
XLOC_013553	0.350585	186.39	9.05434	4.93e-05	0.0016654
XLOC_004069	0.270088	140.138	9.01921	6.57e-05	0.00175355
XLOC_009250	0.395972	204.3	9.01108	0.000189715	0.00258435
LOC100652913	0.389593	200.886	9.0102	0.000604293	0.00441187
LOC100129603	0.250591	126.415	8.97862	0.0016646	0.0078152
C15orf26	0.153275	77.2111	8.97654	8.69e-05	0.00193397
XLOC_l2_014057	0.32935	165.345	8.97164	0.000485272	0.00391131
XLOC_013549	0.715625	358.642	8.96913	0.000387718	0.00350949
FAM5B	0.0456234	22.6818	8.95755	0.00011353	0.00209946
WFDC10A	0.332204	164.587	8.95256	0.0016646	0.0078152
XLOC_007680	0.049421	24.4224	8.94886	1.94e-05	0.00141763
XLOC_012383	0.213025	103.368	8.92254	9.69e-06	0.00141763
ARID3C	0.268813	129.145	8.90818	0.000604293	0.00441187
XLOC_l2_008275	0.179048	85.9836	8.90757	0.000147479	0.00233766
XLOC_008587	0.794555	378.235	8.89492	0.00112691	0.00624052
MS4A18	0.386643	182.904	8.88586	0.000387718	0.00350949
IL17B	0.32721	154.494	8.88312	0.000747678	0.00494802
IQCF2	0.141176	66.4431	8.87848	1.94e-05	0.00141763
LOC100505678	0.709548	331.677	8.86866	0.000387718	0.00350949
XLOC_009299	0.199822	92.713	8.85791	0.000604293	0.00441187
XLOC_012222	0.341711	157.768	8.85081	0.000387718	0.00350949
XLOC_005359	0.0847539	39.0438	8.8476	6.99e-07	0.00141763
NMBR	0.286074	131.312	8.84239	0.000920519	0.00556824
XLOC_l2_015520	0.861522	384.371	8.8014	0.000242536	0.00286432
XLOC_006331	2.97252	1321.28	8.79604	0.0016646	0.0078152
XLOC_003590	0.3418	151.742	8.79425	0.0016646	0.0078152
XLOC_005462	0.316649	140.1	8.78936	0.000387718	0.00350949
XLOC_014326	0.391394	173.171	8.78936	0.00137324	0.00698991
LOC100134138	0.96336	425.073	8.78542	0.00011353	0.00209946
LOC152024	0.0915835	40.3954	8.78489	0.000242536	0.00286432
PRAMEF4	0.147795	65.1253	8.78348	0.000485272	0.00391131
CCIN	0.472029	207.203	8.77795	0.000147479	0.00233766
LOC100653149	2.21449	971.313	8.77682	0.00137324	0.00698991
MUC12	1.70666	745.222	8.77035	0.00241368	0.00976436
OR10T2	0.138666	60.1927	8.76183	0.000387718	0.00350949
OR52A5	0.201269	86.97	8.75525	0.00200928	0.00872349
XLOC_006329	1.24285	536.438	8.75361	0.000387718	0.00350949
LOC100507236	0.110146	47.2097	8.74351	0.000920519	0.00556824
XLOC_012358	0.141953	60.1125	8.72611	6.57e-05	0.00175355
XLOC_008510	0.226848	95.8625	8.7231	0.000147479	0.00233766
LOC158572	1.42906	603.68	8.72257	0.000387718	0.00350949
XLOC_l2_006196	0.137554	57.892	8.71722	6.57e-05	0.00175355
XLOC_l2_004327	0.278718	116.89	8.71213	0.000242536	0.00286432
NHLH1	0.204543	84.5258	8.69084	0.000920519	0.00556824
DUXA	0.153769	62.9173	8.67654	0.000485272	0.00391131
PDILT	0.189291	77.3862	8.67533	0.00137324	0.00698991
RTEL1	0.662767	270.526	8.67305	0.000189715	0.00258435
PRKACG	0.460028	187.674	8.67229	0.000242536	0.00286432
XLOC_006652	0.291862	118.184	8.66153	1.94e-05	0.00141763
OR7A17	0.248705	100.61	8.66012	0.000485272	0.00391131
LOC100653268	0.176511	71.297	8.65794	0.00011353	0.00209946
XLOC_l2_011361	0.0949516	38.3211	8.65673	4.49e-06	0.00141763
XLOC_009873	0.0946247	38.1139	8.65388	0.00011353	0.00209946
LOC374890	0.274566	110.547	8.65329	0.000147479	0.00233766
FBXL14	0.526242	210.276	8.64234	0.00011353	0.00209946
XLOC_013811	0.202035	80.6834	8.64152	0.00112691	0.00624052
XLOC_000702	0.236609	92.9254	8.61743	0.000242536	0.00286432
LOC100132790	0.543142	212.641	8.61288	0.000307539	0.00316712
GPR149	0.249925	96.7536	8.59667	0.00011353	0.00209946
SCGB3A2	0.329584	127.515	8.5958	0.000147479	0.00233766
XLOC_l2_014372	2.08115	782.924	8.55535	0.000147479	0.00233766
LOC645202	0.925846	346.392	8.54742	0.00137324	0.00698991
LOC100653063	0.355111	132.457	8.54304	0.000189715	0.00258435
XLOC_l2_011891	0.444356	165.372	8.53978	0.000189715	0.00258435
OR1A2	0.0901588	33.5453	8.53942	2.69e-05	0.00147231
LOC100507003	0.29397	109.173	8.53673	1.94e-05	0.00141763
CYP17A1	0.0722824	26.8288	8.53592	6.99e-07	0.00141763
CREB3L3	0.344922	127.744	8.53277	0.000189715	0.00258435
ODF4	0.635684	234.87	8.52934	3.65e-05	0.00157127
XLOC_013470	0.195969	72.291	8.52705	8.69e-05	0.00193397
XLOC_l2_006267	0.699665	257.829	8.52554	0.000747678	0.00494802
OR5F1	0.282033	102.793	8.50967	0.000307539	0.00316712
OR1D5	0.41302	150.392	8.5083	0.00137324	0.00698991
LOC100505928	0.28222	102.722	8.50771	6.57e-05	0.00175355
XLOC_012421	0.0917629	33.3899	8.50728	6.57e-05	0.00175355
OR4F4	0.0869427	31.1323	8.48413	3e-06	0.00141763
OR8A1	0.116463	41.6762	8.4832	6.57e-05	0.00175355
XLOC_001263	0.320472	114.244	8.47771	8.69e-05	0.00193397
XLOC_l2_014011	0.209833	74.3023	8.46802	0.000147479	0.00233766
XLOC_005639	0.530643	187.863	8.46772	0.000920519	0.00556824
XLOC_005276	0.27679	97.8165	8.46514	0.000147479	0.00233766
XLOC_001378	0.322217	112.929	8.45317	0.000920519	0.00556824
LOC151475	0.529215	185.446	8.45293	0.000242536	0.00286432
OR10H5	0.258971	90.1063	8.44269	0.0016646	0.0078152
TERT	0.702218	243.348	8.43689	0.000387718	0.00350949
XLOC_008341	0.970693	334.386	8.42828	0.000189715	0.00258435
CACNG7	0.3071	105.5	8.42432	0.0016646	0.0078152
XLOC_013291	1.17043	400.983	8.42036	0.00112691	0.00624052
LOC388942	0.297031	100.99	8.40938	0.000747678	0.00494802
LOC100506075	0.433015	146.779	8.40501	0.0016646	0.0078152
XLOC_012036	0.328639	111.297	8.40369	6.57e-05	0.00175355
XLOC_011219	0.254593	85.485	8.39134	0.0016646	0.0078152
KIR3DL2	0.313212	104.629	8.38393	6.57e-05	0.00175355
MUC5AC	0.183777	61.2385	8.38034	0.000147479	0.00233766
XLOC_005129	0.459165	152.106	8.37185	0.00241368	0.00976436
XLOC_004983	0.210367	69.1007	8.35965	0.000189715	0.00258435
XLOC_000280	0.142128	46.5825	8.35645	2.69e-05	0.00147231
RASL10B	1.0331	338.538	8.3562	4.93e-05	0.0016654
XLOC_013119	0.627324	205.035	8.35244	0.000604293	0.00441187
XLOC_002927	0.303814	99.2861	8.35226	0.0016646	0.0078152
DEFB105B	0.0744246	24.3129	8.35173	1.94e-05	0.00141763
OR1N1	0.445485	144.871	8.34517	0.000747678	0.00494802
OR1D2	0.216024	70.2209	8.34456	6.57e-05	0.00175355
TMEM229A	0.372261	120.623	8.33998	0.000387718	0.00350949
XLOC_008669	0.490404	158.086	8.33252	0.00200928	0.00872349
TMEM95	0.154995	49.9073	8.33089	3e-06	0.00141763
XLOC_008402	0.151494	47.994	8.30745	0.00200928	0.00872349
XLOC_003131	0.261671	82.6163	8.30253	0.00011353	0.00209946
XLOC_l2_008624	0.114144	36.0097	8.30139	3.65e-05	0.00157127
XLOC_001223	0.345954	109.061	8.30033	0.000485272	0.00391131
XLOC_012761	0.366102	115.015	8.29536	0.000387718	0.00350949
XLOC_l2_002207	0.376257	118.09	8.29395	0.0016646	0.0078152
XLOC_011106	0.326314	101.381	8.27931	0.00200928	0.00872349
XLOC_007866	0.49183	151.914	8.27088	0.00137324	0.00698991
PRG1	0.178095	54.9283	8.26876	0.000307539	0.00316712
XLOC_007943	0.187177	57.7006	8.26803	0.000307539	0.00316712
XAGE1A	0.337384	103.935	8.26708	0.0016646	0.0078152
LOC100130314	0.287201	88.0334	8.25985	0.00241368	0.00976436
LOC100130264	0.178235	54.026	8.24373	0.000147479	0.00233766
LOC100505661	0.423759	128.016	8.23887	0.000147479	0.00233766
C20orf62	0.696464	209.522	8.23284	0.000604293	0.00441187
LOC645645	0.806062	242.478	8.23275	0.000387718	0.00350949
XLOC_000653	0.584294	175.578	8.2312	0.000485272	0.00391131
OR6M1	0.0942497	28.3117	8.23069	6.57e-05	0.00175355
XLOC_012072	0.430451	128.026	8.21637	4.93e-05	0.0016654
RPH3A	0.227116	67.5476	8.21633	4.93e-05	0.0016654
C4BPA	0.560854	166.641	8.2149	0.000747678	0.00494802
GOLGA6L6	0.475442	141.236	8.21463	0.00011353	0.00209946
XLOC_003296	0.084381	24.8667	8.20308	3.65e-05	0.00157127
XLOC_000572	0.459619	135.295	8.20146	4.93e-05	0.0016654
ASB10	0.289731	85.1216	8.19867	0.000387718	0.00350949
LOC100134285	0.43371	126.377	8.18678	0.000307539	0.00316712
OR2B11	0.260399	75.5612	8.18078	0.000242536	0.00286432
XLOC_l2_015842	0.30277	87.7883	8.17967	6.69e-06	0.00141763
PIPOX	0.290509	83.0933	8.16	0.000147479	0.00233766
KIR2DL4	0.23702	67.1068	8.1453	6.57e-05	0.00175355
LOC100653051	0.298837	83.8909	8.13301	8.69e-05	0.00193397
XLOC_012416	0.264067	74.0316	8.13109	0.00137324	0.00698991
LOC100506053	0.546598	152.743	8.12641	8.69e-05	0.00193397
LOC649294	0.6205	173.358	8.12611	0.000307539	0.00316712
HRG	0.136409	38.104	8.12586	4.93e-05	0.0016654
SNORD91B	0.214859	59.5027	8.11342	4.93e-05	0.0016654
XLOC_001882	0.413066	114.204	8.11102	0.00241368	0.00976436
OR7A10	0.222357	61.3721	8.10856	0.000147479	0.00233766
XLOC_013162	0.423619	116.539	8.10383	6.57e-05	0.00175355
XLOC_l2_015101	0.938972	256.152	8.0917	0.000920519	0.00556824
SLAMF9	0.639494	174.034	8.08822	0.000189715	0.00258435
XLOC_002581	0.374863	101.313	8.07824	0.0016646	0.0078152
LOC100506069	0.272964	73.6473	8.07578	0.000747678	0.00494802
LOC286238	0.244664	65.9688	8.07484	8.69e-05	0.00193397
XLOC_007051	0.21748	58.627	8.07454	1.39e-05	0.00141763
CD164L2	0.559897	150.712	8.07242	0.0016646	0.0078152
XLOC_012507	0.15481	41.4841	8.06592	1.2e-06	0.00141763
LOC100507108	0.340658	91.257	8.06547	0.00112691	0.00624052
XLOC_012857	0.19562	52.3096	8.06288	6.57e-05	0.00175355
PADI6	0.972197	259.88	8.06238	0.00137324	0.00698991
XLOC_007101	0.202674	54.1289	8.0611	0.00112691	0.00624052
KRT74	0.327249	87.3835	8.06083	0.000242536	0.00286432
XLOC_006391	0.256851	68.4424	8.05782	0.000485272	0.00391131
LOC100289333	0.0880258	23.4485	8.05735	0.000485272	0.00391131
XLOC_001632	0.304401	79.8683	8.0355	0.000920519	0.00556824
XLOC_005567	0.33864	88.022	8.02197	0.000604293	0.00441187
C11orf40	0.493559	127.747	8.01585	0.00112691	0.00624052
XLOC_001516	0.176458	45.6231	8.01429	1.39e-05	0.00141763
XLOC_l2_001520	0.294624	75.8957	8.009	0.000604293	0.00441187
ACCSL	0.335445	85.9993	8.00211	0.00137324	0.00698991
XLOC_005246	0.310117	78.767	7.98864	0.00200928	0.00872349
XLOC_000580	0.252321	63.4249	7.97365	6.57e-05	0.00175355
XLOC_010665	0.250798	62.8709	7.96972	1.94e-05	0.00141763
FAM75A3	0.340291	84.8532	7.96206	0.000189715	0.00258435
XLOC_l2_008550	0.489591	120.626	7.94475	0.000387718	0.00350949
LOC389023	0.187645	46.1516	7.94223	0.00200928	0.00872349
LOC144486	0.0726349	17.8359	7.9399	1.94e-05	0.00141763
F7	0.137828	33.7867	7.93744	6.57e-05	0.00175355
XLOC_004413	0.153252	37.4273	7.93204	2.69e-05	0.00147231
XLOC_001067	0.202499	49.2921	7.9273	0.000307539	0.00316712
ALAS2	0.256125	62.3408	7.92719	0.000189715	0.00258435
XLOC_003093	0.200995	48.7494	7.92208	0.000604293	0.00441187
XLOC_010141	0.548836	131.69	7.90655	0.00112691	0.00624052
XLOC_010851	0.247919	59.367	7.90365	0.00011353	0.00209946
XLOC_004576	0.204452	48.9055	7.90209	0.00011353	0.00209946
XLOC_010908	1.12518	268.294	7.89752	0.000307539	0.00316712
XLOC_011235	0.206703	49.1359	7.89307	8.69e-05	0.00193397
XLOC_001873	0.195181	46.3734	7.89234	6.57e-05	0.00175355
XLOC_001852	0.123951	29.4334	7.89154	2.69e-05	0.00147231
XLOC_000835	0.251988	59.7404	7.88921	0.000387718	0.00350949
XLOC_l2_013849	0.305849	72.031	7.87965	0.000485272	0.00391131
XLOC_007607	0.50925	119.016	7.86856	0.00241368	0.00976436
OR4P4	0.100298	23.4053	7.8664	8.69e-05	0.00193397
OR5AP2	1.87972	436.902	7.86065	0.000387718	0.00350949
XLOC_l2_000342	0.229696	53.0766	7.85221	8.69e-05	0.00193397
NANOS2	0.378528	87.3638	7.85049	0.0016646	0.0078152
MAGEA1	0.213253	49.2026	7.85002	0.000604293	0.00441187
XLOC_014356	0.542899	125.248	7.84988	0.00112691	0.00624052
XLOC_l2_009302	0.129584	29.7621	7.84344	0.00011353	0.00209946
OR13C4	0.358052	81.9988	7.83929	0.00241368	0.00976436
XLOC_007374	0.161546	36.9958	7.83927	0.000307539	0.00316712
XLOC_006193	0.242462	55.4321	7.83682	0.000189715	0.00258435
XLOC_005083	0.349784	79.9237	7.83601	6.57e-05	0.00175355
AVPR1B	0.315223	71.993	7.83534	0.000485272	0.00391131
INSC	0.153197	34.9376	7.83325	3.65e-05	0.00157127
XLOC_007278	0.251585	57.2179	7.82928	0.000242536	0.00286432
LELP1	0.578807	130.495	7.8167	0.00112691	0.00624052
FLJ31713	0.227131	51.1612	7.81538	0.00011353	0.00209946
RNU105C	0.182224	41.0211	7.81451	6.57e-05	0.00175355
XLOC_000226	0.639172	143.812	7.81377	0.00112691	0.00624052
XLOC_003405	0.503323	112.975	7.81031	0.00137324	0.00698991
LOC100130232	0.414944	92.7317	7.804	0.000604293	0.00441187
OR2M5	0.187253	41.6615	7.79758	0.000147479	0.00233766
MYOD1	0.250151	55.4539	7.79235	0.000387718	0.00350949
LINC00028	0.217329	48.157	7.79172	0.000387718	0.00350949
XLOC_008567	0.283072	62.7156	7.79151	0.000387718	0.00350949
XLOC_009680	1.09483	242.496	7.79111	0.00241368	0.00976436
C18orf61	1.04921	232.306	7.79058	0.000604293	0.00441187
OPN4	0.499435	110.577	7.79054	0.0016646	0.0078152
FAM180B	0.452517	99.8855	7.78616	4.93e-05	0.0016654
ASCL1	0.337594	74.4188	7.78423	0.000387718	0.00350949
XLOC_009282	0.237609	52.3262	7.7828	8.69e-05	0.00193397
CHRNA2	1.18292	260.108	7.78061	0.000189715	0.00258435
OR3A4P	0.320104	70.1852	7.77648	0.00011353	0.00209946
XLOC_003044	0.518117	113.38	7.77368	0.000604293	0.00441187
LOC100506422	0.198758	43.1637	7.76266	3.65e-05	0.00157127
KRTAP15-1	0.935598	202.144	7.75528	0.0016646	0.0078152
XLOC_001676	0.30192	65.1594	7.75366	0.000604293	0.00441187
XLOC_003314	0.256279	55.1142	7.74857	0.000387718	0.00350949
MUC6	0.447587	95.7678	7.74123	0.000242536	0.00286432
RAB36	0.21406	45.6165	7.7354	0.000147479	0.00233766
CARTPT	0.249677	53.0963	7.7324	0.00011353	0.00209946
XLOC_012229	0.218292	45.9979	7.71917	0.00011353	0.00209946
ZDHHC19	0.314696	66.1974	7.71667	0.0016646	0.0078152
XLOC_012763	0.301224	63.3617	7.71663	0.000307539	0.00316712
XLOC_014332	0.285104	59.9089	7.71514	0.000604293	0.00441187
XLOC_010248	0.442978	92.6788	7.70886	0.00011353	0.00209946
LOC100128751	0.510241	106.673	7.7078	0.0016646	0.0078152
TTTY5	0.320513	66.9885	7.70739	0.000604293	0.00441187
IL10	0.0971162	20.1428	7.69634	0.00011353	0.00209946
LOC401980	0.209685	43.4369	7.69456	0.000242536	0.00286432
RNF175	0.272983	56.378	7.69018	0.000189715	0.00258435
XLOC_000476	0.727109	149.868	7.68731	0.000604293	0.00441187
XLOC_l2_009510	0.28147	57.786	7.6816	0.000920519	0.00556824
XLOC_013711	0.315925	64.7402	7.67894	0.00112691	0.00624052
XLOC_009727	0.140127	28.7025	7.6783	0.00011353	0.00209946
XLOC_007290	0.169085	34.4712	7.6715	3.65e-05	0.00157127
OR5M8	0.302574	61.6444	7.67054	0.000920519	0.00556824
XLOC_012637	0.126458	25.7338	7.66886	0.000747678	0.00494802
XLOC_008337	0.517172	104.203	7.65454	0.000242536	0.00286432
XLOC_000630	0.211981	42.6786	7.65343	0.00011353	0.00209946
TTTY22	0.332042	66.5604	7.64715	0.000242536	0.00286432
LOC100653245	0.423527	84.8468	7.64626	0.00011353	0.00209946
FLJ32742	0.18738	37.4789	7.64397	4.93e-05	0.0016654
ERVH-3	0.347682	69.4211	7.64146	0.00011353	0.00209946
LOC391767	0.482883	96.3697	7.64076	0.000147479	0.00233766
XLOC_001214	0.135415	26.9565	7.6371	0.00011353	0.00209946
OR8G2	0.410794	81.5866	7.63377	4.93e-05	0.0016654
XLOC_002663	0.341575	67.5246	7.62707	0.000387718	0.00350949
ZNF804B	0.290293	57.3108	7.62515	0.00112691	0.00624052
KRT33A	0.55995	110.419	7.62347	0.000920519	0.00556824
XLOC_l2_001954	0.619876	122.195	7.62299	0.00137324	0.00698991
ERVV-2	0.196173	38.5684	7.61915	1.94e-05	0.00141763
XLOC_009202	0.265203	52.0304	7.61611	0.000387718	0.00350949
XLOC_007354	0.240968	47.2717	7.61599	0.00112691	0.00624052
XLOC_001719	0.15396	30.1733	7.61457	0.000604293	0.00441187
PIWIL2	0.155838	30.5127	7.61322	9.69e-06	0.00141763
MGC72080	0.428527	83.7327	7.61026	0.00137324	0.00698991
XLOC_l2_000643	0.567576	110.282	7.60217	0.0016646	0.0078152
XLOC_012724	0.230621	44.7215	7.5993	1.94e-05	0.00141763
XLOC_006153	0.179379	34.5953	7.59142	0.000242536	0.00286432
MUC3	0.175625	33.8152	7.58903	6.57e-05	0.00175355
XLOC_l2_002067	0.355974	68.4842	7.58785	0.00112691	0.00624052
KRTAP19-1	0.474029	90.85	7.58237	0.000387718	0.00350949
XLOC_011474	0.231752	44.359	7.5805	8.69e-05	0.00193397
XLOC_000299	0.661748	126.295	7.5763	0.000920519	0.00556824
XLOC_008388	0.270655	51.5568	7.57356	0.0016646	0.0078152
XLOC_009986	1.06362	202.286	7.57126	0.00112691	0.00624052
XLOC_000017	0.239023	45.3751	7.56861	0.000485272	0.00391131
XLOC_l2_014757	0.141411	26.8127	7.56688	0.000189715	0.00258435
XLOC_004945	0.12434	23.5449	7.56498	0.000485272	0.00391131
LOC100505959	0.136513	25.8114	7.56283	4.93e-05	0.0016654
C1orf189	0.216607	40.9459	7.5625	4.93e-05	0.0016654
LOC100130857	0.172644	32.5774	7.55993	0.000307539	0.00316712
XLOC_001062	0.162454	30.2174	7.53921	1.94e-05	0.00141763
XLOC_006532	0.216095	40.1495	7.53757	0.000147479	0.00233766
C1orf182	0.219263	40.7023	7.5363	0.000307539	0.00316712
RLBP1	0.613316	113.834	7.53608	0.000147479	0.00233766
C15orf50	0.122758	22.5565	7.52158	4.93e-05	0.0016654
XLOC_007681	0.247933	45.5505	7.52137	0.000242536	0.00286432
LOC100128843	0.278906	51.1174	7.51789	0.00200928	0.00872349
SERTM1	0.169391	31.0197	7.51668	0.000387718	0.00350949
LOC100507412	0.597796	109.387	7.51558	0.00200928	0.00872349
OR5I1	0.488594	89.0759	7.51026	0.000307539	0.00316712
XLOC_005955	0.855412	155.465	7.50575	0.00112691	0.00624052
LOC100505531	0.49106	89.2237	7.50538	0.00112691	0.00624052
TTTY13	1.60106	290.771	7.50472	0.00200928	0.00872349
LOC644686	0.0880645	15.9609	7.50176	1.39e-05	0.00141763
XLOC_008993	0.307399	55.6937	7.50126	8.69e-05	0.00193397
FBXL19	0.20782	37.6339	7.50056	0.00011353	0.00209946
XLOC_005121	0.241191	43.6675	7.50024	0.000242536	0.00286432
MAGEA8	0.663136	119.737	7.49635	0.0016646	0.0078152
XLOC_l2_012162	0.287297	51.8079	7.49448	6.57e-05	0.00175355
XLOC_002680	0.516543	92.579	7.48565	0.000747678	0.00494802
DPRX	0.297076	53.0025	7.47909	1.94e-05	0.00141763
XLOC_002860	0.460066	81.9199	7.47623	0.000307539	0.00316712
DEFB107A	0.224925	40.0492	7.47619	0.000387718	0.00350949
C17orf74	0.50837	90.3511	7.47352	0.000747678	0.00494802
XLOC_l2_015876	0.417327	74.1021	7.47219	0.000387718	0.00350949
XLOC_011786	0.94965	168.192	7.4685	0.000485272	0.00391131
REG1A	0.171227	30.2983	7.46719	8.69e-05	0.00193397
LOC100652824	0.631524	111.704	7.46662	0.000387718	0.00350949
XLOC_009631	0.257186	44.9687	7.44997	0.000147479	0.00233766
XLOC_009191	0.224957	39.3281	7.44977	0.000189715	0.00258435
XLOC_008344	0.598272	104.248	7.445	0.000147479	0.00233766
OR6N2	0.173039	30.0344	7.43938	0.000747678	0.00494802
AADACL3	0.138021	23.9301	7.43779	0.000242536	0.00286432
XLOC_007190	0.464377	80.154	7.43133	0.000387718	0.00350949
XLOC_003160	0.28098	48.4406	7.4296	4.93e-05	0.0016654
XLOC_013298	0.437295	75.2839	7.42759	2.69e-05	0.00147231
XLOC_013270	0.38794	66.7713	7.42725	0.000307539	0.00316712
OR2T27	0.366716	62.9773	7.42403	0.000242536	0.00286432
XLOC_l2_012919	0.281712	48.1523	7.41724	0.00200928	0.00872349
SNORD115-23	0.274797	46.849	7.41351	0.00200928	0.00872349
XLOC_011677	0.459964	78.3668	7.41258	0.0016646	0.0078152
ARMC6	0.554006	94.3224	7.41155	0.000147479	0.00233766
XLOC_007487	0.440969	75.0768	7.41155	4.93e-05	0.0016654
XLOC_l2_003139	0.274757	46.5579	7.40473	0.000387718	0.00350949
XLOC_l2_013886	0.133216	22.567	7.40431	1.39e-05	0.00141763
CACNG3	0.220103	37.208	7.40129	0.000147479	0.00233766
XLOC_000884	0.253534	42.8161	7.39983	0.000920519	0.00556824
XLOC_009324	0.523181	88.2863	7.39874	0.000920519	0.00556824
C16orf73	0.503474	84.6787	7.39394	0.000189715	0.00258435
XLOC_004373	0.181425	30.4688	7.39182	6.57e-05	0.00175355
XLOC_010373	0.352827	59.2048	7.39061	0.000242536	0.00286432
SLITRK3	0.119001	19.9657	7.3904	6.57e-05	0.00175355
XLOC_002243	0.351157	58.8786	7.38948	0.000485272	0.00391131
LINGO4	0.638884	107.057	7.38861	0.000604293	0.00441187
LOC100507505	0.770346	128.885	7.38637	4.93e-05	0.0016654
XLOC_013759	0.142581	23.7979	7.3829	8.69e-05	0.00193397
DIRAS1	0.418304	69.3286	7.37276	0.0016646	0.0078152
CCDC163P	0.426789	70.6968	7.37198	0.00137324	0.00698991
LOC729305	0.507452	83.9418	7.36998	0.00241368	0.00976436
LOC100132874	0.360473	59.5291	7.36756	0.000242536	0.00286432
FLJ37505	0.160766	26.5488	7.36754	0.00011353	0.00209946
XLOC_001500	0.1867	30.7322	7.36289	0.000189715	0.00258435
LOC100506869	0.186258	30.5896	7.35959	0.000307539	0.00316712
KLK3	0.256262	42.0796	7.35936	0.00200928	0.00872349
XLOC_005502	0.347372	57.0314	7.35913	0.000485272	0.00391131
MUC5B	0.404036	66.296	7.35829	0.00137324	0.00698991
XLOC_007368	0.212125	34.8047	7.35822	8.69e-05	0.00193397
PRSS1	1.76282	288.197	7.35303	0.00241368	0.00976436
XLOC_014405	0.235146	38.2737	7.34666	0.000147479	0.00233766
XLOC_005195	0.375674	60.9639	7.34233	0.00137324	0.00698991
XLOC_000683	0.288096	46.7038	7.34084	0.00200928	0.00872349
MYLK3	0.190471	30.8299	7.33861	0.00011353	0.00209946
XLOC_l2_002560	0.346981	56.1332	7.33785	0.000604293	0.00441187
POM121L4P	0.614907	99.369	7.33628	0.000387718	0.00350949
PCDH8	0.176645	28.4391	7.33088	0.000147479	0.00233766
FLJ31958	0.974809	155.658	7.31904	0.00241368	0.00976436
XLOC_l2_014055	0.283827	45.2534	7.31687	6.57e-05	0.00175355
KCNK9	0.648543	102.706	7.3071	0.000604293	0.00441187
OR56B4	0.20418	32.1974	7.30096	0.000920519	0.00556824
OR2M2	0.312037	49.1624	7.29969	0.000189715	0.00258435
XLOC_l2_012721	0.346997	54.6699	7.29968	0.000307539	0.00316712
LOC645262	0.452552	71.2593	7.29885	0.000920519	0.00556824
MUC13	0.521499	81.9651	7.2962	0.00200928	0.00872349
LOC646034	0.191146	29.9416	7.29133	0.00200928	0.00872349
TACR2	0.19887	31.1448	7.29102	0.000147479	0.00233766
XLOC_010943	0.96229	150.667	7.29067	0.000920519	0.00556824
OR2V2	0.186058	29.1307	7.29064	3.65e-05	0.00157127
WDR93	0.234847	36.6482	7.28588	1.94e-05	0.00141763
CHKA	0.269419	42.0158	7.28494	0.000604293	0.00441187
SPDYE7P	0.338877	52.7056	7.28105	0.00011353	0.00209946
XLOC_001991	0.091653	14.2348	7.27903	2.69e-05	0.00147231
SIM1	0.457749	70.7424	7.27188	0.000747678	0.00494802
CTXN3	0.247751	38.2179	7.26921	0.00011353	0.00209946
XLOC_011609	0.141907	21.8791	7.26846	0.000147479	0.00233766
NPY	0.225348	34.7222	7.26756	6.57e-05	0.00175355
XLOC_007917	1.03617	159.584	7.26691	0.00112691	0.00624052
PROP1	0.23203	35.7304	7.26669	3.65e-05	0.00157127
KRT73	0.245088	37.7386	7.2666	0.000147479	0.00233766
SH3GL1P3	0.407106	62.6601	7.266	0.00011353	0.00209946
SNORD114-11	0.20876	32.0969	7.26444	0.000387718	0.00350949
XLOC_012077	0.123359	18.9579	7.26379	2.69e-05	0.00147231
XLOC_000845	0.46871	72.0195	7.26355	0.0016646	0.0078152
LOC100506478	0.129997	19.9184	7.25947	1.94e-05	0.00141763
KRTAP10-1	0.34875	53.3216	7.25638	3e-06	0.00141763
XLOC_l2_014566	0.18663	28.3047	7.24472	0.00011353	0.00209946
XLOC_007197	0.395857	59.8781	7.2409	8.69e-05	0.00193397
XLOC_001904	1.36572	206.267	7.23871	0.00112691	0.00624052
XLOC_001908	0.226203	34.1448	7.23791	0.00011353	0.00209946
XLOC_006640	0.391391	59.0151	7.23633	0.000747678	0.00494802
GUCY2F	0.343505	51.7771	7.23584	0.000485272	0.00391131
LOC338588	0.239981	36.1199	7.23373	0.00200928	0.00872349
STXBP1	0.166096	24.979	7.23256	0.000189715	0.00258435
CALR3	0.344708	51.833	7.23235	0.000242536	0.00286432
XLOC_002293	0.202453	30.4299	7.23176	0.00011353	0.00209946
XLOC_013772	0.283679	42.4287	7.22464	0.000189715	0.00258435
OR2T5	0.304805	45.4032	7.21876	0.0016646	0.0078152
ST8SIA2	0.834799	123.626	7.21033	0.00200928	0.00872349
XLOC_000231	0.18373	27.1905	7.20937	0.000920519	0.00556824
USP17	0.421648	62.2949	7.20693	0.000604293	0.00441187
XLOC_l2_015512	0.480818	70.97	7.20557	0.00137324	0.00698991
XLOC_011107	0.348974	51.4866	7.20493	2.69e-05	0.00147231
SPANXA1	0.641673	94.6134	7.20406	0.000307539	0.00316712
XLOC_009345	0.150415	22.1755	7.20387	4.93e-05	0.0016654
C9orf29	0.237617	34.9867	7.20203	8.69e-05	0.00193397
ALOX15	0.297673	43.6295	7.19543	0.000387718	0.00350949
OR1S2	0.151972	22.2716	7.19525	0.000189715	0.00258435
CRMP1	0.20655	30.1807	7.19099	0.000242536	0.00286432
PATZ1	0.219835	32.1113	7.19051	0.000242536	0.00286432
LOC100505844	0.722892	105.337	7.18702	0.000920519	0.00556824
XLOC_005820	0.4918	71.2659	7.17899	0.000920519	0.00556824
C1orf158	0.0904872	13.0713	7.17447	2.69e-05	0.00147231
XLOC_l2_014034	0.206038	29.7267	7.17271	0.0016646	0.0078152
TAF1L	0.167337	24.0842	7.16918	1.94e-05	0.00141763
XLOC_l2_014098	0.508954	72.9393	7.16302	0.000242536	0.00286432
XLOC_011056	0.218285	31.1987	7.15912	0.000387718	0.00350949
HSD17B13	0.673666	96.1118	7.15654	0.00137324	0.00698991
XLOC_l2_006821	0.295752	42.1339	7.15445	0.00011353	0.00209946
PYY	0.65172	92.8114	7.15391	0.000920519	0.00556824
CST11	0.656171	93.0211	7.14734	0.000604293	0.00441187
LOC100506804	0.388112	54.9081	7.1444	4.93e-05	0.0016654
TXNDC2	0.313929	44.3596	7.14267	8.69e-05	0.00193397
MAG	0.26467	37.2978	7.13875	2.69e-05	0.00147231
XLOC_000556	0.302968	42.5644	7.13434	0.000189715	0.00258435
XLOC_l2_007542	0.362127	50.8726	7.13425	0.000485272	0.00391131
CDC6	0.426655	59.7197	7.12899	0.000189715	0.00258435
LYZL1	0.195134	27.2586	7.1261	0.000242536	0.00286432
XLOC_010296	0.336485	46.9124	7.12329	0.000485272	0.00391131
IL37	0.627419	87.3566	7.12134	0.00241368	0.00976436
XLOC_009733	0.191365	26.6393	7.12108	1.94e-05	0.00141763
XLOC_003455	0.135567	18.8591	7.12011	6.57e-05	0.00175355
XLOC_005209	0.290328	40.329	7.11799	0.00137324	0.00698991
FGF3	0.392319	54.3317	7.11362	0.000147479	0.00233766
OR2L8	0.566607	78.4579	7.11342	0.000485272	0.00391131
LOC151009	0.275556	38.0946	7.1111	0.00137324	0.00698991
XLOC_008573	0.329681	45.5342	7.10974	1.39e-05	0.00141763
XLOC_011746	0.4572	62.9037	7.10417	0.000189715	0.00258435
XLOC_009207	0.248109	34.1295	7.1039	0.000387718	0.00350949
OR2H2	0.233706	32.1373	7.10341	3.65e-05	0.00157127
LOC340178	0.327747	45.0237	7.10196	0.000242536	0.00286432
XLOC_002845	0.114706	15.7543	7.10166	0.000604293	0.00441187
XLOC_007390	0.242888	33.3297	7.10038	0.00112691	0.00624052
C9orf173	0.168591	23.1203	7.09948	6.57e-05	0.00175355
XLOC_003965	0.145711	19.9819	7.09944	6.57e-05	0.00175355
XLOC_002151	0.294762	40.3914	7.09835	0.00011353	0.00209946
LOC100506437	0.401832	54.9955	7.09658	0.000242536	0.00286432
C1QTNF1	0.179091	24.4973	7.09579	0.000189715	0.00258435
XLOC_l2_000416	0.452194	61.83	7.09522	0.000604293	0.00441187
XLOC_009575	0.204452	27.9309	7.09395	0.000189715	0.00258435
CEACAM19	0.232713	31.507	7.08098	0.000147479	0.00233766
XLOC_l2_003260	0.238462	32.2263	7.07834	0.000307539	0.00316712
XLOC_007781	0.183817	24.7783	7.07466	6.69e-06	0.00141763
LOC401589	0.174163	23.4761	7.07461	1.94e-05	0.00141763
LOC100188947	0.104242	14.0123	7.07061	1.94e-05	0.00141763
LOC100129129	0.204715	27.5059	7.06998	3.65e-05	0.00157127
OR52A1	0.49021	65.8262	7.06912	0.00137324	0.00698991
XLOC_l2_013162	0.203334	27.3039	7.06911	0.0016646	0.0078152
XLOC_012858	0.380828	51.0915	7.0678	0.000747678	0.00494802
XLOC_013815	0.102722	13.7428	7.06379	8.69e-05	0.00193397
XLOC_002233	0.246176	32.9343	7.06376	8.69e-05	0.00193397
XLOC_010647	0.1771	23.6817	7.06307	3.65e-05	0.00157127
XLOC_012069	0.187958	25.0685	7.05932	4.93e-05	0.0016654
PRSS47	0.105605	14.0651	7.05729	8.69e-05	0.00193397
OR4D11	0.140546	18.696	7.05554	0.00112691	0.00624052
XLOC_011573	0.155106	20.6236	7.05489	6.57e-05	0.00175355
XLOC_012173	0.512477	68.0054	7.05202	0.00011353	0.00209946
MGC39545	0.29921	39.6804	7.05113	0.000920519	0.00556824
XLOC_014063	0.579228	76.6895	7.04875	2.69e-05	0.00147231
LOC100132336	0.414833	54.8225	7.04609	0.0016646	0.0078152
CDRT15P2	0.186067	24.5356	7.04291	0.000242536	0.00286432
XLOC_008292	0.215844	28.3734	7.03841	4.93e-05	0.0016654
OR51G1	0.139471	18.3228	7.03754	1.94e-05	0.00141763
PABPC1L2B	0.261533	34.2607	7.03342	0.000387718	0.00350949
C9orf139	0.332822	43.5945	7.03325	0.000604293	0.00441187
STH	0.265719	34.7851	7.03242	0.000387718	0.00350949
GPR26	0.187053	24.4361	7.02942	0.000189715	0.00258435
XLOC_010384	0.220688	28.8139	7.02861	0.000189715	0.00258435
XLOC_009994	0.358159	46.6097	7.02389	3.65e-05	0.00157127
XLOC_007431	0.151479	19.669	7.02066	0.000189715	0.00258435
MAGEC1	0.210881	27.3562	7.01929	2.69e-05	0.00147231
XLOC_003289	0.338804	43.9383	7.01889	0.000604293	0.00441187
XLOC_008665	0.188939	24.4447	7.01546	2.69e-05	0.00147231
XLOC_013777	0.380233	49.1808	7.01507	6.57e-05	0.00175355
XLOC_013770	0.79514	102.832	7.01486	0.00112691	0.00624052
XLOC_005887	0.20528	26.5439	7.01464	6.69e-06	0.00141763
CTXN1	0.208074	26.9049	7.01463	3.65e-05	0.00157127
CDK5R2	0.198569	25.6639	7.01396	8.69e-05	0.00193397
DZANK1-AS1	0.122838	15.8661	7.01305	2.69e-05	0.00147231
FAM131C	0.159567	20.6082	7.01292	2.69e-05	0.00147231
XLOC_002918	0.178737	23.0819	7.01278	8.69e-05	0.00193397
XLOC_009000	0.397314	51.1782	7.0091	0.000920519	0.00556824
XLOC_006972	0.188983	24.3422	7.00906	0.00137324	0.00698991
LOC100128226	0.494512	63.6513	7.00804	0.000307539	0.00316712
XLOC_010252	0.423337	54.4742	7.00762	0.00112691	0.00624052
XLOC_010703	0.161668	20.7804	7.00605	0.000747678	0.00494802
XLOC_l2_007569	0.397992	50.789	6.99563	8.69e-05	0.00193397
SLK	0.234204	29.8759	6.99508	0.00011353	0.00209946
LTA	0.298385	38.0419	6.99427	8.69e-05	0.00193397
XLOC_007254	0.24646	31.3898	6.9928	0.000485272	0.00391131
CALHM3	0.240248	30.5527	6.99063	8.69e-05	0.00193397
SNAR-E	0.390917	49.5002	6.98443	0.000147479	0.00233766
ERVI-1	0.203638	25.7728	6.9837	0.000604293	0.00441187
SCRT2	0.360229	45.485	6.98033	0.00137324	0.00698991
XLOC_006044	0.304005	38.1892	6.97293	0.000147479	0.00233766
XLOC_003281	0.182655	22.8422	6.96643	4.93e-05	0.0016654
SNORD114-31	0.254517	31.7731	6.9639	0.000387718	0.00350949
HPVC1	0.530229	66.1801	6.96364	0.00241368	0.00976436
XLOC_013864	0.220802	27.4444	6.95761	6.57e-05	0.00175355
XLOC_008559	0.240582	29.8636	6.95571	0.000387718	0.00350949
GSG1L	0.315993	39.2219	6.95562	0.000307539	0.00316712
XLOC_002283	1.05345	130.667	6.95463	0.00241368	0.00976436
C21orf58	0.322179	39.9591	6.95452	2.69e-05	0.00147231
IGFL3	0.341511	42.3451	6.95412	0.000604293	0.00441187
CACNG2	0.422886	52.4306	6.954	0.000307539	0.00316712
XLOC_002003	0.220851	27.3711	6.95344	0.000747678	0.00494802
FLJ44674	0.232241	28.7451	6.95155	0.000189715	0.00258435
MGC16275	0.822356	101.616	6.94914	0.0016646	0.0078152
OR2L3	0.507798	62.6209	6.94625	0.000242536	0.00286432
ALDH3B2	1.29195	159.103	6.94426	0.00137324	0.00698991
PDHA2	0.248738	30.6045	6.94297	6.57e-05	0.00175355
GUSBP3	1.02639	126.134	6.94124	0.000920519	0.00556824
XLOC_011661	0.222475	27.34	6.94123	0.000387718	0.00350949
LOC440896	0.124827	15.3264	6.93995	3.65e-05	0.00157127
LOC100288175	0.561099	68.7689	6.93736	0.00200928	0.00872349
XLOC_004231	0.240763	29.4756	6.93576	0.000147479	0.00233766
XCR1	0.158278	19.3426	6.93317	1.94e-05	0.00141763
KRTAP4-8	0.401763	49.0262	6.93106	0.000307539	0.00316712
XLOC_011787	0.145425	17.6957	6.92699	2.69e-05	0.00147231
XLOC_001115	0.281494	34.1012	6.92058	0.00137324	0.00698991
XLOC_013469	0.29612	35.8496	6.91963	4.93e-05	0.0016654
LRIT2	0.373297	45.1273	6.91753	0.000147479	0.00233766
XLOC_002193	0.375926	45.3289	6.91384	0.000242536	0.00286432
SPDYE4	0.377343	45.4637	6.9127	0.000242536	0.00286432
XLOC_013550	0.565001	67.947	6.91001	0.000485272	0.00391131
XLOC_002111	0.190054	22.8349	6.90868	0.000307539	0.00316712
XLOC_007800	0.296666	35.6176	6.90761	0.000189715	0.00258435
XLOC_011313	0.55534	66.4803	6.90341	0.00200928	0.00872349
SNORD91A	0.246679	29.3965	6.89687	0.000747678	0.00494802
TTC9B	0.401521	47.845	6.89675	0.000307539	0.00316712
XLOC_008990	0.196874	23.4015	6.89319	0.00011353	0.00209946
XLOC_l2_000657	0.191149	22.7054	6.89219	0.000387718	0.00350949
XLOC_013884	0.38549	45.7131	6.88977	0.0016646	0.0078152
MTVR2	0.465379	55.1403	6.88856	0.00112691	0.00624052
C2orf73	0.230798	27.2673	6.8844	0.00011353	0.00209946
MAGEB2	0.176869	20.8808	6.88336	0.000147479	0.00233766
XLOC_001125	0.207454	24.3731	6.87635	0.000387718	0.00350949
NEUROD2	0.264874	31.0698	6.87406	0.000747678	0.00494802
XLOC_006385	0.263491	30.8776	6.87266	0.000307539	0.00316712
XLOC_004407	0.288845	33.6916	6.86595	0.0016646	0.0078152
XLOC_l2_012661	0.373412	43.498	6.86404	0.00112691	0.00624052
XLOC_l2_015100	0.118921	13.8428	6.86298	3.65e-05	0.00157127
XLOC_012616	0.189498	22.0547	6.86276	0.000747678	0.00494802
LOC400620	0.18577	21.5912	6.86079	0.000485272	0.00391131
XLOC_011261	0.250396	29.0401	6.85769	0.000920519	0.00556824
LOC100129213	0.357377	41.3965	6.85592	0.00241368	0.00976436
HPX-2	0.307396	35.6041	6.8558	0.000387718	0.00350949
XLOC_003017	0.326083	37.7122	6.85365	0.00011353	0.00209946
ASB15	0.184914	21.3622	6.85206	0.000242536	0.00286432
TPSG1	0.195743	22.5766	6.84973	0.00011353	0.00209946
COL11A2	0.227981	26.2856	6.84922	4.93e-05	0.0016654
GPR182	0.234677	27.0298	6.84773	0.000147479	0.00233766
GNG13	0.21516	24.6941	6.84261	8.69e-05	0.00193397
XLOC_004126	0.712106	81.6788	6.84173	0.000747678	0.00494802
XLOC_013528	0.3143	35.9986	6.83966	0.00112691	0.00624052
LOC100133145	0.238463	27.2618	6.83697	0.000189715	0.00258435
CORO6	0.152914	17.446	6.83403	4.49e-06	0.00141763
LOC100507334	0.288778	32.8318	6.82899	0.000147479	0.00233766
LGALS16	0.235365	26.7417	6.82804	0.000387718	0.00350949
XLOC_004536	0.229453	26.0408	6.82643	0.000147479	0.00233766
XLOC_009459	0.449852	50.8532	6.82074	0.000920519	0.00556824
XLOC_001942	0.40432	45.702	6.82061	4.93e-05	0.0016654
XLOC_l2_008783	0.163504	18.3865	6.81317	1.94e-05	0.00141763
LOC100506114	0.187412	21.0569	6.81194	0.000147479	0.00233766
XLOC_012683	0.212975	23.9193	6.81135	0.000920519	0.00556824
XLOC_l2_011959	0.115325	12.8858	6.80394	3.65e-05	0.00157127
LOC100506304	0.275931	30.7677	6.80096	0.000147479	0.00233766
XLOC_003525	0.240856	26.8491	6.80056	0.000242536	0.00286432
LY6G5C	0.0851372	9.47566	6.79829	4.93e-05	0.0016654
PRB3	0.309779	34.4737	6.79812	1.39e-05	0.00141763
LGALS14	0.329444	36.608	6.79598	0.00112691	0.00624052
CTRC	0.456219	50.6663	6.79516	0.000189715	0.00258435
OR6P1	0.471755	52.2579	6.79147	0.000147479	0.00233766
XLOC_004991	0.288458	31.9099	6.7895	8.69e-05	0.00193397
FLJ40039	0.307353	33.8045	6.78117	0.000387718	0.00350949
C13orf41	0.293296	32.1875	6.778	0.000242536	0.00286432
TRH	0.195392	21.3983	6.77498	0.000147479	0.00233766
CABP5	0.335175	36.4616	6.76532	0.000307539	0.00316712
TMEM31	0.356077	38.7292	6.76509	0.00011353	0.00209946
XLOC_005572	0.360439	39.1605	6.7635	0.00112691	0.00624052
XLOC_009227	0.228905	24.8617	6.76304	0.00200928	0.00872349
XLOC_l2_004342	0.182106	19.7369	6.75998	6.57e-05	0.00175355
LOC284930	0.140344	15.2067	6.75959	0.000147479	0.00233766
LOC440313	0.330426	35.7935	6.75923	6.57e-05	0.00175355
XLOC_005906	0.291111	31.491	6.75723	0.00112691	0.00624052
XLOC_008585	0.297939	32.1257	6.75257	0.000189715	0.00258435
C8orf67	0.530964	57.1921	6.75106	0.00112691	0.00624052
ONECUT2	0.356458	38.2566	6.74583	0.000387718	0.00350949
CST9	0.43256	46.392	6.74483	0.00200928	0.00872349
BZRAP1	0.346011	37.1008	6.74449	0.000920519	0.00556824
XLOC_014134	0.198276	21.1082	6.73415	6.69e-06	0.00141763
XLOC_012572	0.394779	41.8316	6.7274	0.000147479	0.00233766
LOC100133985	0.253788	26.829	6.72403	2.69e-05	0.00147231
XLOC_003710	0.210682	22.2718	6.72401	0.000920519	0.00556824
XLOC_014029	1.0973	115.951	6.72341	0.0016646	0.0078152
XLOC_011502	0.0905215	9.56432	6.72326	4.93e-05	0.0016654
LOC100652887	0.642228	67.7252	6.72046	0.000307539	0.00316712
XLOC_l2_009442	0.14773	15.5784	6.72044	0.00011353	0.00209946
XLOC_009736	0.338762	35.718	6.72024	0.00137324	0.00698991
XLOC_004050	0.17661	18.6036	6.71888	2.69e-05	0.00147231
OR14I1	0.184878	19.4412	6.7164	0.000485272	0.00391131
XLOC_003603	0.347021	36.318	6.70952	8.69e-05	0.00193397
XLOC_011725	0.14647	15.2927	6.7061	0.000189715	0.00258435
MMP1	0.178514	18.6124	6.70408	9.69e-06	0.00141763
XLOC_007865	0.119901	12.501	6.70405	3e-06	0.00141763
GRM4	0.378909	39.4846	6.7033	0.000189715	0.00258435
XLOC_013581	0.158818	16.5396	6.70241	6.57e-05	0.00175355
RTBDN	0.145367	15.1093	6.6996	3.65e-05	0.00157127
XLOC_l2_000910	0.36569	37.955	6.69753	0.000920519	0.00556824
XLOC_009812	0.138633	14.3807	6.69672	0.000387718	0.00350949
LOC100505498	0.459743	47.5568	6.69268	0.000747678	0.00494802
XLOC_l2_009968	0.197167	20.3925	6.69248	0.000147479	0.00233766
XLOC_007426	0.251633	26.0047	6.6913	0.000242536	0.00286432
XLOC_011111	0.336056	34.6263	6.68702	0.000387718	0.00350949
XLOC_006886	0.894329	92.0488	6.68545	0.0016646	0.0078152
C8orf85	0.226945	23.3099	6.68246	3.65e-05	0.00157127
XLOC_005976	0.262844	26.9582	6.68037	0.000747678	0.00494802
XLOC_l2_002945	0.500308	51.2997	6.67999	0.00137324	0.00698991
XLOC_007421	0.0562749	5.76944	6.67979	1.9e-06	0.00141763
XLOC_l2_009477	0.259845	26.5233	6.67347	0.00011353	0.00209946
FZD9	0.522475	52.9432	6.66294	0.0016646	0.0078152
GPX5	0.453932	45.994	6.66282	0.000920519	0.00556824
XLOC_003560	0.252176	25.5294	6.66158	0.000147479	0.00233766
XLOC_009651	0.329369	33.3422	6.6615	0.0016646	0.0078152
XLOC_013103	0.139594	14.0787	6.65613	6.99e-07	0.00141763
PRO0471	0.136972	13.8066	6.65533	1.94e-05	0.00141763
XLOC_l2_007827	0.272623	27.4554	6.65404	9.69e-06	0.00141763
LOC100507408	0.395471	39.8249	6.65396	0.000387718	0.00350949
XLOC_005586	0.531367	53.5076	6.65389	0.000747678	0.00494802
XLOC_012833	0.0925283	9.29204	6.64996	8.69e-05	0.00193397
LOC100128081	0.24882	24.8995	6.64487	6.57e-05	0.00175355
XLOC_004229	0.367809	36.7154	6.64129	0.000189715	0.00258435
XLOC_012083	0.380059	37.8605	6.63833	0.000485272	0.00391131
ARSI	0.137907	13.7154	6.63595	0.000242536	0.00286432
XLOC_010103	0.211681	20.9489	6.62884	0.000604293	0.00441187
XLOC_009752	0.283344	28.0093	6.62721	0.000485272	0.00391131
PRKY	0.379654	37.4938	6.62582	0.00200928	0.00872349
XLOC_009498	0.304721	30.0774	6.62505	0.000747678	0.00494802
XLOC_012749	1.15492	113.851	6.62321	0.000920519	0.00556824
GRID2IP	0.459154	45.2117	6.62157	0.000307539	0.00316712
LOC439990	0.117428	11.5601	6.62123	4.93e-05	0.0016654
LOC286177	0.235719	23.1792	6.61962	6.57e-05	0.00175355
XLOC_010773	0.481822	47.3318	6.61817	0.0016646	0.0078152
LOC285762	0.326936	32.0975	6.61731	0.000307539	0.00316712
XLOC_001862	0.10234	10.0226	6.61374	1.94e-05	0.00141763
XLOC_l2_007427	0.398701	38.975	6.6111	0.000920519	0.00556824
LOC100507175	0.214782	20.9852	6.61036	0.000387718	0.00350949
XLOC_001166	0.16336	15.8919	6.60409	2.69e-05	0.00147231
XLOC_003364	0.183613	17.8503	6.60314	0.000307539	0.00316712
LOC729870	0.262871	25.5326	6.60184	0.000485272	0.00391131
XLOC_000885	0.209916	20.3658	6.60019	0.00200928	0.00872349
XLOC_007100	0.233133	22.5436	6.59542	0.00011353	0.00209946
GPT	0.206784	19.9732	6.59379	0.000147479	0.00233766
LOC399875	0.394399	38.0345	6.59151	0.000147479	0.00233766
XLOC_001792	0.106302	10.2477	6.59099	2.69e-05	0.00147231
XLOC_003808	0.176637	17.0277	6.59095	1.39e-05	0.00141763
XLOC_009895	0.874875	84.2609	6.58964	0.00200928	0.00872349
SIGLEC6	0.178512	17.1894	6.58936	3.65e-05	0.00157127
LOC144817	0.328205	31.5923	6.58883	0.00112691	0.00624052
XLOC_001666	0.150428	14.424	6.58326	0.000242536	0.00286432
MUC7	0.237803	22.6979	6.57665	0.000387718	0.00350949
AWAT2	0.432398	41.2216	6.5749	0.000747678	0.00494802
XLOC_013552	0.451745	43.0539	6.57449	6.57e-05	0.00175355
KRTAP4-11	0.160825	15.3116	6.57298	6.57e-05	0.00175355
XLOC_l2_014876	0.137057	13.0465	6.57275	2.69e-05	0.00147231
XLOC_014088	0.10401	9.88333	6.57021	0.00137324	0.00698991
LOC100506257	0.40266	38.225	6.56881	0.000387718	0.00350949
XLOC_011216	0.264645	25.0439	6.56426	0.000604293	0.00441187
MRGPRX3	0.414364	39.184	6.56322	0.0016646	0.0078152
XLOC_006122	0.156177	14.7646	6.56282	3e-06	0.00141763
DPYSL3	0.285365	26.9342	6.56049	0.000485272	0.00391131
XLOC_001638	0.203742	19.2269	6.56024	4.93e-05	0.0016654
AFAP1-AS1	0.878212	82.662	6.55651	0.000604293	0.00441187
KLHL38	0.301541	28.3496	6.55483	0.000387718	0.00350949
ZNF578	0.503914	47.2594	6.55128	0.000747678	0.00494802
WFIKKN2	0.24222	22.6963	6.55	0.000387718	0.00350949
XLOC_006325	0.156454	14.6552	6.54952	4.93e-05	0.0016654
XLOC_010286	0.272188	25.4806	6.54865	0.000387718	0.00350949
MUC17	0.690338	64.5732	6.54749	0.000747678	0.00494802
ZNF843	0.232601	21.7515	6.54711	3.65e-05	0.00157127
LOC93444	0.356235	33.2731	6.54538	0.000387718	0.00350949
PRLHR	0.183052	17.0789	6.54382	0.000242536	0.00286432
XLOC_006053	0.314735	29.3316	6.54218	6.57e-05	0.00175355
PLA2G1B	0.412493	38.3717	6.53953	0.00241368	0.00976436
XLOC_012574	0.276116	25.6568	6.53793	0.00241368	0.00976436
AHSG	0.120753	11.2066	6.53615	4.49e-06	0.00141763
GPR78	0.10478	9.71769	6.53518	1.94e-05	0.00141763
XLOC_012177	0.189065	17.5303	6.53483	0.00011353	0.00209946
LOC100131860	0.31493	29.0925	6.52947	0.000242536	0.00286432
TCAM1P	0.169442	15.634	6.52776	0.000147479	0.00233766
LOC285205	0.219197	20.1994	6.52594	0.00241368	0.00976436
XLOC_013965	0.395827	36.3267	6.52002	0.000307539	0.00316712
SNORA62	0.381593	34.9902	6.51877	0.000307539	0.00316712
XLOC_004620	0.280806	25.7291	6.51768	1.94e-05	0.00141763
LOC728054	0.486634	44.5824	6.51749	0.0016646	0.0078152
XLOC_006446	0.171354	15.6786	6.51567	0.000189715	0.00258435
LINC00176	0.192136	17.5023	6.50927	6.69e-06	0.00141763
XLOC_004693	0.487309	44.3674	6.50852	4.93e-05	0.0016654
LOC100506767	0.144601	13.1616	6.50811	0.000307539	0.00316712
XLOC_l2_013650	0.304905	27.7107	6.50594	0.000189715	0.00258435
XLOC_003736	0.217652	19.7765	6.50562	6.57e-05	0.00175355
PROL1	0.696749	63.2678	6.50469	0.000189715	0.00258435
XLOC_001288	0.312929	28.4065	6.50424	4.93e-05	0.0016654
OR1S1	0.507895	46.0835	6.50357	0.000485272	0.00391131
OR51T1	0.120922	10.9375	6.49907	1.39e-05	0.00141763
RTN4RL2	0.308627	27.8843	6.49745	9.69e-06	0.00141763
XLOC_012041	0.216957	19.5957	6.49698	4.93e-05	0.0016654
TTTY16	0.337042	30.3572	6.49297	0.000920519	0.00556824
ASB11	0.391635	35.2556	6.4922	0.0016646	0.0078152
XLOC_006941	0.161339	14.5113	6.49094	2.69e-05	0.00147231
XLOC_002040	0.268063	24.0624	6.48807	0.000604293	0.00441187
XLOC_001971	0.230335	20.6545	6.48658	4.93e-05	0.0016654
ZNF812	0.16154	14.4654	6.48457	0.000147479	0.00233766
XLOC_000669	0.450123	40.2812	6.48365	0.000604293	0.00441187
LOC100505594	0.297152	26.5917	6.48363	0.000307539	0.00316712
XLOC_008653	0.366698	32.7429	6.48044	0.000485272	0.00391131
IL1RAPL2	0.0781199	6.96499	6.47829	9.69e-06	0.00141763
XLOC_005284	0.152842	13.6261	6.47818	8.69e-05	0.00193397
HOXA1	0.266796	23.7737	6.47749	0.000747678	0.00494802
MMP16	1.36607	121.585	6.4758	0.000920519	0.00556824
XLOC_008157	0.148155	13.1827	6.4754	1.94e-05	0.00141763
XLOC_l2_007456	0.192285	17.0709	6.47215	0.000147479	0.00233766
SNORD115-32	0.65796	58.3415	6.47038	0.000747678	0.00494802
IMPG2	0.562683	49.8273	6.46847	0.00137324	0.00698991
XLOC_l2_008316	0.501238	44.3618	6.46768	0.0016646	0.0078152
XLOC_l2_015661	0.450444	39.8213	6.46605	0.00011353	0.00209946
XLOC_011636	0.415653	36.7117	6.46471	0.000485272	0.00391131
XLOC_012166	0.108265	9.55796	6.46407	1.9e-06	0.00141763
TMEM150A	0.252477	22.2569	6.46196	0.000189715	0.00258435
XLOC_002033	0.174396	15.3532	6.46003	8.69e-05	0.00193397
CT45A5	0.359576	31.5204	6.45385	0.00011353	0.00209946
KRT81	0.149542	13.1066	6.4536	6.57e-05	0.00175355
DPCR1	0.360204	31.5399	6.45222	0.00200928	0.00872349
LOC646513	0.322238	28.1629	6.44953	6.57e-05	0.00175355
2023-03-11	0.260864	22.79	6.44896	2.69e-05	0.00147231
XLOC_l2_005465	0.268313	23.3929	6.44601	0.000387718	0.00350949
XLOC_l2_001664	0.0896021	7.81162	6.44595	1.94e-05	0.00141763
CCL24	0.153369	13.3573	6.44447	1.94e-05	0.00141763
FMO6P	0.114894	10.0053	6.44431	0.000485272	0.00391131
ZDHHC22	0.400563	34.8454	6.44279	0.000242536	0.00286432
TDRG1	0.167223	14.545	6.44261	4.93e-05	0.0016654
XLOC_007037	0.359761	31.2854	6.44231	0.000307539	0.00316712
DEFB108B	0.409612	35.5947	6.44126	0.000189715	0.00258435
LOC100506439	0.344174	29.7831	6.43521	0.000920519	0.00556824
PCIF1	0.547213	47.3373	6.43473	0.000189715	0.00258435
XLOC_013173	0.178194	15.3892	6.43233	4.93e-05	0.0016654
XLOC_007546	0.39059	33.7273	6.43212	0.000242536	0.00286432
XLOC_009493	0.514819	44.4149	6.43083	0.000307539	0.00316712
XLOC_000486	0.243288	20.951	6.42821	0.00112691	0.00624052
NUDT16L1	0.369905	31.8112	6.42624	0.000387718	0.00350949
OR8B8	0.0913624	7.83486	6.42216	2.69e-05	0.00147231
KNCN	0.2254	19.302	6.42012	0.000387718	0.00350949
XLOC_001013	0.197557	16.9167	6.42003	2.69e-05	0.00147231
XLOC_013544	0.157246	13.4442	6.41781	3.65e-05	0.00157127
XLOC_009457	0.479594	40.9885	6.41726	0.00112691	0.00624052
LOC100132741	0.335876	28.6159	6.41274	0.000387718	0.00350949
XLOC_012776	0.1288	10.9668	6.41187	3.65e-05	0.00157127
AMIGO3	0.476118	40.538	6.41181	0.00112691	0.00624052
MGC40069	0.29626	25.1829	6.40944	0.000920519	0.00556824
XLOC_006924	0.197738	16.7979	6.40855	8.69e-05	0.00193397
TMEM238	0.308331	26.0857	6.40263	1.94e-05	0.00141763
TAS2R7	0.223382	18.8601	6.39968	0.0016646	0.0078152
FAM182A	0.142166	12.0006	6.39938	4.93e-05	0.0016654
GSTTP2	0.270358	22.8061	6.39841	0.00011353	0.00209946
XLOC_003211	0.310155	26.1483	6.39758	4.93e-05	0.0016654
LOC100128107	0.248607	20.9412	6.39633	2.69e-05	0.00147231
XLOC_012732	0.142554	11.9953	6.39483	4.93e-05	0.0016654
FAM129C	0.591401	49.7598	6.3947	0.00112691	0.00624052
FLJ39534	0.2997	25.2142	6.39457	0.00137324	0.00698991
XLOC_006830	0.295343	24.8426	6.39428	8.69e-05	0.00193397
FOXR2	0.332181	27.8754	6.39088	0.0016646	0.0078152
XLOC_l2_015133	0.137413	11.5279	6.39048	0.000189715	0.00258435
TMCO2	0.24856	20.8416	6.38973	0.000189715	0.00258435
XLOC_012908	0.294833	24.6788	6.38723	0.000747678	0.00494802
OR56A3	0.094157	7.87771	6.38656	1.39e-05	0.00141763
MAGEA12	0.22135	18.5117	6.38596	0.0016646	0.0078152
XLOC_013708	0.212354	17.6734	6.37897	1.94e-05	0.00141763
XLOC_l2_001076	0.314081	26.1041	6.37699	0.000307539	0.00316712
LOC100652782	0.353164	29.3337	6.37608	0.0016646	0.0078152
XLOC_000210	0.0936164	7.76003	6.37316	0.000747678	0.00494802
XLOC_010929	0.118328	9.79902	6.37178	3.65e-05	0.00157127
XLOC_001392	0.408464	33.7169	6.36712	0.0016646	0.0078152
XLOC_005634	0.375023	30.9474	6.36669	0.000920519	0.00556824
KCNV2	0.253269	20.8535	6.36347	8.69e-05	0.00193397
XLOC_l2_006548	0.500245	41.1226	6.36115	0.00200928	0.00872349
XLOC_011706	0.3734	30.5638	6.35496	0.00011353	0.00209946
XLOC_001369	0.139731	11.4295	6.35397	0.000387718	0.00350949
C7orf69	0.169699	13.879	6.35378	6.57e-05	0.00175355
XLOC_001160	0.317874	25.9951	6.35364	0.000189715	0.00258435
SLC34A1	0.230438	18.7492	6.3463	9.69e-06	0.00141763
OR5D16	0.155799	12.6691	6.34548	0.000307539	0.00316712
PRAP1	0.149721	12.1704	6.34495	4.49e-06	0.00141763
XLOC_l2_001089	0.201244	16.349	6.34412	0.000307539	0.00316712
XLOC_006520	0.958302	77.6912	6.34113	0.000189715	0.00258435
XLOC_011286	0.216962	17.569	6.33945	4.93e-05	0.0016654
XLOC_009302	0.150253	12.1563	6.33817	3e-06	0.00141763
XLOC_005299	0.158202	12.796	6.33778	6.57e-05	0.00175355
XLOC_009370	0.19033	15.3571	6.33426	1.94e-05	0.00141763
XLOC_012237	0.133422	10.7504	6.33225	1.94e-05	0.00141763
OR2T4	0.247884	19.9672	6.33182	0.000604293	0.00441187
Q4TAJ0	0.365911	29.4673	6.33148	0.000387718	0.00350949
LOC440570	0.536321	43.1126	6.32887	0.000747678	0.00494802
XLOC_004410	0.390926	31.3785	6.32674	0.00137324	0.00698991
LOC100508633	0.243311	19.5202	6.32602	6.57e-05	0.00175355
GPR88	0.182968	14.6355	6.32174	8.69e-05	0.00193397
LOC100505942	0.280184	22.4021	6.32111	0.000307539	0.00316712
CHRNG	0.126344	10.0899	6.31941	4.49e-06	0.00141763
XLOC_009067	0.483739	38.6048	6.31841	0.00200928	0.00872349
XLOC_003509	0.197671	15.7609	6.31711	0.000387718	0.00350949
XLOC_007155	0.354816	28.288	6.31697	0.000147479	0.00233766
TOX2	0.234594	18.6866	6.31569	0.000307539	0.00316712
LGI4	0.196079	15.575	6.31166	0.000242536	0.00286432
XLOC_003087	0.521658	41.4364	6.31165	0.00137324	0.00698991
XLOC_001866	0.215992	17.1557	6.31157	0.000387718	0.00350949
XLOC_l2_000791	0.199788	15.8569	6.3105	4.93e-05	0.0016654
LOC400958	0.158061	12.5441	6.31038	0.000147479	0.00233766
XLOC_007646	0.297775	23.6232	6.30984	0.000920519	0.00556824
XLOC_l2_000465	0.171066	13.5595	6.30861	2.69e-05	0.00147231
LOC100507091	0.109587	8.67193	6.3062	4.93e-05	0.0016654
XLOC_012600	0.354774	28.0555	6.30524	0.000387718	0.00350949
XLOC_011338	0.315216	24.917	6.30464	0.000242536	0.00286432
XLOC_001448	0.565948	44.5148	6.29747	0.000485272	0.00391131
FGF6	0.168026	13.2117	6.29698	8.69e-05	0.00193397
HEPHL1	0.369007	28.9743	6.29498	0.00112691	0.00624052
XLOC_004414	0.160853	12.6127	6.29299	0.0016646	0.0078152
GPR85	0.312041	24.4488	6.29188	0.00112691	0.00624052
OR6C68	0.0881292	6.89888	6.2906	1.9e-06	0.00141763
MT3	0.250521	19.6102	6.29053	8.69e-05	0.00193397
LOC100128811	0.241295	18.8828	6.29013	0.000242536	0.00286432
DEFA9P	0.309271	24.1922	6.28953	0.000604293	0.00441187
XLOC_007322	0.331602	25.8329	6.28361	0.000920519	0.00556824
MS4A10	0.298515	23.2373	6.2825	0.000147479	0.00233766
LOC729444	0.174516	13.5225	6.27586	0.000747678	0.00494802
FAM75C2	0.318824	24.6877	6.27489	0.00241368	0.00976436
LOC100506765	0.216306	16.7402	6.27409	4.93e-05	0.0016654
KRTAP5-7	0.178068	13.77	6.27296	6.57e-05	0.00175355
XLOC_006008	0.296431	22.8227	6.26662	0.000387718	0.00350949
XLOC_l2_009887	0.16104	12.3751	6.26387	1.94e-05	0.00141763
XLOC_010533	0.389349	29.9127	6.26355	1.94e-05	0.00141763
PPYR1	0.214209	16.4291	6.26109	4.49e-06	0.00141763
XLOC_003080	0.331541	25.3862	6.25871	0.000307539	0.00316712
ANKRD26P3	0.135765	10.3908	6.25806	0.000920519	0.00556824
LOC100507118	0.250192	19.0948	6.254	0.00011353	0.00209946
FLJ43903	0.292433	22.3022	6.25294	0.000387718	0.00350949
XLOC_l2_012518	0.142166	10.8385	6.25244	8.69e-05	0.00193397
XLOC_009790	0.168372	12.8324	6.252	0.000387718	0.00350949
CD7	0.310735	23.666	6.25098	0.000485272	0.00391131
XLOC_l2_005814	0.260487	19.8271	6.25012	0.000147479	0.00233766
AOC4	0.472264	35.937	6.24973	0.000920519	0.00556824
XLOC_l2_008047	0.0954439	7.26271	6.24971	1.39e-05	0.00141763
MKRN9P	0.240665	18.312	6.24962	0.00200928	0.00872349
XLOC_010492	0.249418	18.9703	6.24903	0.0016646	0.0078152
XLOC_006638	0.168414	12.8064	6.24871	4.93e-05	0.0016654
XLOC_000186	0.118927	9.03894	6.24801	0.000147479	0.00233766
FLJ20518	0.305807	23.2092	6.24593	3.65e-05	0.00157127
FLJ16126	0.274601	20.8391	6.24581	0.000387718	0.00350949
OR2J2	0.513448	38.9548	6.24544	8.69e-05	0.00193397
XLOC_012822	0.237259	18.0002	6.24541	1.39e-05	0.00141763
XLOC_003674	0.388033	29.4218	6.24456	3.65e-05	0.00157127
OR11A1	0.301494	22.8356	6.24301	0.000485272	0.00391131
LOC100652883	0.39112	29.6166	6.24265	0.000485272	0.00391131
NAGS	0.646504	48.9466	6.24241	0.00112691	0.00624052
LOC285422	0.388508	29.4006	6.24176	0.000485272	0.00391131
ZCCHC16	0.344662	26.0473	6.23981	0.00241368	0.00976436
TDO2	0.449463	33.9544	6.23925	0.000920519	0.00556824
LOC201477	0.181649	13.7147	6.23843	1.39e-05	0.00141763
GPR61	0.279088	21.0138	6.23448	0.000307539	0.00316712
KRTAP10-4	0.47353	35.4983	6.22815	0.00241368	0.00976436
XLOC_012517	0.246756	18.4647	6.22554	0.000242536	0.00286432
RNF151	0.387374	28.9515	6.22376	0.000747678	0.00494802
C20orf173	0.148361	11.0881	6.22376	4.49e-06	0.00141763
XLOC_002580	0.492391	36.6664	6.21851	0.00137324	0.00698991
XLOC_005942	0.143787	10.7012	6.21769	2.69e-05	0.00147231
XLOC_001124	0.279588	20.8068	6.21761	0.000307539	0.00316712
XLOC_009767	0.366855	27.2696	6.21594	0.00112691	0.00624052
PRR21	0.212399	15.724	6.21005	2.69e-05	0.00147231
ADM	0.185682	13.7203	6.20734	0.000189715	0.00258435
C21orf30	0.514491	37.993	6.20644	0.000604293	0.00441187
LOC100506631	0.31716	23.415	6.20608	6.57e-05	0.00175355
OR2L1P	0.460418	33.9553	6.20455	0.000307539	0.00316712
SMR3A	0.366447	26.9834	6.20232	0.000147479	0.00233766
XLOC_012829	0.558023	41.0648	6.20143	0.000920519	0.00556824
XLOC_012366	0.403282	29.6444	6.19983	0.000387718	0.00350949
LOC100505601	0.430312	31.5805	6.19751	0.00137324	0.00698991
LOC285847	0.363182	26.6311	6.19628	0.000485272	0.00391131
CLNK	0.219563	15.9822	6.18569	0.000189715	0.00258435
XLOC_011433	0.187933	13.678	6.18549	0.00011353	0.00209946
DEFB128	0.213313	15.5234	6.18533	4.93e-05	0.0016654
XLOC_l2_001972	0.151798	11.0277	6.18283	8.69e-05	0.00193397
SSX3	0.182531	13.257	6.18247	3.65e-05	0.00157127
OR10H2	0.125074	9.06806	6.17994	1.9e-06	0.00141763
LRIT1	0.348201	25.2095	6.1779	0.000189715	0.00258435
TBX5	0.244255	17.681	6.17767	0.000485272	0.00391131
XLOC_l2_000417	0.29116	21.0629	6.17675	0.000307539	0.00316712
SHISA7	0.384372	27.8054	6.17672	8.69e-05	0.00193397
LOC100129125	0.610428	44.1427	6.17621	8.69e-05	0.00193397
EIF3IP1	0.323902	23.3465	6.17151	0.00112691	0.00624052
XLOC_002217	0.131809	9.49317	6.17036	8.69e-05	0.00193397
XLOC_006381	0.280802	20.2124	6.16955	0.000307539	0.00316712
XLOC_l2_009886	0.19568	14.0707	6.16806	0.000242536	0.00286432
XLOC_005821	0.156744	11.2596	6.16661	0.00011353	0.00209946
OR4D6	0.227103	16.2644	6.16223	4.49e-06	0.00141763
CTRB2	0.44227	31.6654	6.16184	4.93e-05	0.0016654
XLOC_007753	0.376879	26.9831	6.16181	8.69e-05	0.00193397
GPR39	0.683607	48.9383	6.16165	0.0016646	0.0078152
XLOC_010176	0.20482	14.6482	6.16022	6.69e-06	0.00141763
SIGLEC16	0.134463	9.56902	6.15309	8.69e-05	0.00193397
XLOC_009274	0.305558	21.7048	6.15043	0.00241368	0.00976436
XLOC_003820	0.245876	17.4596	6.14995	1.94e-05	0.00141763
XLOC_004360	0.452376	32.0985	6.14884	0.000747678	0.00494802
LOC399900	0.45355	32.1405	6.14699	1.94e-05	0.00141763
XLOC_009335	0.309068	21.8782	6.14542	0.000485272	0.00391131
XLOC_010130	0.596317	42.1216	6.14234	0.000604293	0.00441187
XLOC_003661	0.220494	15.5662	6.14154	0.000307539	0.00316712
BRSK2	0.355362	25.0517	6.13948	0.00137324	0.00698991
XLOC_005777	0.219272	15.4558	6.13928	0.000747678	0.00494802
XLOC_008043	0.330548	23.2813	6.13817	0.000242536	0.00286432
LOC100507747	0.32647	22.9446	6.13506	0.00011353	0.00209946
LOC100505533	0.497884	34.9908	6.13502	0.00200928	0.00872349
XLOC_009312	0.691813	48.5221	6.13212	0.000920519	0.00556824
MEFV	0.318003	22.2981	6.13174	0.000242536	0.00286432
TSHB	0.125055	8.76686	6.13143	1.39e-05	0.00141763
LOC100506643	0.270689	18.9681	6.1308	0.000387718	0.00350949
XLOC_013285	0.966525	67.7261	6.13076	0.00011353	0.00209946
LOC158960	0.650046	45.5119	6.12956	0.0016646	0.0078152
ARL11	0.583731	40.8377	6.12845	0.000747678	0.00494802
C4orf26	0.213851	14.9593	6.12829	0.000242536	0.00286432
XLOC_000243	0.4349	30.3579	6.12524	0.00112691	0.00624052
LOC100506652	0.288583	20.1102	6.1228	0.000307539	0.00316712
DEFB103A	0.309158	21.541	6.1226	0.000485272	0.00391131
XLOC_000721	0.381753	26.5965	6.12245	0.00011353	0.00209946
KISS1	0.205532	14.3192	6.12244	1.94e-05	0.00141763
OSTCP2	0.407547	28.3635	6.12093	0.000747678	0.00494802
LOC90499	0.188884	13.1097	6.11698	0.00112691	0.00624052
XLOC_l2_008088	0.216736	15.0409	6.1168	0.000387718	0.00350949
CDC20B	0.20275	14.051	6.11483	4.93e-05	0.0016654
XLOC_007532	0.269896	18.6859	6.1134	0.000242536	0.00286432
XLOC_l2_010854	0.219026	15.1328	6.11043	0.000242536	0.00286432
XLOC_005915	0.184377	12.7361	6.11012	0.000485272	0.00391131
LOC400891	0.183042	12.6277	6.10827	1.94e-05	0.00141763
CT45A1	0.349725	24.1241	6.10811	0.000747678	0.00494802
C4orf17	0.402237	27.5713	6.09898	0.00200928	0.00872349
XLOC_002224	0.326624	22.3848	6.09874	0.000485272	0.00391131
XLOC_l2_007096	0.269177	18.442	6.09829	0.00112691	0.00624052
SULT6B1	0.0774759	5.29994	6.09609	1.94e-05	0.00141763
SLC17A7	0.299326	20.4532	6.09447	4.93e-05	0.0016654
XLOC_011676	0.143789	9.79777	6.09043	0.00011353	0.00209946
XLOC_004124	0.34747	23.6513	6.08889	0.000920519	0.00556824
XLOC_002148	0.417003	28.3802	6.08869	0.000604293	0.00441187
LOC441239	0.545433	37.1157	6.08848	0.000747678	0.00494802
XLOC_l2_015177	0.379186	25.782	6.08731	0.000147479	0.00233766
XLOC_008828	0.763159	51.8583	6.08645	0.0016646	0.0078152
LOC100507579	0.316352	21.468	6.08452	0.000387718	0.00350949
XLOC_009933	0.193746	13.1402	6.08368	0.00241368	0.00976436
XLOC_011376	0.243838	16.512	6.08144	0.000147479	0.00233766
ANKRD20A3	0.182689	12.3648	6.08071	0.000604293	0.00441187
KCNH3	0.313669	21.2232	6.08025	1.94e-05	0.00141763
POTED	0.131455	8.88795	6.07921	0.000242536	0.00286432
POU6F2	0.285136	19.2519	6.07721	0.00011353	0.00209946
LOC100506035	0.223453	15.0852	6.07702	6.57e-05	0.00175355
XLOC_012716	0.220424	14.877	6.07665	0.000242536	0.00286432
XLOC_010918	0.550973	37.1598	6.07562	0.00241368	0.00976436
LOC100128219	0.102059	6.88233	6.07542	6.99e-07	0.00141763
MYBL2	0.292619	19.7057	6.07344	1.94e-05	0.00141763
XLOC_013561	0.276096	18.547	6.06987	0.0016646	0.0078152
XLOC_002380	0.245848	16.4571	6.0648	3.65e-05	0.00157127
PPP1R17	0.21815	14.6003	6.06453	0.000485272	0.00391131
XLOC_010834	1.00049	66.8619	6.06241	0.000242536	0.00286432
PIP5K1A	0.282875	18.8957	6.06175	6.57e-05	0.00175355
XLOC_014217	0.431613	28.8084	6.06061	0.00241368	0.00976436
XLOC_011572	0.31198	20.8013	6.05908	0.00137324	0.00698991
FLJ31945	0.416471	27.6883	6.05492	0.000920519	0.00556824
XLOC_l2_013040	0.288465	19.1716	6.05443	0.000242536	0.00286432
ARHGAP4	0.60073	39.9181	6.05418	0.0016646	0.0078152
KRTAP16-1	0.433587	28.7933	6.05327	0.000485272	0.00391131
XLOC_009578	0.195807	12.9917	6.05202	2.69e-05	0.00147231
CXorf48	0.345691	22.8792	6.04841	0.000747678	0.00494802
LOC100509553	0.207336	13.7118	6.0473	0.00011353	0.00209946
MAGEB1	0.0989278	6.52826	6.04418	0.00011353	0.00209946
LOC100506942	0.423013	27.8311	6.03985	0.000920519	0.00556824
PARS2	0.626585	41.2072	6.03924	0.000147479	0.00233766
LOC100130673	0.350094	22.8986	6.03137	0.000387718	0.00350949
XLOC_005442	0.28102	18.3672	6.03031	0.000189715	0.00258435
LINC00308	0.366187	23.9199	6.02949	0.000604293	0.00441187
XLOC_000421	0.124535	8.1325	6.02908	1.39e-05	0.00141763
XLOC_l2_003644	0.619648	40.4562	6.02877	0.000604293	0.00441187
OR2M3	0.687324	44.7979	6.0263	0.0016646	0.0078152
XLOC_004600	0.228038	14.856	6.02563	0.000747678	0.00494802
XLOC_011970	0.371069	24.1365	6.02338	0.000604293	0.00441187
OR5C1	0.312815	20.3461	6.0233	3.65e-05	0.00157127
TCL6	0.225106	14.6041	6.01962	0.000242536	0.00286432
OR2Z1	0.486415	31.5492	6.01927	0.000307539	0.00316712
XLOC_004285	0.249687	16.1739	6.0174	0.00011353	0.00209946
LINC00111	0.234278	15.1637	6.01626	0.000147479	0.00233766
OTP	0.347934	22.5039	6.01522	0.00200928	0.00872349
LOC391764	0.278181	17.9776	6.01403	0.000147479	0.00233766
LOC645485	0.558857	36.046	6.01121	0.00112691	0.00624052
GPR172B	0.591031	38.1165	6.01104	0.000920519	0.00556824
XLOC_005223	1.33596	86.1506	6.01091	0.00200928	0.00872349
LOC442028	0.234663	15.1313	6.0108	0.000485272	0.00391131
XLOC_002211	0.187313	12.0646	6.00919	2.69e-05	0.00147231
MAGEA6	0.297337	19.1506	6.00915	0.000189715	0.00258435
DRD5	1.34912	86.7007	6.00595	0.00200928	0.00872349
LOC100128366	0.113109	7.26698	6.00557	2.69e-05	0.00147231
XLOC_001663	0.387399	24.8707	6.00448	0.000307539	0.00316712
ST8SIA3	0.231177	14.84	6.00435	1.94e-05	0.00141763
XLOC_014408	0.226653	14.5374	6.00314	6.57e-05	0.00175355
XLOC_007218	0.174485	11.1399	5.99649	0.00241368	0.00976436
CCKBR	0.271379	17.3086	5.99504	0.000189715	0.00258435
NTM	0.131795	8.40052	5.99411	0.000307539	0.00316712
XLOC_010435	0.277445	17.6811	5.99386	0.00112691	0.00624052
XLOC_006088	0.215467	13.7255	5.99324	0.000189715	0.00258435
XLOC_013052	0.244013	15.5417	5.99304	3.65e-05	0.00157127
C14orf180	0.342777	21.8124	5.99173	0.000747678	0.00494802
XLOC_011979	0.752634	47.8184	5.98947	0.0016646	0.0078152
IPO13	0.369541	23.426	5.98623	4.93e-05	0.0016654
XLOC_l2_010933	0.265702	16.7765	5.98049	0.00011353	0.00209946
XLOC_005115	0.42928	27.0964	5.98004	0.000189715	0.00258435
LINC00221	0.401303	25.3298	5.98	0.000189715	0.00258435
NEGR1	0.310875	19.6022	5.97853	0.000604293	0.00441187
XLOC_001667	0.213799	13.4797	5.97839	0.000485272	0.00391131
HDGFL1	0.364191	22.9452	5.97735	6.57e-05	0.00175355
XLOC_000367	0.17574	11.0422	5.97344	0.000242536	0.00286432
XLOC_012771	0.211641	13.2682	5.97021	0.000242536	0.00286432
XLOC_006686	0.321082	20.0751	5.96632	0.000747678	0.00494802
ST18	0.381495	23.8358	5.96532	0.000920519	0.00556824
LOC283116	0.183123	11.4118	5.96157	0.000485272	0.00391131
OPALIN	0.296431	18.454	5.9601	0.000189715	0.00258435
CNPY1	0.231741	14.4163	5.95905	0.000242536	0.00286432
LOC642929	0.154197	9.57831	5.95692	0.00011353	0.00209946
ORM1	0.42411	26.2722	5.95296	0.0016646	0.0078152
XLOC_009323	0.247883	15.3334	5.95088	0.00137324	0.00698991
LOC285441	0.180446	11.1516	5.94955	0.000485272	0.00391131
LOC151300	0.229763	14.1687	5.94642	0.000147479	0.00233766
OR52K2	0.290447	17.9054	5.94597	0.000147479	0.00233766
PITX3	0.128838	7.93871	5.94527	6.69e-06	0.00141763
CD300LG	0.489347	30.1066	5.94308	0.000307539	0.00316712
IAPP	0.344898	21.2183	5.94299	0.000485272	0.00391131
XLOC_003809	0.427936	26.31	5.94207	0.000747678	0.00494802
XLOC_l2_003253	0.647831	39.7739	5.94006	0.000604293	0.00441187
XLOC_008013	0.481492	29.5563	5.93981	0.00241368	0.00976436
ANGPT4	0.463005	28.4132	5.93939	0.00112691	0.00624052
XLOC_l2_015673	0.143625	8.79583	5.93644	1.39e-05	0.00141763
XLOC_003383	0.171752	10.504	5.93447	0.00011353	0.00209946
XLOC_010996	0.164481	10.0429	5.93212	2.69e-05	0.00147231
XLOC_008726	0.146827	8.96194	5.93163	2.69e-05	0.00147231
XLOC_l2_005781	0.128773	7.84494	5.92886	6.69e-06	0.00141763
FOXK1	0.49964	30.4343	5.92867	0.000604293	0.00441187
XLOC_011388	0.268607	16.361	5.92862	0.000189715	0.00258435
XLOC_012621	0.224988	13.6952	5.92768	3.65e-05	0.00157127
CYP2A13	0.350877	21.3238	5.92536	0.00241368	0.00976436
XLOC_007957	0.403111	24.4921	5.925	0.000920519	0.00556824
XLOC_006559	0.155601	9.41137	5.91848	1.94e-05	0.00141763
XLOC_003867	0.293345	17.7231	5.91689	8.69e-05	0.00193397
XLOC_002989	0.136036	8.21827	5.91678	9.69e-06	0.00141763
XLOC_l2_014686	0.513913	31.0161	5.91535	0.00137324	0.00698991
XLOC_010979	0.160923	9.69512	5.91282	8.69e-05	0.00193397
XLOC_002044	0.351382	21.147	5.91127	0.000485272	0.00391131
XLOC_l2_015315	0.227119	13.6631	5.91069	0.000485272	0.00391131
XLOC_002959	1.59735	95.9811	5.909	0.000307539	0.00316712
XLOC_003940	0.194996	11.6813	5.90462	0.000387718	0.00350949
XLOC_002735	0.624112	37.3821	5.9044	0.00200928	0.00872349
LOC100506384	0.229202	13.7233	5.90386	0.000604293	0.00441187
LOC149950	0.337485	20.2036	5.90364	0.00011353	0.00209946
XLOC_006774	0.506549	30.3219	5.90351	0.000307539	0.00316712
MFSD2B	0.240265	14.3751	5.9028	0.00011353	0.00209946
MUC2	0.243535	14.5568	5.90142	1.39e-05	0.00141763
XLOC_013498	0.310663	18.566	5.90117	0.00137324	0.00698991
XLOC_l2_015901	0.159807	9.54967	5.90105	0.000147479	0.00233766
SCARNA6	0.356597	21.2901	5.89975	3.65e-05	0.00157127
XLOC_011015	0.534055	31.8789	5.89947	0.000147479	0.00233766
PRKCG	0.302481	18.0485	5.89889	6.57e-05	0.00175355
OR1E1	0.363606	21.6455	5.89555	0.000747678	0.00494802
XLOC_000772	0.331617	19.7277	5.89456	8.69e-05	0.00193397
ABCG5	0.390236	23.2124	5.8944	0.0016646	0.0078152
GSTM5	0.442918	26.3428	5.89423	0.000747678	0.00494802
LOC100129363	0.210657	12.5178	5.89294	0.000147479	0.00233766
TFAP2E	0.240767	14.2952	5.89175	4.49e-06	0.00141763
XLOC_l2_013193	0.112926	6.70221	5.89119	1.2e-06	0.00141763
GABRR3	0.245477	14.5692	5.89119	6.57e-05	0.00175355
FLJ26850	0.258203	15.3065	5.8895	9.69e-06	0.00141763
OR5AS1	0.24181	14.3287	5.88889	0.000307539	0.00316712
LOC100509256	0.24077	14.2604	5.88822	6.69e-06	0.00141763
XLOC_008447	0.161704	9.57509	5.88786	3.65e-05	0.00157127
XLOC_001797	0.217556	12.8795	5.88755	0.000147479	0.00233766
XLOC_002565	0.881209	52.0362	5.88389	0.000387718	0.00350949
XLOC_l2_015011	0.237536	13.9971	5.88084	1.39e-05	0.00141763
PAX4	0.342032	20.1344	5.87939	0.000189715	0.00258435
XLOC_007098	0.181677	10.681	5.87754	8.69e-05	0.00193397
XLOC_004016	0.172795	10.1558	5.8771	4.49e-06	0.00141763
ZFAT-AS1	0.636833	37.3822	5.87529	0.00241368	0.00976436
DCLK3	0.233185	13.6705	5.87345	0.000307539	0.00316712
XLOC_006577	0.347439	20.3636	5.87309	0.00137324	0.00698991
XLOC_008580	0.190667	11.1533	5.87027	0.00011353	0.00209946
LOC100507461	0.504252	29.4936	5.87011	0.000147479	0.00233766
TMEM82	0.150009	8.7687	5.86924	6.57e-05	0.00175355
XLOC_011806	0.277192	16.1819	5.86735	0.00011353	0.00209946
LOC283761	0.237344	13.8343	5.86512	6.57e-05	0.00175355
XLOC_l2_008802	0.230094	13.4015	5.86402	0.00112691	0.00624052
PAX7	0.300129	17.4451	5.8611	0.00241368	0.00976436
XLOC_010360	0.288871	16.7819	5.86033	0.000189715	0.00258435
XLOC_011014	0.380238	22.0866	5.86012	0.00137324	0.00698991
XLOC_008208	0.303558	17.6182	5.85895	0.000242536	0.00286432
OR5A1	0.263326	15.275	5.85818	0.000485272	0.00391131
XLOC_000362	0.330998	19.1938	5.85767	0.000485272	0.00391131
LOC100505903	0.327574	18.9928	5.85749	0.00200928	0.00872349
XLOC_001998	0.282615	16.3718	5.85623	0.000242536	0.00286432
FOXA3	0.417589	24.1658	5.85474	0.000920519	0.00556824
HMX2	0.180695	10.4547	5.85445	8.69e-05	0.00193397
DKFZp686F0839	0.824602	47.647	5.85254	0.000604293	0.00441187
XLOC_000010	0.369914	21.365	5.85192	4.93e-05	0.0016654
XLOC_000494	0.295537	17.0153	5.84734	0.000242536	0.00286432
PRSS21	0.214843	12.3605	5.84631	6.69e-06	0.00141763
XLOC_008385	0.589937	33.9215	5.84549	0.000485272	0.00391131
C18orf12	0.316659	18.1937	5.84437	0.000242536	0.00286432
XLOC_010739	0.319592	18.3434	5.84289	0.000189715	0.00258435
Q8IVV4	0.20928	11.9895	5.8402	2.69e-05	0.00147231
XLOC_l2_009504	0.412176	23.6065	5.83978	0.00200928	0.00872349
ASPDH	0.447995	25.6435	5.83897	0.00200928	0.00872349
LOC440461	0.590483	33.7229	5.83569	0.00112691	0.00624052
DNAH9	0.732765	41.7177	5.83116	0.000747678	0.00494802
LOC100506944	0.464638	26.4358	5.83024	0.00137324	0.00698991
XLOC_011316	0.888367	50.4098	5.8264	0.000604293	0.00441187
XLOC_002697	0.29882	16.9562	5.82639	0.000307539	0.00316712
XLOC_009497	0.147842	8.38058	5.82493	0.000307539	0.00316712
KRTAP12-2	0.387265	21.9015	5.82157	0.00112691	0.00624052
XLOC_009301	0.147144	8.29898	5.81763	0.000189715	0.00258435
ENTPD3-AS1	0.459514	25.8694	5.81499	0.000604293	0.00441187
SNORA2B	0.157889	8.87815	5.81328	6.69e-06	0.00141763
XLOC_l2_013427	0.144451	8.1203	5.81288	9.69e-06	0.00141763
XLOC_013594	0.401628	22.5577	5.81162	0.00241368	0.00976436
C17orf50	0.157446	8.83788	5.81077	0.000189715	0.00258435
XLOC_003318	0.213941	11.9845	5.80781	0.00200928	0.00872349
OR51F1	0.318126	17.8124	5.80714	0.000920519	0.00556824
LOC646762	0.381045	21.333	5.80698	6.57e-05	0.00175355
XLOC_l2_013813	0.32408	18.136	5.80637	0.00200928	0.00872349
OR4C46	0.141092	7.8838	5.80418	1.2e-06	0.00141763
XLOC_010018	0.349945	19.5473	5.8037	0.00200928	0.00872349
XLOC_004199	0.298169	16.6045	5.7993	0.000147479	0.00233766
CPB1	0.326954	18.2018	5.79885	0.00011353	0.00209946
XLOC_001542	0.312983	17.4139	5.79801	0.000604293	0.00441187
XLOC_006271	0.253292	14.0714	5.79582	0.000189715	0.00258435
LOC100652791	0.376105	20.8651	5.79381	0.000189715	0.00258435
ACSM2A	0.378786	21.0122	5.7937	0.000604293	0.00441187
IL19	0.298183	16.5385	5.79349	0.000485272	0.00391131
LOC100129722	0.36123	19.989	5.79015	4.93e-05	0.0016654
LOC440346	0.341822	18.9069	5.78952	0.00137324	0.00698991
LOC100505856	0.512493	28.2664	5.78541	0.000387718	0.00350949
LOC147004	0.285418	15.7224	5.7836	0.000307539	0.00316712
XLOC_004526	0.27165	14.947	5.78196	0.000920519	0.00556824
LOC100134237	0.199081	10.9483	5.78121	4.93e-05	0.0016654
GMNC	0.195627	10.7506	5.78017	0.000307539	0.00316712
XLOC_004621	0.335816	18.4449	5.7794	0.000307539	0.00316712
XLOC_l2_014196	0.1379	7.55475	5.77569	6.57e-05	0.00175355
LOC389033	0.161947	8.86998	5.77534	2.69e-05	0.00147231
TECTB	0.383178	20.9594	5.77344	0.000920519	0.00556824
XLOC_001397	0.553138	30.2527	5.77328	0.0016646	0.0078152
XLOC_l2_008352	0.429553	23.4436	5.77022	0.000604293	0.00441187
XLOC_012176	0.113366	6.1848	5.76967	1.94e-05	0.00141763
XLOC_000841	0.404268	22.0543	5.76961	0.00200928	0.00872349
AQP5	0.3122	17.025	5.76904	0.000485272	0.00391131
XLOC_l2_015209	0.210244	11.4503	5.76717	0.000485272	0.00391131
XLOC_l2_013052	0.110648	6.01998	5.76571	9.69e-06	0.00141763
LOC100652963	0.173192	9.41593	5.76466	6.69e-06	0.00141763
FCAMR	0.347779	18.8985	5.76396	0.00200928	0.00872349
NLRP11	0.620739	33.699	5.76257	0.000147479	0.00233766
LOC283516	0.227483	12.3209	5.7592	0.000189715	0.00258435
XLOC_008102	0.262563	14.2131	5.75842	8.69e-05	0.00193397
XLOC_011645	0.180242	9.75174	5.75766	4.49e-06	0.00141763
LOC729652	0.285719	15.4582	5.75763	0.000307539	0.00316712
XLOC_000357	0.365423	19.7351	5.75506	0.00241368	0.00976436
WFDC9	0.48173	25.9868	5.75341	0.000920519	0.00556824
XLOC_006226	0.290511	15.6661	5.75291	0.000189715	0.00258435
TRIM77P	0.924175	49.7691	5.75094	0.000387718	0.00350949
FMO1	0.304773	16.4122	5.75089	0.00011353	0.00209946
XLOC_006121	0.166155	8.93704	5.7492	2.69e-05	0.00147231
ALPPL2	0.12643	6.78893	5.74677	3.65e-05	0.00157127
XLOC_014300	0.725263	38.939	5.74657	0.00112691	0.00624052
XLOC_004127	0.279607	15.0103	5.74641	1.94e-05	0.00141763
XLOC_001875	0.185634	9.96424	5.74623	9.69e-06	0.00141763
XLOC_010494	0.63591	34.1103	5.74524	0.00241368	0.00976436
LOC100505902	0.313077	16.7919	5.7451	0.000485272	0.00391131
XLOC_000197	0.234872	12.5947	5.7448	0.000604293	0.00441187
XLOC_l2_013252	0.269246	14.4245	5.74345	0.000920519	0.00556824
XLOC_006469	0.270907	14.4988	5.742	0.000307539	0.00316712
XLOC_012563	0.246255	13.1726	5.74124	0.000242536	0.00286432
SRGAP1	0.500443	26.7537	5.74039	0.00241368	0.00976436
REXO1	0.243981	13.0432	5.74039	6.69e-06	0.00141763
XLOC_010199	0.424222	22.6686	5.73973	0.00241368	0.00976436
XLOC_002401	0.934996	49.9258	5.73868	0.00241368	0.00976436
XLOC_004495	0.43821	23.3893	5.73808	0.0016646	0.0078152
XLOC_002181	0.198845	10.6082	5.7374	8.69e-05	0.00193397
XLOC_007408	0.113344	6.04305	5.73649	0.00011353	0.00209946
KCNK15	0.182127	9.70453	5.73564	6.57e-05	0.00175355
OR7D2	0.361245	19.2428	5.7352	0.000920519	0.00556824
XLOC_005132	0.411903	21.924	5.73406	0.000485272	0.00391131
CEACAM8	0.0954636	5.07785	5.73312	2.69e-05	0.00147231
FLJ42969	0.44523	23.6737	5.73259	0.000920519	0.00556824
XLOC_001631	0.4066	21.5744	5.72956	0.000485272	0.00391131
XLOC_010216	0.157447	8.33904	5.72694	6.57e-05	0.00175355
O3FAR1	0.380676	20.151	5.72614	0.000747678	0.00494802
GUCY2D	0.269176	14.2303	5.72428	0.00011353	0.00209946
LOC100130238	0.395233	20.8442	5.7208	0.000307539	0.00316712
KIR3DL1	0.260698	13.7476	5.72066	0.000387718	0.00350949
OR2W3	0.34451	18.1603	5.7201	0.000920519	0.00556824
FIZ1	0.528624	27.8593	5.71977	0.000485272	0.00391131
LOC285627	0.199892	10.5209	5.71789	9.69e-06	0.00141763
FAM138D	0.372579	19.6076	5.71772	0.000307539	0.00316712
XLOC_002358	0.142252	7.45912	5.71249	3.65e-05	0.00157127
XLOC_004272	0.551744	28.8929	5.71057	0.00200928	0.00872349
TMEM174	0.636121	33.2406	5.7075	0.000485272	0.00391131
SPATA3	0.373072	19.4618	5.70505	0.00200928	0.00872349
LCE1D	0.453002	23.6286	5.70487	0.000485272	0.00391131
XLOC_l2_009947	0.436891	22.7514	5.70254	0.000387718	0.00350949
LOC283914	0.269934	14.0394	5.70073	8.69e-05	0.00193397
XLOC_l2_012366	0.270199	14.0518	5.70059	0.000747678	0.00494802
XLOC_008991	0.439722	22.8521	5.69959	0.00137324	0.00698991
XLOC_l2_013151	0.286001	14.8629	5.69955	0.000747678	0.00494802
OR9Q2	0.482419	25.0307	5.69727	0.00241368	0.00976436
TM6SF2	0.409162	21.2081	5.6958	0.000307539	0.00316712
XLOC_l2_004944	0.738447	38.2178	5.69361	0.000307539	0.00316712
SELV	0.531715	27.3986	5.68731	0.00137324	0.00698991
ZNF524	0.325424	16.7516	5.68583	0.000189715	0.00258435
GK2	2.57928	132.68	5.68484	0.00112691	0.00624052
XLOC_007819	0.241457	12.4159	5.68428	0.000604293	0.00441187
XLOC_004678	0.329223	16.9056	5.68229	0.000189715	0.00258435
XLOC_000916	0.118428	6.0794	5.68185	0.00137324	0.00698991
XLOC_011096	0.147035	7.53897	5.68014	0.000387718	0.00350949
LRRC26	0.119459	6.11985	5.67891	4.93e-05	0.0016654
XLOC_009524	0.19084	9.7547	5.67567	4.93e-05	0.0016654
XLOC_006548	0.364755	18.6431	5.67557	0.00200928	0.00872349
XLOC_000332	0.354862	18.0757	5.67065	0.000485272	0.00391131
TCF15	0.42282	21.5247	5.6698	0.000485272	0.00391131
HTR6	0.261305	13.2908	5.66855	0.000387718	0.00350949
XLOC_012768	0.325802	16.5512	5.66679	0.000604293	0.00441187
LOC100130954	0.164977	8.34958	5.66136	0.000189715	0.00258435
NLRP8	0.168964	8.54632	5.66051	0.00011353	0.00209946
LOC100130657	0.1368	6.91863	5.66034	1.94e-05	0.00141763
OR11H12	1.30521	65.9618	5.65928	0.000604293	0.00441187
LOC100507484	0.336331	16.9744	5.65734	6.57e-05	0.00175355
XLOC_009023	0.397689	20.0652	5.65691	0.000189715	0.00258435
LOC100507443	0.470974	23.7443	5.65579	0.00112691	0.00624052
XLOC_007796	0.376932	18.9862	5.65451	0.000604293	0.00441187
LOC100506705	0.324642	16.3475	5.65407	0.00011353	0.00209946
TAAR5	0.172191	8.66924	5.65382	1.94e-05	0.00141763
XLOC_010104	0.198231	9.97906	5.65365	0.00011353	0.00209946
XLOC_008524	0.257051	12.9389	5.65351	6.57e-05	0.00175355
XLOC_001868	0.224651	11.2964	5.65204	6.69e-06	0.00141763
KRTAP4-7	0.480311	24.096	5.64868	0.000387718	0.00350949
XLOC_008260	0.940138	47.0823	5.64617	0.000307539	0.00316712
XLOC_010064	0.235369	11.7866	5.64608	0.000189715	0.00258435
XLOC_l2_004385	0.169366	8.47917	5.64571	1.94e-05	0.00141763
OR5T2	0.53706	26.8823	5.64543	0.00112691	0.00624052
XLOC_000704	0.230248	11.5234	5.64523	4.49e-06	0.00141763
XLOC_006183	0.296902	14.8582	5.64513	1.94e-05	0.00141763
XLOC_002106	0.321689	16.0642	5.64204	0.00011353	0.00209946
XLOC_002317	0.306708	15.2677	5.63747	0.00011353	0.00209946
XLOC_010108	0.170502	8.48451	5.63697	9.69e-06	0.00141763
XLOC_002263	0.332509	16.5378	5.63623	0.00241368	0.00976436
XLOC_l2_006832	0.424612	21.1126	5.63582	0.00137324	0.00698991
XLOC_004377	0.25304	12.5663	5.63405	0.00200928	0.00872349
CABP1	0.250484	12.4356	5.63362	6.57e-05	0.00175355
PSG10P	0.214473	10.6114	5.62867	0.000242536	0.00286432
LOC100507465	0.195642	9.6686	5.62702	8.69e-05	0.00193397
MCHR1	0.333856	16.497	5.62684	0.00137324	0.00698991
MDFI	0.10118	4.99571	5.6257	1.39e-05	0.00141763
EBF2	0.369283	18.2019	5.62322	0.000147479	0.00233766
XLOC_010467	0.399495	19.6792	5.62235	0.00112691	0.00624052
XLOC_005788	0.349356	17.208	5.62224	0.00112691	0.00624052
XLOC_012979	0.43454	21.3991	5.62192	0.000242536	0.00286432
ERVFRD-1	0.405569	19.9555	5.6207	0.000747678	0.00494802
SLITRK1	0.334209	16.4416	5.62046	0.000747678	0.00494802
TRIM63	0.33554	16.4918	5.61912	0.000747678	0.00494802
LINC00322	0.209828	10.3123	5.61901	9.69e-06	0.00141763
XLOC_012368	0.725809	35.6123	5.61664	0.00137324	0.00698991
LOC645553	0.40625	19.9283	5.61631	6.57e-05	0.00175355
XLOC_012408	0.139992	6.86159	5.61512	8.69e-05	0.00193397
NUDT8	0.169946	8.32959	5.6151	4.93e-05	0.0016654
LOC100653206	0.177194	8.67611	5.61365	4.93e-05	0.0016654
XLOC_005876	0.338325	16.5487	5.61217	0.000604293	0.00441187
PAK7	0.415829	20.3064	5.6098	0.00200928	0.00872349
OR4A15	0.336982	16.4402	5.60842	0.000242536	0.00286432
COL6A5	0.497863	24.2847	5.60815	0.00241368	0.00976436
LOC100131432	0.152414	7.43341	5.60796	8.69e-05	0.00193397
XLOC_l2_015206	0.540319	26.3467	5.60767	0.00200928	0.00872349
XLOC_006377	0.252301	12.3011	5.6075	0.000920519	0.00556824
KRTAP20-1	0.505755	24.5812	5.60297	0.000485272	0.00391131
XLOC_007102	0.20153	9.79125	5.60243	1.39e-05	0.00141763
LOC100130456	0.426932	20.6993	5.59943	4.93e-05	0.0016654
LAT	0.251854	12.1959	5.59767	0.00137324	0.00698991
PSKH2	0.235958	11.4182	5.59667	6.57e-05	0.00175355
TNFRSF13C	0.654538	31.6542	5.59578	0.00200928	0.00872349
XLOC_002304	0.323919	15.6047	5.59021	0.00200928	0.00872349
XLOC_011747	0.19621	9.44391	5.58892	4.49e-06	0.00141763
XLOC_014237	0.557585	26.8238	5.58818	0.00137324	0.00698991
LOC127841	0.71897	34.5806	5.58789	0.00241368	0.00976436
XLOC_l2_005503	0.505604	24.3034	5.58701	0.000387718	0.00350949
KRTAP23-1	0.296609	14.2532	5.58658	0.000747678	0.00494802
CLRN1-AS1	0.168013	8.07309	5.58648	0.00011353	0.00209946
XLOC_008938	0.624177	29.9847	5.58613	0.0016646	0.0078152
LOC100130745	0.266593	12.7995	5.58531	0.0016646	0.0078152
LOC100289026	0.321404	15.4178	5.58407	0.000485272	0.00391131
NR2E1	0.21038	10.0803	5.5824	0.00112691	0.00624052
XLOC_006735	0.187117	8.95612	5.58086	0.000147479	0.00233766
XLOC_l2_000186	0.272533	12.9973	5.57564	0.000604293	0.00441187
XLOC_007663	0.165145	7.86974	5.57451	9.69e-06	0.00141763
PRM2	0.322988	15.3812	5.57354	0.000242536	0.00286432
XLOC_005176	0.476293	22.6425	5.57104	8.69e-05	0.00193397
LOC100129596	0.145932	6.93503	5.57053	1.9e-06	0.00141763
PHOSPHO1	0.29364	13.9526	5.57034	8.69e-05	0.00193397
XLOC_003343	0.209084	9.92957	5.56957	2.69e-05	0.00147231
C10orf71	0.391612	18.5936	5.56924	0.00112691	0.00624052
XLOC_l2_015212	0.369495	17.543	5.5692	0.000387718	0.00350949
CDCP2	0.167431	7.94552	5.5685	1.94e-05	0.00141763
FSCB	0.338751	16.0601	5.56712	0.0016646	0.0078152
XLOC_013582	0.384498	18.2199	5.5664	0.000307539	0.00316712
ARHGEF15	0.471396	22.333	5.56609	0.000485272	0.00391131
XLOC_004263	0.562436	26.6456	5.56606	0.000387718	0.00350949
XLOC_001749	0.350023	16.5723	5.56518	0.0016646	0.0078152
FOXA2	7.37802	349.109	5.5643	0.00011353	0.00209946
FLJ22763	0.177801	8.40902	5.5636	0.000485272	0.00391131
BCAR4	0.267468	12.6359	5.56202	0.000189715	0.00258435
XLOC_000340	0.243044	11.4812	5.56191	0.000387718	0.00350949
LOC100131581	0.211896	10.0044	5.56113	0.000387718	0.00350949
ACCN5	0.108385	5.11675	5.56099	0.00011353	0.00209946
GFAP	0.420476	19.8382	5.56012	0.000920519	0.00556824
ACTL8	0.471603	22.2471	5.5599	0.000747678	0.00494802
XLOC_001441	0.216571	10.2098	5.55897	0.000189715	0.00258435
XLOC_004975	0.34983	16.4675	5.55682	0.000147479	0.00233766
XLOC_011521	0.181146	8.52343	5.5562	6.57e-05	0.00175355
RFPL2	0.306057	14.3859	5.55472	0.000242536	0.00286432
LOC100505626	0.245592	11.5379	5.55397	0.000307539	0.00316712
XLOC_l2_012802	0.226337	10.6078	5.55051	3.65e-05	0.00157127
XLOC_007591	0.297544	13.9191	5.54782	0.00137324	0.00698991
XLOC_013216	0.258281	12.0785	5.54735	0.000147479	0.00233766
BMP15	0.210275	9.83305	5.54729	0.000307539	0.00316712
S1PR4	0.434914	20.2985	5.5445	0.000387718	0.00350949
XLOC_004309	0.25568	11.9254	5.54355	0.000604293	0.00441187
XLOC_001219	0.180343	8.40354	5.54218	3.65e-05	0.00157127
XLOC_013310	0.292245	13.5878	5.53899	0.000242536	0.00286432
SLC18A1	0.534001	24.812	5.53805	0.000189715	0.00258435
XLOC_013489	0.276554	12.8497	5.53803	0.000147479	0.00233766
MAFIP	0.188593	8.75802	5.53725	3.65e-05	0.00157127
LOC100507511	0.263172	12.199	5.53461	1.94e-05	0.00141763
LOC100505637	0.321938	14.8989	5.53228	0.000242536	0.00286432
F9	0.211488	9.76351	5.52875	4.93e-05	0.0016654
XLOC_009409	0.2142	9.88592	5.52835	0.00137324	0.00698991
KCNH6	0.290347	13.3889	5.52711	0.00011353	0.00209946
LOC100130542	0.258333	11.8995	5.52552	0.00112691	0.00624052
CDC20	0.274016	12.5771	5.5204	0.000147479	0.00233766
XLOC_006345	0.361417	16.5679	5.51859	0.00137324	0.00698991
LOC100652911	0.144688	6.62769	5.51749	1.39e-05	0.00141763
XLOC_013592	0.173564	7.94221	5.516	1.39e-05	0.00141763
KCNH4	0.144812	6.62331	5.5153	4.93e-05	0.0016654
XLOC_000493	0.272474	12.4475	5.5136	0.0016646	0.0078152
MAPK8IP1	0.535533	24.4607	5.51334	0.0016646	0.0078152
XLOC_004428	0.302807	13.824	5.51264	0.000387718	0.00350949
LOC100287592	0.289882	13.2277	5.51195	0.000147479	0.00233766
XLOC_004638	0.363904	16.6048	5.5119	0.00137324	0.00698991
SCGN	0.192289	8.75554	5.50885	0.000147479	0.00233766
NEK5	0.500125	22.7715	5.5088	0.0016646	0.0078152
LOC284112	0.46176	21.0062	5.50753	0.00112691	0.00624052
LOC100506546	0.382255	17.3849	5.50715	0.000747678	0.00494802
XLOC_l2_006037	0.347501	15.7947	5.50628	0.00011353	0.00209946
XLOC_003243	0.214121	9.7191	5.50432	3.65e-05	0.00157127
LOC100507427	0.11237	5.09821	5.50366	2.69e-05	0.00147231
XLOC_003988	0.232893	10.5576	5.50248	6.57e-05	0.00175355
LOC388276	0.364445	16.4938	5.50008	0.000147479	0.00233766
LOC100130581	0.287556	12.9919	5.49763	0.000485272	0.00391131
FRMD1	0.197148	8.88234	5.49359	0.000147479	0.00233766
SSX1	0.811304	36.4733	5.49045	0.00200928	0.00872349
KRT34	0.572424	25.73	5.49022	0.000604293	0.00441187
XLOC_l2_002855	0.267824	12.0365	5.48999	1.94e-05	0.00141763
FAM181A	0.266401	11.9432	5.48644	0.000147479	0.00233766
LOC645427	0.463931	20.7978	5.48638	0.00200928	0.00872349
XLOC_009840	0.188092	8.43208	5.48637	0.000387718	0.00350949
XLOC_004089	0.352642	15.7994	5.48552	0.00112691	0.00624052
CRP	0.274205	12.2722	5.484	0.000147479	0.00233766
XLOC_l2_007070	0.54975	24.5952	5.48346	0.0016646	0.0078152
XLOC_l2_012082	29.6995	1327.74	5.4824	0.000485272	0.00391131
LOC100128977	0.727494	32.4938	5.48109	6.57e-05	0.00175355
XLOC_007544	0.338817	15.1303	5.48079	6.57e-05	0.00175355
XLOC_008252	0.36496	16.2879	5.47992	0.000242536	0.00286432
ALPP	0.336227	14.9765	5.47712	0.00200928	0.00872349
IQSEC3	0.233806	10.4101	5.47652	0.00011353	0.00209946
XLOC_013675	0.210141	9.35251	5.47593	0.000242536	0.00286432
XLOC_002622	0.21103	9.3762	5.47348	1.94e-05	0.00141763
XLOC_001747	0.195141	8.66943	5.47335	1.9e-06	0.00141763
XLOC_004646	0.332606	14.7694	5.47265	6.57e-05	0.00175355
TOMM20L	0.359883	15.9742	5.47207	0.000189715	0.00258435
XLOC_008440	0.177557	7.87029	5.47006	1.39e-05	0.00141763
GLB1L2	0.775683	34.3646	5.46931	0.00241368	0.00976436
XLOC_001527	0.325015	14.3839	5.46781	0.00137324	0.00698991
XLOC_006308	0.178904	7.91311	5.46699	0.000242536	0.00286432
XLOC_002497	0.21767	9.61622	5.46526	0.000485272	0.00391131
XLOC_005077	0.396776	17.5193	5.46448	0.000920519	0.00556824
Q4KDJ5	0.349351	15.4228	5.46424	0.000604293	0.00441187
JMJD5	0.230333	10.1339	5.45933	4.93e-05	0.0016654
LOC100131048	0.403528	17.7505	5.45904	6.57e-05	0.00175355
XLOC_001430	0.140071	6.1553	5.4576	1.39e-05	0.00141763
XLOC_l2_010118	0.50461	22.1583	5.45653	3.65e-05	0.00157127
XLOC_009305	0.451393	19.8048	5.45532	0.000387718	0.00350949
LOC100130155	0.310462	13.606	5.45368	0.000485272	0.00391131
XLOC_010893	0.224905	9.84356	5.45179	0.00112691	0.00624052
LOC100130741	0.279402	12.2001	5.44841	1.94e-05	0.00141763
LOC100128529	0.27657	12.0704	5.44769	0.000189715	0.00258435
XLOC_012689	0.221086	9.6357	5.44571	0.00241368	0.00976436
XLOC_005730	0.183356	7.97247	5.44231	6.57e-05	0.00175355
GTF2H4	0.325172	14.138	5.44223	1.39e-05	0.00141763
PPP1R1A	0.429738	18.6524	5.43976	0.00200928	0.00872349
XLOC_008555	0.291593	12.6299	5.43675	0.000307539	0.00316712
RANGAP1	0.410342	17.7595	5.43562	0.000242536	0.00286432
XLOC_l2_001911	0.324247	14.0322	5.43551	0.000307539	0.00316712
XLOC_010685	0.171229	7.40163	5.43384	6.57e-05	0.00175355
LOC400752	0.216631	9.35597	5.43257	2.69e-05	0.00147231
XLOC_011728	0.176563	7.62484	5.43245	0.000920519	0.00556824
C1orf98	0.144632	6.24107	5.43134	8.69e-05	0.00193397
LRSAM1	0.351833	15.1723	5.43041	0.000920519	0.00556824
XLOC_013566	0.474156	20.4401	5.4299	0.000307539	0.00316712
XLOC_000167	0.252134	10.8642	5.42924	2.69e-05	0.00147231
LOC100131150	0.344076	14.78	5.42477	0.000242536	0.00286432
LGALS17A	0.681675	29.2569	5.42355	0.0016646	0.0078152
XLOC_009021	0.244204	10.4663	5.42152	3e-06	0.00141763
VSTM5	0.183297	7.84723	5.41993	3.65e-05	0.00157127
XLOC_010652	0.206177	8.82097	5.41898	2.69e-05	0.00147231
PDE6C	0.507068	21.6843	5.41832	1.94e-05	0.00141763
PAPL	0.170527	7.28571	5.417	3.65e-05	0.00157127
KIR2DS4	0.300706	12.8325	5.4153	0.000189715	0.00258435
XLOC_011849	0.284028	12.1129	5.41436	3e-06	0.00141763
XLOC_012830	0.546364	23.299	5.41426	0.000920519	0.00556824
CEACAM20	0.638001	27.1921	5.41348	0.0016646	0.0078152
XLOC_011654	0.242173	10.3113	5.41205	0.000747678	0.00494802
XLOC_l2_000604	0.344408	14.6401	5.40966	0.000307539	0.00316712
XLOC_005917	0.310901	13.2145	5.40952	0.000387718	0.00350949
LOC100509247	0.49106	20.8434	5.40754	0.0016646	0.0078152
C6orf183	0.656092	27.8241	5.40629	0.00137324	0.00698991
XLOC_006971	0.316136	13.3476	5.39989	0.00011353	0.00209946
LOC100505949	0.174295	7.3571	5.39953	1.39e-05	0.00141763
XLOC_l2_014931	0.339481	14.3249	5.39905	6.57e-05	0.00175355
CEACAM18	0.404596	17.0132	5.39403	0.00112691	0.00624052
PRAMEF15	0.456935	19.2055	5.39338	0.000604293	0.00441187
LIME1	0.677859	28.4764	5.39264	0.0016646	0.0078152
HTR3A	0.298293	12.5263	5.39209	2.69e-05	0.00147231
XLOC_007842	0.173581	7.28449	5.39115	0.000747678	0.00494802
XLOC_l2_005415	0.269558	11.3034	5.39002	4.93e-05	0.0016654
OR4F6	0.210313	8.79571	5.38619	0.000307539	0.00316712
XLOC_002303	0.783018	32.7332	5.38557	0.000147479	0.00233766
XLOC_006736	0.234304	9.78724	5.38445	3.65e-05	0.00157127
PSG6	0.130119	5.43099	5.38331	1.94e-05	0.00141763
CDHR5	0.376415	15.7063	5.38287	0.000485272	0.00391131
CRYGD	0.280791	11.7049	5.38147	3.65e-05	0.00157127
RUNDC3A	0.324186	13.5083	5.38088	0.00011353	0.00209946
RNASE2	0.173659	7.23562	5.38079	3.65e-05	0.00157127
TUBA3D	0.287021	11.956	5.38044	3.65e-05	0.00157127
XLOC_011826	0.465696	19.3822	5.3792	0.000604293	0.00441187
SLC8A2	0.308231	12.8267	5.37899	0.000485272	0.00391131
XLOC_l2_013000	0.226521	9.42454	5.37871	8.69e-05	0.00193397
XLOC_l2_000552	0.315444	13.11	5.37713	0.000747678	0.00494802
OSCAR	0.533643	22.1758	5.37697	0.000147479	0.00233766
XLOC_009356	0.139712	5.80525	5.37683	3.65e-05	0.00157127
PDE6G	0.326602	13.56	5.37568	2.69e-05	0.00147231
NEUROG3	0.198546	8.23714	5.37459	1.94e-05	0.00141763
XLOC_001953	0.80855	33.5436	5.37456	0.0016646	0.0078152
LOC100128160	0.242641	10.0625	5.37402	0.000242536	0.00286432
LOC100506307	0.415111	17.1821	5.37126	0.000920519	0.00556824
XLOC_l2_001667	0.152672	6.31819	5.371	0.000242536	0.00286432
LOC440337	0.213008	8.81295	5.37064	1.94e-05	0.00141763
XLOC_008351	0.546507	22.5476	5.36659	1.94e-05	0.00141763
LOC100286979	0.401477	16.5594	5.36619	0.000147479	0.00233766
C14orf166B	0.504105	20.7899	5.36602	0.000747678	0.00494802
OTUD6A	0.505565	20.7966	5.36231	0.000307539	0.00316712
XLOC_002709	0.426683	17.5323	5.36071	0.0016646	0.0078152
TNR	0.411198	16.8653	5.35808	3.65e-05	0.00157127
XLOC_l2_007419	0.221618	9.07544	5.35582	0.000604293	0.00441187
LOC100288346	0.452133	18.5109	5.35548	0.000485272	0.00391131
LOC100129111	0.524256	21.4546	5.35487	0.0016646	0.0078152
XLOC_006333	0.278766	11.3877	5.35228	0.000747678	0.00494802
XLOC_014018	0.333038	13.603	5.3521	0.000485272	0.00391131
LYZL2	0.367869	15.0253	5.35206	0.000387718	0.00350949
XLOC_011102	0.181552	7.41133	5.35128	1.94e-05	0.00141763
LOC440700	0.249751	10.1924	5.35087	0.000920519	0.00556824
XLOC_003134	0.223464	9.11546	5.3502	8.69e-05	0.00193397
ACHE	0.618414	25.2235	5.35005	0.0016646	0.0078152
POU2F3	0.372171	15.1626	5.34841	0.0016646	0.0078152
C3orf43	0.214999	8.7317	5.34386	0.000242536	0.00286432
XLOC_001065	0.302573	12.2758	5.3424	0.0016646	0.0078152
LOC100506650	0.177823	7.20702	5.34089	2.69e-05	0.00147231
BTG4	0.975776	39.5223	5.33997	0.00137324	0.00698991
CRYGN	0.465156	18.8105	5.33768	0.0016646	0.0078152
LOC100507284	0.665382	26.8909	5.33679	0.00137324	0.00698991
XLOC_004691	0.552905	22.3247	5.33547	0.00011353	0.00209946
DMRTB1	0.261939	10.5374	5.33014	0.00112691	0.00624052
LOC100129393	0.312296	12.5623	5.33005	8.69e-05	0.00193397
LOC100130540	0.277731	11.1618	5.32873	0.000242536	0.00286432
SORBS3	0.207917	8.34562	5.32694	4.49e-06	0.00141763
XLOC_010570	0.140836	5.65137	5.32652	1.94e-05	0.00141763
LRRC66	0.442126	17.7235	5.32506	0.00200928	0.00872349
SRD5A3	0.206001	8.25455	5.32447	2.69e-05	0.00147231
XLOC_007824	0.199672	7.99672	5.32371	2.69e-05	0.00147231
Q442D3	0.258678	10.3553	5.32306	8.69e-05	0.00193397
XLOC_l2_003295	0.43101	17.2477	5.32254	0.000604293	0.00441187
XLOC_011468	0.349657	13.9714	5.32039	3.65e-05	0.00157127
LINC00442	0.241598	9.64357	5.31889	0.000604293	0.00441187
LOC415056	0.294256	11.7442	5.31873	0.00112691	0.00624052
XLOC_003147	0.192223	7.67132	5.31862	6.69e-06	0.00141763
LOC100653001	0.319745	12.7398	5.31628	8.69e-05	0.00193397
OR10C1	0.582657	23.2082	5.31584	0.000387718	0.00350949
C10orf25	0.645749	25.7143	5.31545	0.000747678	0.00494802
RNASE13	0.511822	20.3667	5.31443	0.00112691	0.00624052
XLOC_013785	0.182433	7.24017	5.31059	1.39e-05	0.00141763
KRTAP10-10	0.359765	14.2754	5.31034	0.00011353	0.00209946
XLOC_002081	0.483262	19.1579	5.30899	0.00241368	0.00976436
UBTFL1	0.580752	22.9678	5.30555	0.000242536	0.00286432
XLOC_007207	0.285437	11.2854	5.30514	1.9e-06	0.00141763
GDF10	0.17119	6.76561	5.30455	4.93e-05	0.0016654
OR1L3	0.399628	15.7778	5.30309	0.000242536	0.00286432
GIPR	0.220014	8.68639	5.30309	1.94e-05	0.00141763
XLOC_003842	0.193802	7.64929	5.30267	6.69e-06	0.00141763
P2RX3	0.379568	14.9612	5.30072	0.0016646	0.0078152
XLOC_l2_008214	0.403083	15.8704	5.29911	0.000920519	0.00556824
INS-IGF2	0.403976	15.8878	5.2975	0.00112691	0.00624052
VSIG8	0.481523	18.9345	5.29727	0.00241368	0.00976436
LOC100130654	0.192591	7.57068	5.29681	1.39e-05	0.00141763
SLC22A14	0.200757	7.89099	5.29668	4.49e-06	0.00141763
XLOC_011289	0.224436	8.8204	5.29647	0.000189715	0.00258435
LOC100652975	0.332893	13.0519	5.29305	0.000147479	0.00233766
KRTAP9-9	0.476005	18.6555	5.29248	0.00241368	0.00976436
WTH3DI	0.343892	13.4775	5.29245	0.0016646	0.0078152
MFAP5	0.17369	6.78286	5.28731	0.00011353	0.00209946
XLOC_013467	0.403991	15.7759	5.28726	8.69e-05	0.00193397
XLOC_012863	0.441047	17.2221	5.28719	0.000307539	0.00316712
ZNF664-FAM101A	0.26604	10.3768	5.28557	9.69e-06	0.00141763
XLOC_005478	0.302492	11.7767	5.2829	6.57e-05	0.00175355
XLOC_l2_010926	0.354554	13.7945	5.28194	0.000485272	0.00391131
XLOC_005039	0.331821	12.8966	5.28044	6.57e-05	0.00175355
XLOC_003919	0.286312	11.1195	5.27937	1.9e-06	0.00141763
SCARNA10	0.28051	10.893	5.27921	0.00011353	0.00209946
TMEM30C	0.236878	9.18258	5.27668	6.57e-05	0.00175355
XLOC_009372	0.126647	4.90384	5.27503	1.39e-05	0.00141763
LOC646938	0.457595	17.71	5.27435	0.00200928	0.00872349
PROKR2	0.325643	12.5988	5.27385	0.000747678	0.00494802
XLOC_005461	0.251002	9.70319	5.27269	0.000747678	0.00494802
PLG	0.350725	13.5563	5.27248	0.000242536	0.00286432
TMEM105	0.31397	12.1256	5.27129	0.000147479	0.00233766
XLOC_l2_004843	0.870623	33.619	5.27109	0.00137324	0.00698991
SPINK14	0.362001	13.9736	5.27056	0.0016646	0.0078152
FASLG	0.178628	6.89465	5.27045	4.93e-05	0.0016654
XLOC_l2_000522	0.296786	11.4339	5.26774	0.000242536	0.00286432
XLOC_004259	0.215578	8.30029	5.26688	8.69e-05	0.00193397
C1orf94	0.32148	12.3673	5.26565	1.94e-05	0.00141763
PSG1	0.189614	7.29211	5.2652	1.94e-05	0.00141763
XLOC_003347	0.166688	6.38718	5.25996	9.69e-06	0.00141763
LOC340239	0.536314	20.5276	5.25835	0.00112691	0.00624052
GOT1L1	0.339845	12.9839	5.25571	0.000604293	0.00441187
EIF5AL1	0.205923	7.85301	5.25307	1.39e-05	0.00141763
ERVW-1	0.370942	14.1397	5.25242	0.000604293	0.00441187
ACTR3BP2	0.248764	9.48003	5.25204	0.000242536	0.00286432
SCG3	0.255535	9.71897	5.24921	0.00011353	0.00209946
XLOC_l2_007693	0.211537	8.02873	5.24619	0.0016646	0.0078152
XLOC_006083	0.261761	9.90401	5.24169	6.57e-05	0.00175355
XLOC_l2_007731	0.20334	7.68981	5.24098	0.000747678	0.00494802
ALDOAP2	0.179413	6.78441	5.24087	0.000242536	0.00286432
PLP1	0.257361	9.72546	5.2399	0.000189715	0.00258435
KIRREL3	0.183492	6.92446	5.23791	6.57e-05	0.00175355
PANX3	0.160642	6.0578	5.23687	8.69e-05	0.00193397
OR8D1	0.769157	28.9794	5.23561	0.000242536	0.00286432
XLOC_004073	0.223705	8.40742	5.23199	0.000920519	0.00556824
XLOC_011532	0.328597	12.3397	5.23085	0.000242536	0.00286432
XLOC_013939	0.432439	16.2341	5.23039	0.00112691	0.00624052
XLOC_000866	0.341143	12.8068	5.23039	0.00112691	0.00624052
LOC284661	0.454338	17.0551	5.2303	0.000307539	0.00316712
XLOC_002685	0.408644	15.3328	5.22964	0.000307539	0.00316712
XLOC_009464	0.200915	7.53596	5.22913	0.00011353	0.00209946
XLOC_007370	0.195414	7.32788	5.22879	9.69e-06	0.00141763
LOC100128164	0.30228	11.3231	5.22724	0.000242536	0.00286432
XLOC_002987	0.773254	28.9571	5.22683	0.000189715	0.00258435
LOC728684	1.34146	50.2175	5.22632	0.0016646	0.0078152
XLOC_010879	0.291929	10.9194	5.22513	0.000242536	0.00286432
LOC100506470	0.378062	14.1234	5.22332	0.000307539	0.00316712
LOC282980	0.354101	13.2276	5.22325	0.000920519	0.00556824
IL28A	0.195534	7.30395	5.22318	0.000147479	0.00233766
LINC00184	0.194443	7.26104	5.22276	3e-06	0.00141763
XLOC_010204	0.305628	11.4088	5.22222	0.000387718	0.00350949
XLOC_l2_006789	0.271378	10.1213	5.22095	4.93e-05	0.0016654
FLJ35424	0.195157	7.26929	5.2191	4.49e-06	0.00141763
LOC100131650	0.25252	9.4028	5.21862	3.65e-05	0.00157127
XLOC_013786	0.347198	12.9272	5.21851	8.69e-05	0.00193397
TRDN	0.376401	14.0027	5.21729	0.00200928	0.00872349
KRTAP2-1	0.26444	9.83751	5.21728	3.65e-05	0.00157127
LOC729020	0.877254	32.6072	5.21605	0.00137324	0.00698991
XLOC_004814	0.16819	6.2458	5.21472	9.69e-06	0.00141763
XLOC_006291	0.203698	7.56011	5.2139	0.000485272	0.00391131
LPPR2	0.31323	11.6242	5.21377	0.000147479	0.00233766
XLOC_005344	0.611639	22.6829	5.21278	0.000189715	0.00258435
PABPC1L2A	0.535276	19.7853	5.208	0.000387718	0.00350949
SP7	0.509979	18.811	5.205	0.00137324	0.00698991
XLOC_001870	1.55328	57.1903	5.20238	0.00112691	0.00624052
XLOC_002924	0.630928	23.2294	5.20233	0.00112691	0.00624052
XLOC_014275	0.211273	7.77859	5.20233	3e-06	0.00141763
XLOC_004427	0.434739	15.9956	5.20138	0.000485272	0.00391131
LOC442122	1.38249	50.8441	5.20073	0.000485272	0.00391131
XLOC_005776	0.266159	9.77837	5.19923	4.93e-05	0.0016654
XLOC_005051	0.261228	9.59058	5.19824	1.94e-05	0.00141763
NOG	0.155857	5.71926	5.19753	2.69e-05	0.00147231
XLOC_l2_011954	0.368086	13.4951	5.19625	0.000147479	0.00233766
LOC284072	0.179085	6.56264	5.19556	3e-06	0.00141763
RNMTL1	0.245147	8.97873	5.19479	3.65e-05	0.00157127
OTOP1	0.447693	16.3953	5.19463	0.000387718	0.00350949
LTK	0.413377	15.1349	5.19428	0.0016646	0.0078152
XLOC_013617	0.372131	13.62	5.19378	0.00112691	0.00624052
SNORA54	0.139644	5.10438	5.19191	4.93e-05	0.0016654
PABPN1L	0.385348	14.0827	5.19162	0.000604293	0.00441187
FLJ34747	0.311955	11.3996	5.19149	0.00200928	0.00872349
XLOC_005790	0.235975	8.62235	5.19138	6.57e-05	0.00175355
XLOC_004572	0.482941	17.645	5.19127	0.000485272	0.00391131
XLOC_001974	0.151475	5.53354	5.19105	1.39e-05	0.00141763
C6orf103	0.483493	17.658	5.19068	0.00137324	0.00698991
UNC13A	0.440083	16.0588	5.18945	0.00200928	0.00872349
XLOC_005167	0.21256	7.75467	5.18913	9.69e-06	0.00141763
DUX4L9	0.403562	14.7172	5.18857	3.65e-05	0.00157127
XLOC_008418	0.794246	28.9626	5.18846	0.00137324	0.00698991
XLOC_004925	0.393244	14.3394	5.18841	0.0016646	0.0078152
SPSB4	0.175589	6.39467	5.18659	9.69e-06	0.00141763
KCND2	0.218686	7.95561	5.18504	6.57e-05	0.00175355
LOC100132396	0.432601	15.7249	5.18387	0.000747678	0.00494802
XLOC_000850	0.337162	12.2555	5.18385	0.000604293	0.00441187
XLOC_003175	0.251675	9.14355	5.18312	6.57e-05	0.00175355
XLOC_002678	0.862422	31.2925	5.18128	0.00241368	0.00976436
XLOC_001414	0.139332	5.05538	5.18122	2.69e-05	0.00147231
XLOC_l2_000324	0.360688	13.0816	5.18065	6.57e-05	0.00175355
C4orf40	0.277608	10.061	5.17958	1.94e-05	0.00141763
SLC18A3	0.13401	4.85366	5.17866	6.57e-05	0.00175355
XLOC_008259	0.682635	24.7062	5.17761	0.00112691	0.00624052
LRP2	0.259013	9.37218	5.17729	0.000242536	0.00286432
XLOC_010240	0.102341	3.69775	5.17519	4.49e-06	0.00141763
XLOC_011758	0.46557	16.8201	5.17504	0.000747678	0.00494802
XLOC_011150	0.447062	16.1358	5.17365	0.000147479	0.00233766
XLOC_011937	1.50396	54.2739	5.17342	0.00137324	0.00698991
LOC100653338	0.297539	10.7322	5.17273	0.000307539	0.00316712
XLOC_003771	0.460281	16.5584	5.1689	0.000747678	0.00494802
SPRNP1	0.478701	17.1973	5.16692	0.000147479	0.00233766
XLOC_l2_003606	0.224558	8.06414	5.16636	0.000242536	0.00286432
XLOC_l2_007770	0.447523	16.0599	5.16536	0.000307539	0.00316712
ARGFX	0.221708	7.94533	5.16337	0.000189715	0.00258435
CCDC64B	0.447961	16.038	5.16198	0.000747678	0.00494802
XLOC_004878	0.242923	8.68326	5.15966	1.94e-05	0.00141763
XLOC_010860	0.248417	8.8752	5.15895	0.000147479	0.00233766
XLOC_009374	0.305985	10.9161	5.15685	3.65e-05	0.00157127
TM4SF20	0.332417	11.8532	5.15613	0.00241368	0.00976436
XLOC_010445	0.253827	9.03747	5.154	0.00011353	0.00209946
XLOC_007967	0.362982	12.9154	5.15305	4.93e-05	0.0016654
XLOC_l2_007119	0.524305	18.6555	5.15305	0.000242536	0.00286432
XLOC_012607	0.306936	10.9123	5.15187	0.00241368	0.00976436
XLOC_002672	0.342358	12.1673	5.15136	0.000604293	0.00441187
FLJ46120	0.211064	7.4885	5.14892	0.000147479	0.00233766
XLOC_002366	0.490359	17.3826	5.14766	0.000242536	0.00286432
GPR19	0.532522	18.8711	5.14719	0.000604293	0.00441187
MAGI2-IT1	0.26487	9.36417	5.14379	0.000189715	0.00258435
XLOC_002102	0.183474	6.48603	5.14369	6.69e-06	0.00141763
SYT6	0.283902	10.0338	5.14333	0.000242536	0.00286432
C1orf110	0.346627	12.2407	5.14216	0.000242536	0.00286432
OR1L6	0.436663	15.4151	5.14168	0.000307539	0.00316712
LOC400684	0.305477	10.7798	5.14112	9.69e-06	0.00141763
XLOC_010936	0.377486	13.3172	5.14072	0.00011353	0.00209946
HCRTR1	0.212409	7.49219	5.14047	8.69e-05	0.00193397
CDK15	0.481538	16.9723	5.13939	0.000387718	0.00350949
OCM2	0.262013	9.23287	5.13907	0.000189715	0.00258435
XLOC_004022	1.23263	43.4099	5.13821	0.000242536	0.00286432
XLOC_008835	0.588512	20.7156	5.1375	0.0016646	0.0078152
XLOC_002237	0.250684	8.80378	5.13418	8.69e-05	0.00193397
WASH5P	0.571708	20.077	5.13412	0.00241368	0.00976436
GPR35	0.425239	14.926	5.13341	6.57e-05	0.00175355
XLOC_010699	0.182708	6.41244	5.13326	0.000485272	0.00391131
XLOC_011476	0.213342	7.47765	5.13135	6.57e-05	0.00175355
XLOC_008560	0.163739	5.72842	5.12866	4.93e-05	0.0016654
LOC100130920	0.308254	10.7773	5.12773	0.00011353	0.00209946
GCK	0.383027	13.381	5.12659	0.000147479	0.00233766
LOC100130345	0.379052	13.2297	5.12523	3.65e-05	0.00157127
XLOC_005794	0.720856	25.1522	5.12483	0.0016646	0.0078152
VAX2	0.353845	12.3441	5.12456	0.000307539	0.00316712
C4orf49	0.208913	7.28276	5.12351	0.000604293	0.00441187
CDH12	0.22599	7.87621	5.12317	0.000485272	0.00391131
LOC340090	0.392697	13.6843	5.12296	0.00137324	0.00698991
XLOC_007540	0.490859	17.0916	5.12184	2.69e-05	0.00147231
XLOC_009304	0.174076	6.05825	5.12112	2.69e-05	0.00147231
KRTAP21-1	0.356157	12.3921	5.12076	0.000307539	0.00316712
XLOC_012848	0.394097	13.7012	5.1196	0.00241368	0.00976436
RIMS1	0.236404	8.19975	5.11626	0.00137324	0.00698991
XLOC_007240	0.250446	8.67564	5.1144	1.39e-05	0.00141763
XLOC_013832	0.760323	26.3146	5.11311	0.000747678	0.00494802
LOC100505490	0.38197	13.2128	5.11233	0.00011353	0.00209946
XLOC_005105	0.496414	17.1472	5.11029	0.000747678	0.00494802
C17orf6	1.52717	52.6266	5.10686	0.00200928	0.00872349
DSCR10	0.378531	13.0373	5.10609	0.000387718	0.00350949
XKR3	0.223182	7.68556	5.10586	2.69e-05	0.00147231
XLOC_007283	0.238757	8.21737	5.10506	0.000242536	0.00286432
OR8U1	0.350417	12.0548	5.10439	0.000307539	0.00316712
IL17RE	0.166491	5.72484	5.10372	9.69e-06	0.00141763
XLOC_002612	0.189523	6.51511	5.10335	0.000242536	0.00286432
CTNNA2	0.315459	10.8337	5.10194	0.00241368	0.00976436
XLOC_005613	0.364732	12.5208	5.10135	0.000387718	0.00350949
XLOC_009911	0.315264	10.8137	5.10016	0.000747678	0.00494802
LOC100134229	0.32464	11.1343	5.10003	0.000747678	0.00494802
ZSCAN12P1	0.153232	5.25459	5.09978	3.65e-05	0.00157127
LOC338797	0.206982	7.09587	5.0994	4.93e-05	0.0016654
SNORD1B	0.41802	14.3164	5.09795	0.0016646	0.0078152
XLOC_000230	0.433942	14.8477	5.09659	0.000920519	0.00556824
HMP19	0.443912	15.1854	5.09627	0.000307539	0.00316712
OPN1MW	0.185475	6.34316	5.0959	0.00011353	0.00209946
KRTAP10-2	0.616771	21.0806	5.09504	0.000604293	0.00441187
XLOC_001066	0.23067	7.88231	5.09472	0.000189715	0.00258435
LOC84931	0.270087	9.22795	5.09452	1.39e-05	0.00141763
LOC100130372	0.245051	8.37179	5.09438	0.0016646	0.0078152
XLOC_013038	0.285888	9.76683	5.09437	0.000485272	0.00391131
OR51G2	0.716248	24.4152	5.09118	0.000920519	0.00556824
KCNE1	0.440535	15.0101	5.09053	0.00011353	0.00209946
PAGE2	0.495851	16.8788	5.08916	0.0016646	0.0078152
XLOC_009807	0.240392	8.1638	5.08578	8.69e-05	0.00193397
XLOC_000550	0.408069	13.8579	5.08575	0.000604293	0.00441187
XLOC_003052	0.298689	10.1367	5.08481	0.00112691	0.00624052
LOC283270	0.302477	10.2486	5.08246	0.000485272	0.00391131
B3GNT8	0.36207	12.2665	5.08231	0.000147479	0.00233766
XLOC_003588	0.287468	9.73815	5.08217	6.57e-05	0.00175355
LOC150622	0.1456	4.92616	5.08038	3.65e-05	0.00157127
UNQ9370	0.172563	5.82585	5.07727	8.69e-05	0.00193397
GJD4	0.134138	4.52542	5.07626	1.39e-05	0.00141763
XLOC_l2_013863	0.384192	12.9481	5.07477	4.93e-05	0.0016654
XLOC_010430	0.460246	15.4995	5.07367	0.000485272	0.00391131
GFI1	0.163019	5.48024	5.07112	0.000242536	0.00286432
LOC285740	0.136304	4.5785	5.06998	9.69e-06	0.00141763
SV2B	0.475169	15.9394	5.06801	0.00112691	0.00624052
XLOC_010418	0.259801	8.71287	5.06767	0.000147479	0.00233766
LOC100505515	0.633055	21.2299	5.06762	0.00112691	0.00624052
LOC100130849	0.351221	11.7696	5.06654	0.000920519	0.00556824
XLOC_013589	0.322099	10.7907	5.06615	0.00011353	0.00209946
C22orf42	0.510703	17.1008	5.06543	0.000307539	0.00316712
CD244	0.226389	7.58032	5.06539	8.69e-05	0.00193397
tAKR	1.12672	37.6599	5.06283	0.00200928	0.00872349
XLOC_007291	0.603684	20.1758	5.06269	0.00112691	0.00624052
XLOC_l2_001816	0.385457	12.8743	5.06178	0.000747678	0.00494802
XLOC_l2_008755	0.262632	8.76162	5.06009	0.000485272	0.00391131
XLOC_002043	0.336567	11.2269	5.05992	0.000747678	0.00494802
XLOC_005590	0.137388	4.58204	5.05967	3.65e-05	0.00157127
XLOC_l2_009467	0.347881	11.5903	5.05818	4.93e-05	0.0016654
XLOC_013570	0.290998	9.69481	5.05813	6.57e-05	0.00175355
TRHR	0.268354	8.93566	5.05737	0.000242536	0.00286432
XLOC_012241	3.39547	112.894	5.05522	0.000920519	0.00556824
XLOC_005770	0.180925	6.00834	5.0535	0.000147479	0.00233766
SPRN	0.16889	5.60328	5.05212	4.49e-06	0.00141763
XLOC_l2_010687	0.237326	7.86732	5.05093	0.000485272	0.00391131
XLOC_l2_009331	0.278358	9.2206	5.04985	0.00241368	0.00976436
ASIP	0.357134	11.8289	5.04971	4.49e-06	0.00141763
XLOC_000872	0.240574	7.95952	5.04813	0.000242536	0.00286432
SEPT3	0.42156	13.913	5.04455	0.00112691	0.00624052
CCL19	0.98687	32.5593	5.04407	0.000747678	0.00494802
XLOC_010662	0.345139	11.37	5.04191	0.00241368	0.00976436
LOC100507534	0.483685	15.901	5.03891	6.57e-05	0.00175355
MYBPC3	0.244037	8.02145	5.03869	0.00011353	0.00209946
LEFTY2	0.351166	11.5377	5.03806	0.00112691	0.00624052
DNAH2	0.152636	5.00974	5.03657	9.69e-06	0.00141763
XLOC_007573	0.260212	8.53781	5.03611	0.000387718	0.00350949
XLOC_009562	0.192153	6.30465	5.03609	0.000604293	0.00441187
XLOC_011147	0.552405	18.1109	5.03499	0.00200928	0.00872349
XLOC_012819	0.342365	11.1942	5.03107	0.00137324	0.00698991
LOC646498	0.315004	10.2975	5.03078	0.000747678	0.00494802
XLOC_l2_003856	0.294852	9.63245	5.02984	0.000147479	0.00233766
LOC283177	0.220766	7.20671	5.02875	0.000920519	0.00556824
GZMH	0.155736	5.08334	5.0286	0.000147479	0.00233766
RALGDS	0.350822	11.4434	5.02764	0.00137324	0.00698991
GUF1	0.225279	7.33548	5.0251	0.000242536	0.00286432
RUFY4	0.52295	17.0213	5.02453	0.000747678	0.00494802
XLOC_009740	0.192452	6.26058	5.02373	8.69e-05	0.00193397
XLOC_011010	0.528618	17.1921	5.02338	0.00200928	0.00872349
DCT	0.284131	9.2378	5.02292	6.57e-05	0.00175355
CGB2	0.142034	4.61574	5.02226	0.000147479	0.00233766
XLOC_010829	0.467584	15.1599	5.01889	0.00112691	0.00624052
XLOC_009608	0.23242	7.53355	5.01852	3.65e-05	0.00157127
XLOC_010828	0.274882	8.90559	5.01783	0.000307539	0.00316712
LOC100287728	0.35915	11.6339	5.01761	3.65e-05	0.00157127
INTS4L1	0.319582	10.3515	5.01751	0.00112691	0.00624052
LOC729770	0.355184	11.5025	5.01724	0.000242536	0.00286432
LCN9	0.34235	11.0676	5.01472	0.000189715	0.00258435
XLOC_001367	0.292176	9.44009	5.01389	8.69e-05	0.00193397
XLOC_007450	0.264972	8.55399	5.01269	0.00112691	0.00624052
CTSL1P2	0.394082	12.7198	5.01243	0.000387718	0.00350949
TRIM71	0.441112	14.2332	5.01197	0.00112691	0.00624052
XLOC_012145	0.50789	16.3849	5.01171	0.000147479	0.00233766
KRTAP9-1	0.353766	11.3888	5.00868	2.69e-05	0.00147231
LOC100653275	0.305385	9.82214	5.00734	0.000307539	0.00316712
XLOC_003114	0.21737	6.97581	5.00414	8.69e-05	0.00193397
XLOC_l2_008979	0.373589	11.9692	5.00173	0.00241368	0.00976436
PCDHA5	0.619477	19.8148	4.99938	0.000920519	0.00556824
LOC100652790	0.194277	6.20706	4.99772	0.000242536	0.00286432
XLOC_l2_001362	0.244189	7.79751	4.99695	0.000747678	0.00494802
XLOC_008547	0.341179	10.894	4.99686	8.69e-05	0.00193397
XLOC_011287	0.326076	10.4061	4.99607	0.0016646	0.0078152
OR7D4	0.345475	11.0224	4.99571	0.000485272	0.00391131
ZNF213	0.534799	17.0618	4.99563	0.00241368	0.00976436
LOC440742	0.213519	6.80653	4.99448	0.000747678	0.00494802
XLOC_009820	0.220475	7.0276	4.99435	0.000189715	0.00258435
OR8H2	0.207113	6.60068	4.99413	0.000485272	0.00391131
C9orf163	0.459225	14.617	4.9923	0.000189715	0.00258435
XLOC_007953	0.238685	7.58955	4.99083	0.00200928	0.00872349
XLOC_009190	0.838445	26.6489	4.99021	0.00200928	0.00872349
XLOC_010054	0.138726	4.40828	4.98991	0.000920519	0.00556824
PLEKHH3	0.359781	11.4225	4.98862	0.000485272	0.00391131
XLOC_013614	0.199584	6.32138	4.98517	1.39e-05	0.00141763
XLOC_009005	0.369453	11.6951	4.98437	0.000307539	0.00316712
COX6A2	0.588174	18.6141	4.98401	0.00200928	0.00872349
OR52R1	0.344796	10.9077	4.98346	0.000387718	0.00350949
KRTAP10-9	0.367431	11.6233	4.9834	6.57e-05	0.00175355
OR2AG1	0.367934	11.6313	4.98242	0.000485272	0.00391131
XLOC_005740	0.177621	5.61194	4.98162	0.0016646	0.0078152
XLOC_014086	0.444673	14.0414	4.9808	0.00011353	0.00209946
ZNF639	0.610267	19.2651	4.98041	0.00137324	0.00698991
XLOC_000208	0.61382	19.3333	4.97713	0.0016646	0.0078152
RRP7B	0.211209	6.63964	4.97436	6.57e-05	0.00175355
UG0898H09	0.299998	9.42058	4.97279	0.00241368	0.00976436
XLOC_007080	0.526031	16.5148	4.97247	0.00011353	0.00209946
WNT1	0.464826	14.5915	4.9723	0.000242536	0.00286432
LOC100130152	0.354035	11.1042	4.97106	0.000189715	0.00258435
XLOC_008962	0.187361	5.87001	4.96947	6.57e-05	0.00175355
XLOC_005945	0.585006	18.306	4.96772	0.0016646	0.0078152
XLOC_011100	0.404076	12.6315	4.96625	0.00200928	0.00872349
LOC100507513	0.211437	6.60743	4.96579	0.000147479	0.00233766
NAG20	0.224559	7.01153	4.96456	6.57e-05	0.00175355
XLOC_006476	0.316071	9.86493	4.96399	0.000307539	0.00316712
XLOC_002554	0.199275	6.21932	4.96393	0.000485272	0.00391131
ALPI	0.454497	14.1668	4.9621	0.000387718	0.00350949
LOC348120	0.358271	11.1661	4.96193	0.000307539	0.00316712
CRYGC	0.380576	11.8521	4.96081	0.000189715	0.00258435
XLOC_013817	0.451038	14.0444	4.9606	0.00241368	0.00976436
[truncated: 2,279 more rows]
